# Supplementary material
Source: publisher figshare collection journal article supplement (https://sage.figshare.com/ndownloader/files/12990707)
Supplement: Supplementary file 1 [file 12990707]

## Sheet: Contents
This file contains all the data used in the calculations (some animals had too few torpor bouts and were not included)
Sheets are named by the ambient temperature and the animal number
In each sheet, first column is the astronomical time in days from the start of the experiment

## Sheet: 8C_AN1
0.9583	36.88
0.9722	36.2
0.9861	35.64
1	36.2
1.0139	36.01
1.0278	35.95
1.0417	36.82
1.0556	36.14
1.0695	36.07
1.0833	36.14
1.0972	35.95
1.1111	37.26
1.125	37.94
1.1389	37.51
1.1528	36.63
1.1667	36.07
1.1806	35.51
1.1945	35.2
1.2083	36.63
1.2222	36.32
1.2361	35.58
1.25	36.32
1.2639	35.51
1.2778	35.2
1.2917	35.14
1.3056	34.7
1.3195	35.33
1.3333	35.7
1.3472	34.95
1.3611	34.52
1.375	34.2
1.3889	35.58
1.4028	35.89
1.4167	35.2
1.4306	35.08
1.4445	35.01
1.4583	34.95
1.4722	34.89
1.4861	34.95
1.5	35.26
1.5139	35.01
1.5278	35.76
1.5417	35.2
1.5556	35.51
1.5695	35.08
1.5833	35.64
1.5972	35.33
1.6111	35.89
1.625	36.51
1.6389	37.01
1.6528	36.95
1.6667	36.45
1.6806	35.95
1.6945	35.51
1.7083	35.26
1.7222	36.76
1.7361	35.7
1.75	35.2
1.7639	35.95
1.7778	37.38
1.7917	37.69
1.8056	36.32
1.8195	36.39
1.8333	35.76
1.8472	36.51
1.8611	35.64
1.875	35.01
1.8889	34.83
1.9028	35.82
1.9167	35.7
1.9306	35.33
1.9445	35.26
1.9583	36.32
1.9722	37.07
1.9861	37.76
2	37.76
2.0139	36.39
2.0278	36.45
2.0417	36.57
2.0556	35.82
2.0695	35.58
2.0833	35.26
2.0972	35.39
2.1111	36.32
2.125	36.32
2.1389	37.38
2.1528	37.01
2.1667	36.45
2.1806	36.32
2.1945	35.14
2.2083	34.77
2.2222	35.26
2.2361	36.07
2.25	35.26
2.2639	34.52
2.2778	34.45
2.2917	35.14
2.3056	35.33
2.3195	34.77
2.3333	34.64
2.3472	34.95
2.3611	34.39
2.375	35.82
2.3889	35.76
2.4028	35.51
2.4167	35.82
2.4306	35.45
2.4445	35.26
2.4583	35.64
2.4722	35.2
2.4861	35.64
2.5	35.45
2.5139	35.2
2.5278	35.2
2.5417	34.95
2.5556	34.89
2.5695	35.39
2.5833	36.26
2.5972	35.89
2.6111	35.58
2.625	35.82
2.6389	35.39
2.6528	35.39
2.6667	36.39
2.6806	35.89
2.6945	36.32
2.7083	36.07
2.7222	35.64
2.7361	35.82
2.75	36.76
2.7639	37.13
2.7778	37.13
2.7917	36.7
2.8056	36.01
2.8195	35.33
2.8333	35.51
2.8472	36.07
2.8611	36.32
2.875	35.45
2.8889	35.01
2.9028	36.95
2.9167	36.95
2.9306	36.7
2.9445	37.07
2.9583	37.82
2.9722	37.13
2.9861	36.76
3	36.01
3.0139	35.58
3.0278	35.39
3.0417	36.26
3.0556	35.95
3.0695	35.82
3.0833	35.58
3.0972	36.01
3.1111	36.7
3.125	36.63
3.1389	37.51
3.1528	38
3.1667	37.63
3.1806	36.7
3.1945	37.01
3.2083	36.7
3.2222	36.76
3.2361	35.7
3.25	35.39
3.2639	35.26
3.2778	36.2
3.2917	36.26
3.3056	36.01
3.3195	35.33
3.3333	34.89
3.3472	35.2
3.3611	35.45
3.375	35.7
3.3889	35.01
3.4028	35.01
3.4167	34.39
3.4306	34.83
3.4445	34.83
3.4583	35.82
3.4722	35.7
3.4861	35.39
3.5	35.33
3.5139	35.01
3.5278	35.01
3.5417	35.7
3.5556	35.7
3.5695	35.51
3.5833	34.95
3.5972	35.58
3.6111	34.83
3.625	35.95
3.6389	35.58
3.6528	35.64
3.6667	35.51
3.6806	35.64
3.6945	35.89
3.7083	35.7
3.7222	35.45
3.7361	36.14
3.75	35.82
3.7639	35.51
3.7778	36.2
3.7917	37.88
3.8056	37.38
3.8195	36.45
3.8333	36.07
3.8472	36.26
3.8611	37.32
3.875	36.76
3.8889	36.07
3.9028	36.45
3.9167	36.14
3.9306	35.89
3.9445	36.51
3.9583	37.82
3.9722	36.7
3.9861	36.76
4	36.07
4.0139	35.7
4.0278	35.58
4.0417	35.7
4.0556	36.32
4.0695	36.01
4.0833	35.51
4.0972	35.64
4.1111	36.95
4.125	37.01
4.1389	36.76
4.1528	37.57
4.1667	37.51
4.1806	36.95
4.1945	37.69
4.2083	37.13
4.2222	36.7
4.2361	35.95
4.25	35.33
4.2639	36.57
4.2778	36.26
4.2917	35.82
4.3056	35.39
4.3195	34.77
4.3333	34.64
4.3472	35.08
4.3611	35.2
4.375	34.77
4.3889	35.2
4.4028	35.64
4.4167	35.26
4.4306	34.83
4.4445	34.64
4.4583	34.39
4.4722	35.64
4.4861	35.33
4.5	35.01
4.5139	34.89
4.5278	34.89
4.5417	34.89
4.5556	34.95
4.5695	34.64
4.5833	35.39
4.5972	35.14
4.6111	35.26
4.625	35.26
4.6389	35.26
4.6528	35.64
4.6667	35.45
4.6806	35.14
4.6945	34.89
4.7083	35.7
4.7222	35.33
4.7361	35.14
4.75	35.95
4.7639	36.7
4.7778	36.63
4.7917	37.88
4.8056	37.38
4.8195	36.95
4.8333	36.26
4.8472	36.07
4.8611	36.7
4.875	37.26
4.8889	37.2
4.9028	37.2
4.9167	36.88
4.9306	36.26
4.9445	35.45
4.9583	35.82
4.9722	35.33
4.9861	35.14
5	35.39
5.0139	36.76
5.0278	36.57
5.0417	36.14
5.0556	35.76
5.0695	36.2
5.0833	35.95
5.0972	36.01
5.1111	36.01
5.125	36.88
5.1389	37.07
5.1528	37.51
5.1667	37.51
5.1806	37.26
5.1945	37.07
5.2083	37.2
5.2222	37.2
5.2361	36.45
5.25	36.32
5.2639	35.39
5.2778	34.7
5.2917	34.77
5.3056	35.33
5.3195	36.14
5.3333	35.51
5.3472	34.95
5.3611	34.95
5.375	34.58
5.3889	34.52
5.4028	35.39
5.4167	35.08
5.4306	34.64
5.4445	34.77
5.4583	34.39
5.4722	34.02
5.4861	34.27
5.5	34.52
5.5139	35.45
5.5278	35.08
5.5417	35.26
5.5556	35.08
5.5695	35.39
5.5833	35.14
5.5972	36.01
5.6111	36.7
5.625	36.14
5.6389	35.64
5.6528	35.2
5.6667	35.82
5.6806	35.39
5.6945	35.01
5.7083	34.83
5.7222	35.08
5.7361	35.7
5.75	35.33
5.7639	36.32
5.7778	37.38
5.7917	37.2
5.8056	36.88
5.8195	36.07
5.8333	35.7
5.8472	35.45
5.8611	35.01
5.875	35.26
5.8889	36.2
5.9028	36.51
5.9167	36.95
5.9306	37.13
5.9445	36.51
5.9583	36.76
5.9722	36.95
5.9861	36.88
6	36.7
6.0139	36.07
6.0278	35.26
6.0417	34.83
6.0556	36.01
6.0695	35.33
6.0833	35.14
6.0972	35.08
6.1111	35.82
6.125	35.58
6.1389	35.45
6.1528	35.2
6.1667	36.26
6.1806	37.44
6.1945	37.38
6.2083	36.57
6.2222	35.95
6.2361	35.51
6.25	35.39
6.2639	35.2
6.2778	35.01
6.2917	35.58
6.3056	35.76
6.3195	35.89
6.3333	35.39
6.3472	35.26
6.3611	35.33
6.375	35.33
6.3889	35.58
6.4028	35.39
6.4167	35.51
6.4306	35.76
6.4445	35.33
6.4583	35.2
6.4722	34.83
6.4861	34.52
6.5	35.2
6.5139	35.45
6.5278	35.76
6.5417	35.08
6.5556	35.08
6.5695	34.83
6.5833	35.39
6.5972	35.82
6.6111	35.45
6.625	35.33
6.6389	35.14
6.6528	35.51
6.6667	35.26
6.6806	36.07
6.6945	35.45
6.7083	35.76
6.7222	35.76
6.7361	35.14
6.75	35.33
6.7639	35.7
6.7778	37.38
6.7917	36.7
6.8056	35.95
6.8195	35.26
6.8333	35.39
6.8472	36.2
6.8611	35.51
6.875	35.33
6.8889	36.32
6.9028	37.07
6.9167	37.63
6.9306	37.51
6.9445	36.39
6.9583	36.2
6.9722	35.7
6.9861	35.39
7	35.08
7.0139	35.82
7.0278	36.07
7.0417	37.32
7.0556	36.51
7.0695	36.63
7.0833	36.7
7.0972	35.7
7.1111	35.2
7.125	35.33
7.1389	34.83
7.1528	35.51
7.1667	35.95
7.1806	35.2
7.1945	34.64
7.2083	34.58
7.2222	34.14
7.2361	34.64
7.25	34.08
7.2639	35.58
7.2778	36.63
7.2917	35.89
7.3056	36.01
7.3195	35.26
7.3333	34.7
7.3472	34.58
7.3611	34.39
7.375	34.33
7.3889	34.2
7.4028	34.27
7.4167	35.33
7.4306	34.7
7.4445	34.77
7.4583	34.14
7.4722	34.2
7.4861	34.95
7.5	35.7
7.5139	34.77
7.5278	34.14
7.5417	33.95
7.5556	34.08
7.5695	34.58
7.5833	35.82
7.5972	35.39
7.6111	34.77
7.625	34.14
7.6389	34.45
7.6528	34.33
7.6667	34.89
7.6806	35.2
7.6945	34.83
7.7083	34.7
7.7222	34.45
7.7361	34.89
7.75	34.89
7.7639	36.76
7.7778	36.63
7.7917	35.89
7.8056	35.26
7.8195	35.01
7.8333	34.83
7.8472	35.64
7.8611	35.58
7.875	35.7
7.8889	35.64
7.9028	35.7
7.9167	37.13
7.9306	37.13
7.9445	36.32
7.9583	36.82
7.9722	35.89
7.9861	35.45
8	35.08
8.0139	36.45
8.0278	36.07
8.0417	37.44
8.0556	37.13
8.0695	37.51
8.0833	37.26
8.0972	36.45
8.1111	36.45
8.125	35.89
8.1389	35.45
8.1528	34.95
8.1667	35.45
8.1806	35.45
8.1945	35.33
8.2083	36.01
8.2222	35.89
8.2361	36.2
8.25	35.58
8.2639	34.89
8.2778	34.58
8.2917	34.39
8.3056	35.45
8.3195	35.95
8.3333	35.58
8.3472	34.83
8.3611	34.39
8.375	35.58
8.3889	35.14
8.4028	34.7
8.4167	35.2
8.4306	34.45
8.4445	34.58
8.4583	34.08
8.4722	34.39
8.4861	35.95
8.5	35.39
8.5139	35.01
8.5278	34.77
8.5417	35.14
8.5556	34.89
8.5695	35.45
8.5833	35.2
8.5972	35.89
8.6111	35.51
8.625	34.95
8.6389	35.64
8.6528	35.76
8.6667	35.64
8.6806	35.39
8.6945	35.08
8.7083	35.26
8.7222	35.82
8.7361	35.33
8.75	35.2
8.7639	35.14
8.7778	36.7
8.7917	37.63
8.8056	36.76
8.8195	36.2
8.8333	35.51
8.8472	36.2
8.8611	35.64
8.875	35.39
8.8889	35.26
8.9028	36.2
8.9167	36.07
8.9306	35.95
8.9445	36.63
8.9583	37.38
8.9722	37.57
8.9861	36.76
9	37.32
9.0139	36.76
9.0278	36.82
9.0417	36.51
9.0556	36.14
9.0695	35.89
9.0833	35.45
9.0972	35.39
9.1111	35.39
9.125	36.26
9.1389	36.2
9.1528	35.89
9.1667	36.07
9.1806	37.13
9.1945	37.57
9.2083	37.07
9.2222	37.26
9.2361	37.07
9.25	36.39
9.2639	35.45
9.2778	36.39
9.2917	36.32
9.3056	35.76
9.3195	34.95
9.3333	34.58
9.3472	35.08
9.3611	34.58
9.375	34.58
9.3889	35.01
9.4028	35.26
9.4167	34.7
9.4306	34.83
9.4445	34.83
9.4583	35.76
9.4722	35.08
9.4861	34.89
9.5	34.95
9.5139	34.83
9.5278	34.14
9.5417	34.08
9.5556	34.58
9.5695	35.33
9.5833	34.95
9.5972	34.89
9.6111	34.64
9.625	34.33
9.6389	35.26
9.6528	35.76
9.6667	35.39
9.6806	35.64
9.6945	35.26
9.7083	34.95
9.7222	34.89
9.7361	36.26
9.75	36.45
9.7639	36.26
9.7778	35.76
9.7917	35.51
9.8056	35.58
9.8195	35.7
9.8333	35.14
9.8472	35.76
9.8611	36.51
9.875	37.57
9.8889	38.07
9.9028	37.26
9.9167	36.88
9.9306	35.82
9.9445	35.76
9.9583	35.33
9.9722	34.95
9.9861	35.33
10	35.76
10.0139	35.51
10.0278	35.82
10.0417	36.26
10.0556	36.63
10.0695	37.44
10.0833	38
10.0972	37.01
10.1111	36.63
10.125	36.88
10.1389	36.7
10.1528	36.45
10.1667	35.7
10.1806	34.95
10.1945	35.33
10.2083	36.76
10.2222	36.95
10.2361	36.51
10.25	35.58
10.2639	35.01
10.2778	35.08
10.2917	35.14
10.3056	35.89
10.3195	35.95
10.3333	35.33
10.3472	34.27
10.3611	34.27
10.375	34.02
10.3889	33.46
10.4028	33.46
10.4167	34.89
10.4306	35.14
10.4445	35.01
10.4583	35.01
10.4722	34.83
10.4861	34.64
10.5	34.7
10.5139	34.7
10.5278	35.01
10.5417	35.01
10.5556	35.7
10.5695	35.33
10.5833	34.83
10.5972	34.7
10.6111	34.7
10.625	35.33
10.6389	34.83
10.6528	35.01
10.6667	34.95
10.6806	35.58
10.6945	35.51
10.7083	35.14
10.7222	35.39
10.7361	35.89
10.75	35.7
10.7639	36.32
10.7778	36.2
10.7917	35.58
10.8056	35.33
10.8195	35.89
10.8333	35.82
10.8472	35.51
10.8611	35.39
10.875	35.89
10.8889	36.07
10.9028	35.64
10.9167	35.33
10.9306	36.51
10.9445	36.14
10.9583	36.51
10.9722	36.82
10.9861	36.95
11	36.57
11.0139	37.51
11.0278	37.51
11.0417	37.82
11.0556	36.82
11.0695	36.57
11.0833	35.7
11.0972	35.58
11.1111	35.64
11.125	35.2
11.1389	35.2
11.1528	35.58
11.1667	35.45
11.1806	34.95
11.1945	34.89
11.2083	36.45
11.2222	37.38
11.2361	37.32
11.25	36.95
11.2639	36.51
11.2778	35.76
11.2917	35.33
11.3056	35.58
11.3195	36.01
11.3333	35.51
11.3472	35.45
11.3611	35.2
11.375	35.14
11.3889	35.58
11.4028	35.39
11.4167	35.89
11.4306	35.95
11.4445	37.44
11.4583	37.57
11.4722	37.32
11.4861	37.2
11.5	37.01
11.5139	36.63
11.5278	36.63
11.5417	35.58
11.5556	34.89
11.5695	34.14
11.5833	34.39
11.5972	34.02
11.6111	34.2
11.625	34.08
11.6389	34.27
11.6528	34.45
11.6667	35.89
11.6806	35.95
11.6945	35.45
11.7083	35.33
11.7222	35.45
11.7361	35.51
11.75	35.89
11.7639	35.64
11.7778	36.32
11.7917	36.95
11.8056	36.57
11.8195	36.95
11.8333	37.82
11.8472	37.26
11.8611	36.63
11.875	36.7
11.8889	36.2
11.9028	35.58
11.9167	35.26
11.9306	36.01
11.9445	35.58
11.9583	35.45
11.9722	35.2
11.9861	35.58
12	35.76
12.0139	35.64
12.0278	35.45
12.0417	35.51
12.0556	35.26
12.0695	35.64
12.0833	35.82
12.0972	36.63
12.1111	37.44
12.125	37.44
12.1389	37.07
12.1528	36.14
12.1667	35.76
12.1806	35.33
12.1945	35.39
12.2083	36.2
12.2222	35.58
12.2361	35.26
12.25	35.01
12.2639	34.77
12.2778	35.08
12.2917	35.45
12.3056	36.32
12.3195	36.51
12.3333	37.32
12.3472	36.88
12.3611	36.32
12.375	35.45
12.3889	35.2
12.4028	34.77
12.4167	35.2
12.4306	37.32
12.4445	37.07
12.4583	36.2
12.4722	35.26
12.4861	35.01
12.5	35.14
12.5139	35.01
12.5278	35.82
12.5417	36.26
12.5556	35.76
12.5695	36.01
12.5833	35.45
12.5972	35.26
12.6111	36.01
12.625	35.7
12.6389	35.2
12.6528	35.26
12.6667	35.2
12.6806	36.39
12.6945	36.63
12.7083	35.95
12.7222	35.7
12.7361	36.01
12.75	37.07
12.7639	37.01
12.7778	38.38
12.7917	37.26
12.8056	36.32
12.8195	35.58
12.8333	36.26
12.8472	37.07
12.8611	35.89
12.875	35.33
12.8889	35.33
12.9028	35.64
12.9167	35.89
12.9306	35.64
12.9445	35.39
12.9583	35.39
12.9722	36.2
12.9861	36.63
13	37.69
13.0139	36.95
13.0278	36.57
13.0417	35.95
13.0556	35.58
13.0695	35.76
13.0833	35.76
13.0972	36.2
13.1111	36.32
13.125	36.76
13.1389	37.2
13.1528	36.76
13.1667	35.76
13.1806	35.58
13.1945	36.51
13.2083	36.32
13.2222	36.45
13.2361	35.7
13.25	35.39
13.2639	35.26
13.2778	35.82
13.2917	36.63
13.3056	35.82
13.3195	35.39
13.3333	35.01
13.3472	34.89
13.3611	35.01
13.375	35.39
13.3889	34.7
13.4028	35.01
13.4167	36.2
13.4306	35.76
13.4445	35.26
13.4583	35.2
13.4722	35.82
13.4861	36.07
13.5	36.07
13.5139	35.64
13.5278	36.07
13.5417	35.89
13.5556	35.7
13.5695	35.45
13.5833	36.2
13.5972	35.89
13.6111	35.7
13.625	35.26
13.6389	36.2
13.6528	35.51
13.6667	35.45
13.6806	36.39
13.6945	37.07
13.7083	36.7
13.7222	36.7
13.7361	36.26
13.75	35.89
13.7639	35.51
13.7778	36.57
13.7917	37.44
13.8056	37.2
13.8195	37.26
13.8333	36.76
13.8472	36.63
13.8611	35.95
13.875	35.7
13.8889	35.45
13.9028	35.33
13.9167	36.39
13.9306	36.7
13.9445	37.2
13.9583	37.07
13.9722	36.88
13.9861	35.89
14	35.58
14.0139	35.76
14.0278	35.89
14.0417	35.58
14.0556	35.58
14.0695	36.51
14.0833	36.32
14.0972	37.32
14.1111	37.63
14.125	36.57
14.1389	36.63
14.1528	35.7
14.1667	35.7
14.1806	35.39
14.1945	35.08
14.2083	35.64
14.2222	35.76
14.2361	35.76
14.25	36.76
14.2639	36.63
14.2778	35.51
14.2917	35.14
14.3056	34.64
14.3195	34.2
14.3333	34.52
14.3472	34.08
14.3611	34.02
14.375	34.52
14.3889	34.45
14.4028	34.58
14.4167	35.2
14.4306	34.89
14.4445	34.83
14.4583	34.77
14.4722	35.01
14.4861	35.14
14.5	34.77
14.5139	36.26
14.5278	36.2
14.5417	35.33
14.5556	35.08
14.5695	34.64
14.5833	34.95
14.5972	35.08
14.6111	36.01
14.625	35.58
14.6389	35.39
14.6528	35.58
14.6667	35.45
14.6806	35.2
14.6945	35.64
14.7083	35.39
14.7222	36.01
14.7361	35.95
14.75	35.76
14.7639	35.89
14.7778	37.2
14.7917	37.51
14.8056	36.76
14.8195	36.14
14.8333	35.89
14.8472	35.58
14.8611	36.51
14.875	36.14
14.8889	36.01
14.9028	36.39
14.9167	37.13
14.9306	37.26
14.9445	37.2
14.9583	37.38
14.9722	37.13
14.9861	36.26
15	35.58
15.0139	36.32
15.0278	36.95
15.0417	36.39
15.0556	35.95
15.0695	35.64
15.0833	35.39
15.0972	35.76
15.1111	35.33
15.125	35.51
15.1389	36.01
15.1528	36.32
15.1667	36.82
15.1806	37.32
15.1945	36.39
15.2083	36.01
15.2222	35.26
15.2361	34.89
15.25	35.51
15.2639	34.64
15.2778	35.2
15.2917	35.82
15.3056	34.89
15.3195	34.33
15.3333	34.45
15.3472	35.95
15.3611	35.58
15.375	34.95
15.3889	34.39
15.4028	33.95
15.4167	34.77
15.4306	34.39
15.4445	34.7
15.4583	35.45
15.4722	35.14
15.4861	35.14
15.5	34.7
15.5139	34.45
15.5278	34.45
15.5417	34.7
15.5556	35.08
15.5695	35.14
15.5833	34.95
15.5972	34.7
15.6111	34.64
15.625	35.14
15.6389	35.01
15.6528	36.07
15.6667	36.39
15.6806	35.76
15.6945	35.14
15.7083	35.39
15.7222	35.7
15.7361	35.89
15.75	35.51
15.7639	35.14
15.7778	35.01
15.7917	36.45
15.8056	37.01
15.8195	36.95
15.8333	36.32
15.8472	36.07
15.8611	35.26
15.875	35.01
15.8889	36.01
15.9028	35.51
15.9167	35.7
15.9306	36.51
15.9445	36.95
15.9583	36.82
15.9722	36.01
15.9861	35.39
16	35.08
16.0139	34.95
16.0278	35.82
16.0417	36.07
16.0556	36.51
16.0695	37.2
16.0833	36.2
16.0972	35.45
16.1111	34.89
16.125	34.89
16.1389	35.45
16.1528	34.95
16.1667	34.77
16.1806	34.58
16.1945	35.58
16.2083	36.88
16.2222	36.88
16.2361	36.82
16.25	36.26
16.2639	35.51
16.2778	35.14
16.2917	34.89
16.3056	34.77
16.3195	34.95
16.3333	34.58
16.3472	34.83
16.3611	35.01
16.375	34.7
16.3889	35.45
16.4028	35.01
16.4167	35.08
16.4306	34.2
16.4445	34.52
16.4583	34.45
16.4722	35.76
16.4861	34.89
16.5	34.64
16.5139	34.45
16.5278	34.64
16.5417	34.2
16.5556	35.33
16.5695	35.2
16.5833	35.01
16.5972	34.52
16.6111	34.7
16.625	34.95
16.6389	34.64
16.6528	35.2
16.6667	34.89
16.6806	35.01
16.6945	35.95
16.7083	36.76
16.7222	36.63
16.7361	35.7
16.75	35.14
16.7639	35.01
16.7778	36.45
16.7917	36.51
16.8056	36.32
16.8195	35.33
16.8333	35.01
16.8472	34.83
16.8611	35.45
16.875	35.39
16.8889	36.01
16.9028	36.45
16.9167	36.76
16.9306	36.7
16.9445	36.32
16.9583	36.14
16.9722	35.2
16.9861	34.89
17	34.77
17.0139	36.39
17.0278	36.01
17.0417	35.95
17.0556	35.45
17.0695	35.26
17.0833	35.76
17.0972	36.39
17.1111	37.44
17.125	37.07
17.1389	36.63
17.1528	36.26
17.1667	35.33
17.1806	35.39
17.1945	34.7
17.2083	34.77
17.2222	35.89
17.2361	36.26
17.25	35.14
17.2639	33.89
17.2778	33.33
17.2917	33.08
17.3056	32.83
17.3195	33.33
17.3333	34.39
17.3472	35.58
17.3611	35.08
17.375	34.39
17.3889	34.52
17.4028	34.14
17.4167	34.14
17.4306	33.83
17.4445	35.82
17.4583	35.45
17.4722	34.77
17.4861	34.52
17.5	35.01
17.5139	35.39
17.5278	35.2
17.5417	35.08
17.5556	34.52
17.5695	34.33
17.5833	34.83
17.5972	34.52
17.6111	34.14
17.625	34.7
17.6389	35.89
17.6528	35.58
17.6667	34.89
17.6806	34.7
17.6945	34.83
17.7083	35.2
17.7222	35.01
17.7361	34.77
17.75	35.89
17.7639	36.14
17.7778	37.01
17.7917	36.7
17.8056	36.2
17.8195	35.51
17.8333	35.58
17.8472	36.07
17.8611	35.51
17.875	35.89
17.8889	34.52
17.9028	33.08
17.9167	31.77
17.9306	30.4
17.9445	29.21
17.9583	27.9
17.9722	26.47
17.9861	25.34
18	24.09
18.0139	22.71
18.0278	21.53
18.0417	20.4
18.0556	19.27
18.0695	18.33
18.0833	17.58
18.0972	16.77
18.1111	16.14
18.125	15.45
18.1389	14.89
18.1528	14.39
18.1667	13.88
18.1806	13.45
18.1945	13.07
18.2083	12.63
18.2222	12.25
18.2361	11.94
18.25	11.63
18.2639	11.38
18.2778	11.12
18.2917	10.87
18.3056	10.69
18.3195	10.5
18.3333	10.31
18.3472	10.18
18.3611	9.93
18.375	9.68
18.3889	9.43
18.4028	9.12
18.4167	8.87
18.4306	8.68
18.4445	8.49
18.4583	8.3
18.4722	8.11
18.4861	7.92
18.5	7.86
18.5139	7.67
18.5278	7.48
18.5417	7.36
18.5556	7.17
18.5695	7.04
18.5833	7.04
18.5972	7.04
18.6111	6.98
18.625	6.92
18.6389	6.92
18.6528	6.98
18.6667	7.04
18.6806	7.04
18.6945	7.11
18.7083	7.17
18.7222	7.11
18.7361	7.11
18.75	7.17
18.7639	7.23
18.7778	7.23
18.7917	7.29
18.8056	7.42
18.8195	7.48
18.8333	7.55
18.8472	7.67
18.8611	7.67
18.875	7.73
18.8889	7.8
18.9028	7.86
18.9167	7.92
18.9306	7.99
18.9445	8.05
18.9583	8.11
18.9722	8.17
18.9861	8.17
19	8.24
19.0139	8.24
19.0278	8.24
19.0417	8.24
19.0556	8.24
19.0695	8.3
19.0833	8.3
19.0972	8.3
19.1111	8.36
19.125	8.36
19.1389	8.36
19.1528	8.43
19.1667	8.43
19.1806	8.49
19.1945	8.49
19.2083	8.49
19.2222	8.43
19.2361	8.43
19.25	8.49
19.2639	8.49
19.2778	8.49
19.2917	8.55
19.3056	8.55
19.3195	8.55
19.3333	8.49
19.3472	8.49
19.3611	8.49
19.375	8.36
19.3889	8.24
19.4028	8.17
19.4167	8.05
19.4306	7.86
19.4445	7.67
19.4583	7.55
19.4722	7.42
19.4861	7.29
19.5	7.11
19.5139	6.98
19.5278	6.86
19.5417	6.79
19.5556	6.6
19.5695	6.42
19.5833	6.23
19.5972	6.1
19.6111	6.04
19.625	5.98
19.6389	5.91
19.6528	5.98
19.6667	6.16
19.6806	6.42
19.6945	6.86
19.7083	7.29
19.7222	7.8
19.7361	8.36
19.75	8.93
19.7639	9.49
19.7778	9.93
19.7917	10.37
19.8056	11.06
19.8195	11.88
19.8333	12.76
19.8472	14.07
19.8611	18.9
19.875	29.34
19.8889	33.14
19.9028	34.95
19.9167	34.95
19.9306	34.83
19.9445	35.64
19.9583	35.08
19.9722	35.82
19.9861	35.58
20	35.51
20.0139	35.33
20.0278	35.45
20.0417	35.33
20.0556	35.33
20.0695	34.58
20.0833	35.82
20.0972	35.45
20.1111	35.2
20.125	34.83
20.1389	35.26
20.1528	34.95
20.1667	35.2
20.1806	36.14
20.1945	35.58
20.2083	35.08
20.2222	35.08
20.2361	35.45
20.25	34.95
20.2639	35.01
20.2778	36.07
20.2917	36.32
20.3056	36.7
20.3195	37.13
20.3333	36.51
20.3472	36.26
20.3611	35.58
20.375	35.26
20.3889	35.14
20.4028	35.45
20.4167	35.14
20.4306	35.39
20.4445	35.82
20.4583	35.89
20.4722	36.32
20.4861	36.7
20.5	35.76
20.5139	35.14
20.5278	35.14
20.5417	34.7
20.5556	34.39
20.5695	34.45
20.5833	35.08
20.5972	35.26
20.6111	34.89
20.625	34.83
20.6389	35.33
20.6528	36.07
20.6667	35.95
20.6806	35.82
20.6945	35.14
20.7083	34.83
20.7222	34.45
20.7361	34.89
20.75	34.58
20.7639	34.77
20.7778	35.26
20.7917	35.14
20.8056	34.64
20.8195	34.27
20.8333	34.27
20.8472	35.08
20.8611	35.95
20.875	36.07
20.8889	35.58
20.9028	34.89
20.9167	34.39
20.9306	35.33
20.9445	34.89
20.9583	34.64
20.9722	34.39
20.9861	34.64
21	35.01
21.0139	35.76
21.0278	36.07
21.0417	36.63
21.0556	36.76
21.0695	36.39
21.0833	35.82
21.0972	35.26
21.1111	35.14
21.125	35.2
21.1389	35.14
21.1528	35.45
21.1667	35.08
21.1806	35.45
21.1945	35.7
21.2083	36.45
21.2222	36.88
21.2361	36.51
21.25	35.7
21.2639	35.08
21.2778	34.83
21.2917	34.89
21.3056	34.58
21.3195	34.77
21.3333	35.14
21.3472	33.83
21.3611	32.77
21.375	31.58
21.3889	30.34
21.4028	29.34
21.4167	27.78
21.4306	26.47
21.4445	25.34
21.4583	23.97
21.4722	22.71
21.4861	21.59
21.5	20.46
21.5139	19.46
21.5278	18.52
21.5417	17.58
21.5556	16.83
21.5695	16.08
21.5833	15.39
21.5972	14.82
21.6111	14.26
21.625	13.63
21.6389	13.19
21.6528	12.69
21.6667	12.32
21.6806	11.94
21.6945	11.56
21.7083	11.19
21.7222	10.87
21.7361	10.69
21.75	10.56
21.7639	10.37
21.7778	10.25
21.7917	10.06
21.8056	9.93
21.8195	9.87
21.8333	9.74
21.8472	9.68
21.8611	9.62
21.875	9.56
21.8889	9.49
21.9028	9.49
21.9167	9.43
21.9306	9.43
21.9445	9.43
21.9583	9.37
21.9722	9.37
21.9861	9.37
22	9.37
22.0139	9.3
22.0278	9.3
22.0417	9.24
22.0556	9.24
22.0695	9.3
22.0833	9.3
22.0972	9.24
22.1111	9.24
22.125	9.3
22.1389	9.24
22.1528	9.24
22.1667	9.24
22.1806	9.3
22.1945	9.24
22.2083	9.18
22.2222	9.24
22.2361	9.24
22.25	9.18
22.2639	9.18
22.2778	9.24
22.2917	9.18
22.3056	9.18
22.3195	9.18
22.3333	9.18
22.3472	9.12
22.3611	9.12
22.375	9.05
22.3889	9.05
22.4028	8.99
22.4167	8.93
22.4306	8.93
22.4445	8.87
22.4583	8.8
22.4722	8.74
22.4861	8.68
22.5	8.61
22.5139	8.61
22.5278	8.55
22.5417	8.49
22.5556	8.49
22.5695	8.43
22.5833	8.36
22.5972	8.3
22.6111	8.24
22.625	8.17
22.6389	8.05
22.6528	7.92
22.6667	7.8
22.6806	7.67
22.6945	7.55
22.7083	7.36
22.7222	7.11
22.7361	6.86
22.75	6.6
22.7639	6.48
22.7778	6.29
22.7917	6.04
22.8056	5.85
22.8195	5.72
22.8333	5.6
22.8472	5.54
22.8611	5.47
22.875	5.41
22.8889	5.54
22.9028	5.79
22.9167	5.98
22.9306	6.29
22.9445	6.73
22.9583	7.23
22.9722	7.92
22.9861	8.74
23	9.37
23.0139	10.12
23.0278	11
23.0417	11.88
23.0556	12.94
23.0695	13.95
23.0833	15.64
23.0972	20.02
23.1111	29.09
23.125	33.95
23.1389	34.7
23.1528	35.2
23.1667	35.2
23.1806	35.26
23.1945	35.2
23.2083	34.89
23.2222	36.07
23.2361	35.58
23.25	35.2
23.2639	35.01
23.2778	35.01
23.2917	35.01
23.3056	34.95
23.3195	35.39
23.3333	35.7
23.3472	35.45
23.3611	35.01
23.375	35.2
23.3889	35.95
23.4028	36.2
23.4167	36.32
23.4306	36.2
23.4445	36.7
23.4583	36.26
23.4722	35.45
23.4861	35.26
23.5	36.14
23.5139	35.82
23.5278	37.13
23.5417	36.39
23.5556	37.07
23.5695	36.45
23.5833	35.7
23.5972	35.76
23.6111	35.7
23.625	35.89
23.6389	36.2
23.6528	36.39
23.6667	35.82
23.6806	35.26
23.6945	34.83
23.7083	34.58
23.7222	34.7
23.7361	34.45
23.75	34.33
23.7639	34.64
23.7778	34.33
23.7917	34.77
23.8056	35.82
23.8195	36.45
23.8333	36.45
23.8472	35.89
23.8611	34.89
23.875	34.7
23.8889	34.39
23.9028	34.27
23.9167	34.27
23.9306	34.83
23.9445	34.08
23.9583	34.27
23.9722	34.95
23.9861	35.89
24	36.26
24.0139	35.2
24.0278	34.52
24.0417	34.89
24.0556	34.95
24.0695	34.7
24.0833	34.58
24.0972	34.45
24.1111	34.52
24.125	34.39
24.1389	34.64
24.1528	35.82
24.1667	35.01
24.1806	34.2
24.1945	33.83
24.2083	33.64
24.2222	33.83
24.2361	33.33
24.25	34.64
24.2639	34.58
24.2778	34.27
24.2917	34.39
24.3056	35.2
24.3195	35.51
24.3333	35.95
24.3472	35.14
24.3611	34.33
24.375	34.52
24.3889	34.08
24.4028	34.14
24.4167	34.2
24.4306	35.33
24.4445	35.7
24.4583	35.64
24.4722	34.14
24.4861	32.52
24.5	30.65
24.5139	29.84
24.5278	28.4
24.5417	26.65
24.5556	25.03
24.5695	23.53
24.5833	21.9
24.5972	20.46
24.6111	19.21
24.625	18.08
24.6389	17.08
24.6528	16.2
24.6667	15.39
24.6806	14.7
24.6945	14.01
24.7083	13.38
24.7222	12.88
24.7361	12.44
24.75	11.94
24.7639	11.63
24.7778	11.19
24.7917	10.87
24.8056	10.56
24.8195	10.31
24.8333	10.12
24.8472	9.87
24.8611	9.62
24.875	9.49
24.8889	9.37
24.9028	9.18
24.9167	9.12
24.9306	9.05
24.9445	8.93
24.9583	8.93
24.9722	8.87
24.9861	8.8
25	8.87
25.0139	8.8
25.0278	8.74
25.0417	8.74
25.0556	8.74
25.0695	8.68
25.0833	8.68
25.0972	8.68
25.1111	8.68
25.125	8.68
25.1389	8.68
25.1528	8.68
25.1667	8.74
25.1806	8.74
25.1945	8.68
25.2083	8.68
25.2222	8.68
25.2361	8.74
25.25	8.74
25.2639	8.74
25.2778	8.74
25.2917	8.74
25.3056	8.74
25.3195	8.74
25.3333	8.74
25.3472	8.68
25.3611	8.61
25.375	8.55
25.3889	8.49
25.4028	8.43
25.4167	8.36
25.4306	8.24
25.4445	8.17
25.4583	8.11
25.4722	7.99
25.4861	7.92
25.5	7.8
25.5139	7.67
25.5278	7.55
25.5417	7.48
25.5556	7.42
25.5695	7.29
25.5833	7.17
25.5972	7.11
25.6111	7.04
25.625	6.92
25.6389	6.92
25.6528	6.92
25.6667	6.86
25.6806	6.79
25.6945	6.73
25.7083	6.67
25.7222	6.73
25.7361	6.79
25.75	6.79
25.7639	6.86
25.7778	6.98
25.7917	6.98
25.8056	7.11
25.8195	7.17
25.8333	7.23
25.8472	7.29
25.8611	7.29
25.875	7.36
25.8889	7.48
25.9028	7.55
25.9167	7.61
25.9306	7.67
25.9445	7.8
25.9583	7.86
25.9722	7.92
25.9861	7.99
26	8.11
26.0139	8.11
26.0278	8.17
26.0417	8.24
26.0556	8.3
26.0695	8.36
26.0833	8.43
26.0972	8.49
26.1111	8.49
26.125	8.55
26.1389	8.61
26.1528	8.61
26.1667	8.68
26.1806	8.68
26.1945	8.68
26.2083	8.68
26.2222	8.74
26.2361	8.74
26.25	8.74
26.2639	8.8
26.2778	8.8
26.2917	8.8
26.3056	8.87
26.3195	8.8
26.3333	8.8
26.3472	8.68
26.3611	8.61
26.375	8.55
26.3889	8.49
26.4028	8.36
26.4167	8.24
26.4306	8.17
26.4445	8.05
26.4583	7.86
26.4722	7.73
26.4861	7.67
26.5	7.61
26.5139	7.48
26.5278	7.36
26.5417	7.36
26.5556	7.29
26.5695	7.29
26.5833	7.23
26.5972	7.17
26.6111	7.11
26.625	7.11
26.6389	7.11
26.6528	7.11
26.6667	7.11
26.6806	7.11
26.6945	7.04
26.7083	7.11
26.7222	7.11
26.7361	7.11
26.75	7.23
26.7639	7.29
26.7778	7.36
26.7917	7.48
26.8056	7.55
26.8195	7.61
26.8333	7.67
26.8472	7.67
26.8611	7.73
26.875	7.8
26.8889	7.86
26.9028	7.86
26.9167	7.92
26.9306	8.05
26.9445	8.05
26.9583	8.11
26.9722	8.17
26.9861	8.24
27	8.3
27.0139	8.3
27.0278	8.3
27.0417	8.36
27.0556	8.43
27.0695	8.43
27.0833	8.49
27.0972	8.55
27.1111	8.55
27.125	8.55
27.1389	8.61
27.1528	8.61
27.1667	8.68
27.1806	8.68
27.1945	8.68
27.2083	8.68
27.2222	8.74
27.2361	8.68
27.25	8.74
27.2639	8.74
27.2778	8.74
27.2917	8.74
27.3056	8.87
27.3195	9.18
27.3333	10
27.3472	11.06
27.3611	12.19
27.375	13.57
27.3889	15.51
27.4028	19.59
27.4167	30.21
27.4306	34.27
27.4445	34.7
27.4583	35.26
27.4722	35.26
27.4861	35.76
27.5	35.82
27.5139	35.64
27.5278	35.64
27.5417	35.82
27.5556	35.45
27.5695	36.2
27.5833	36.45
27.5972	36.51
27.6111	36.57
27.625	35.76
27.6389	35.14
27.6528	35.26
27.6667	35.82
27.6806	35.39
27.6945	35.14
27.7083	35.2
27.7222	35.64
27.7361	36.07
27.75	36.76
27.7639	37.07
27.7778	36.51
27.7917	36.32
27.8056	35.58
27.8195	36.32
27.8333	35.82
27.8472	36.01
27.8611	36.26
27.875	35.58
27.8889	34.77
27.9028	34.27
27.9167	34.02
27.9306	33.52
27.9445	33.95
27.9583	34.83
27.9722	35.76
27.9861	35.01
28	34.64
28.0139	33.89
28.0278	34.08
28.0417	33.89
28.0556	34.7
28.0695	34.08
28.0833	33.89
28.0972	34.14
28.1111	34.7
28.125	33.33
28.1389	31.96
28.1528	30.59
28.1667	29.09
28.1806	27.84
28.1945	26.47
28.2083	25.22
28.2222	24.03
28.2361	22.78
28.25	21.59
28.2639	20.52
28.2778	19.59
28.2917	18.65
28.3056	17.83
28.3195	17.08
28.3333	16.33
28.3472	15.64
28.3611	15.01
28.375	14.39
28.3889	13.76
28.4028	13.26
28.4167	12.69
28.4306	12.13
28.4445	11.63
28.4583	11.12
28.4722	10.69
28.4861	10.18
28.5	9.74
28.5139	9.37
28.5278	8.93
28.5417	8.55
28.5556	8.24
28.5695	7.99
28.5833	7.67
28.5972	7.36
28.6111	7.17
28.625	6.98
28.6389	6.86
28.6528	6.67
28.6667	6.54
28.6806	6.35
28.6945	6.23
28.7083	6.16
28.7222	6.16
[truncated: 2,096 more rows]

## Sheet: 8C_AN2
0.9583	37.57
0.9722	37.7
0.9861	37.01
1	36.58
1.0139	36.7
1.0278	37.51
1.0417	37.2
1.0556	37.64
1.0695	37.88
1.0833	37.57
1.0972	36.58
1.1111	35.95
1.125	35.89
1.1389	37.26
1.1528	37.32
1.1667	36.89
1.1806	36.51
1.1945	35.95
1.2083	36.33
1.2222	35.95
1.2361	35.95
1.25	36.45
1.2639	36.45
1.2778	36.95
1.2917	36.64
1.3056	36.39
1.3195	36.14
1.3333	35.77
1.3472	35.7
1.3611	35.45
1.375	35.14
1.3889	36.02
1.4028	35.83
1.4167	36.33
1.4306	36.14
1.4445	36.14
1.4583	35.83
1.4722	35.83
1.4861	35.58
1.5	36.26
1.5139	36.08
1.5278	36.08
1.5417	36.14
1.5556	36.2
1.5695	36.2
1.5833	35.52
1.5972	35.83
1.6111	36.14
1.625	36.51
1.6389	36.02
1.6528	35.77
1.6667	35.52
1.6806	35.83
1.6945	35.39
1.7083	35.39
1.7222	35.83
1.7361	36.51
1.75	35.83
1.7639	36.02
1.7778	36.08
1.7917	36.14
1.8056	36.76
1.8195	37.57
1.8333	37.45
1.8472	36.83
1.8611	36.33
1.875	35.95
1.8889	35.77
1.9028	36.02
1.9167	36.33
1.9306	36.39
1.9445	37.64
1.9583	37.88
1.9722	37.64
1.9861	37.7
2	37.01
2.0139	36.2
2.0278	35.7
2.0417	36.58
2.0556	38.13
2.0695	37.82
2.0833	37.2
2.0972	36.64
2.1111	37.2
2.125	36.83
2.1389	36.58
2.1528	36.02
2.1667	35.77
2.1806	35.7
2.1945	35.77
2.2083	36.7
2.2222	36.14
2.2361	36.02
2.25	36.95
2.2639	37.57
2.2778	36.83
2.2917	36.89
2.3056	37.82
2.3195	36.58
2.3333	36.51
2.3472	35.83
2.3611	35.2
2.375	36.33
2.3889	35.83
2.4028	35.33
2.4167	35.14
2.4306	35.52
2.4445	35.39
2.4583	35.08
2.4722	35.08
2.4861	35.2
2.5	35.2
2.5139	35.2
2.5278	35.39
2.5417	35.7
2.5556	35.58
2.5695	35.52
2.5833	35.39
2.5972	35.45
2.6111	35.2
2.625	35.89
2.6389	35.95
2.6528	36.02
2.6667	36.08
2.6806	35.95
2.6945	36.08
2.7083	35.39
2.7222	36.51
2.7361	36.51
2.75	36.33
2.7639	36.33
2.7778	36.76
2.7917	36.26
2.8056	36.02
2.8195	36.64
2.8333	36.39
2.8472	36.51
2.8611	36.08
2.875	36.76
2.8889	37.45
2.9028	37.26
2.9167	37.57
2.9306	37.7
2.9445	37.51
2.9583	37.7
2.9722	36.95
2.9861	36.58
3	36.45
3.0139	36.26
3.0278	36.2
3.0417	36.83
3.0556	36.64
3.0695	36.45
3.0833	36.51
3.0972	37.64
3.1111	37.51
3.125	37.07
3.1389	36.33
3.1528	36.2
3.1667	37.51
3.1806	37.14
3.1945	36.58
3.2083	36.2
3.2222	36.14
3.2361	36.26
3.25	36.2
3.2639	37.07
3.2778	37.88
3.2917	37.2
3.3056	36.02
3.3195	36.02
3.3333	36.51
3.3472	35.52
3.3611	35.27
3.375	35.45
3.3889	35.39
3.4028	35.39
3.4167	35.33
3.4306	35.77
3.4445	36.08
3.4583	35.64
3.4722	35.45
3.4861	35.83
3.5	35.58
3.5139	35.7
3.5278	36.39
3.5417	36.26
3.5556	35.89
3.5695	35.77
3.5833	36.2
3.5972	35.95
3.6111	35.64
3.625	35.95
3.6389	35.95
3.6528	36.7
3.6667	36.26
3.6806	35.89
3.6945	35.95
3.7083	36.33
3.7222	36.08
3.7361	35.95
3.75	35.77
3.7639	36.02
3.7778	36.2
3.7917	36.33
3.8056	36.39
3.8195	36.33
3.8333	36.26
3.8472	37.2
3.8611	37.32
3.875	37.57
3.8889	37.76
3.9028	37.51
3.9167	37.39
3.9306	37.26
3.9445	38.13
3.9583	36.89
3.9722	36.7
3.9861	37.51
4	37.57
4.0139	37.45
4.0278	36.95
4.0417	36.76
4.0556	36.39
4.0695	36.08
4.0833	36.14
4.0972	36.2
4.1111	36.51
4.125	36.33
4.1389	36.2
4.1528	35.77
4.1667	36.76
4.1806	36.76
4.1945	36.39
4.2083	36.51
4.2222	37.76
4.2361	37.51
4.25	37.2
4.2639	36.39
4.2778	36.14
4.2917	37.01
4.3056	36.76
4.3195	36.58
4.3333	36.02
4.3472	35.45
4.3611	35.33
4.375	34.96
4.3889	34.96
4.4028	35.08
4.4167	35.14
4.4306	35.39
4.4445	35.7
4.4583	36.08
4.4722	35.7
4.4861	35.7
4.5	36.02
4.5139	36.02
4.5278	36.02
4.5417	35.89
4.5556	36.14
4.5695	36.08
4.5833	36.14
4.5972	36.14
4.6111	36.14
4.625	35.83
4.6389	35.77
4.6528	36.39
4.6667	36.26
4.6806	36.2
4.6945	35.83
4.7083	36.51
4.7222	36.58
4.7361	36.76
4.75	37.39
4.7639	36.83
4.7778	36.51
4.7917	36.51
4.8056	37.45
4.8195	37.57
4.8333	37.45
4.8472	37.01
4.8611	36.45
4.875	35.95
4.8889	36.26
4.9028	36.51
4.9167	36.26
4.9306	36.26
4.9445	36.14
4.9583	37.26
4.9722	37.82
4.9861	37.45
5	37.82
5.0139	38.07
5.0278	37.57
5.0417	36.95
5.0556	36.64
5.0695	36.26
5.0833	35.83
5.0972	36.02
5.1111	37.45
5.125	37.51
5.1389	37.51
5.1528	36.7
5.1667	35.95
5.1806	36.58
5.1945	35.58
5.2083	35.77
5.2222	36.02
5.2361	36.2
5.25	37.14
5.2639	37.45
5.2778	37.26
5.2917	36.58
5.3056	35.58
5.3195	35.2
5.3333	35.95
5.3472	36.45
5.3611	35.7
5.375	36.14
5.3889	35.89
5.4028	35.58
5.4167	35.64
5.4306	35.7
5.4445	35.58
5.4583	35.52
5.4722	36.39
5.4861	35.95
5.5	36.33
5.5139	35.83
5.5278	36.14
5.5417	35.58
5.5556	35.7
5.5695	36.2
5.5833	35.64
5.5972	35.33
5.6111	35.64
5.625	35.64
5.6389	35.77
5.6528	35.39
5.6667	36.02
5.6806	36.08
5.6945	36.02
5.7083	36.08
5.7222	36.08
5.7361	36.08
5.75	37.01
5.7639	36.95
5.7778	38.13
5.7917	37.14
5.8056	36.26
5.8195	36.45
5.8333	36.45
5.8472	36.58
5.8611	35.77
5.875	36.26
5.8889	36.76
5.9028	36.83
5.9167	36.64
5.9306	37.7
5.9445	37.39
5.9583	37.64
5.9722	37.82
5.9861	37.2
6	36.7
6.0139	36.26
6.0278	36.89
6.0417	36.76
6.0556	36.58
6.0695	36.14
6.0833	35.83
6.0972	36.02
6.1111	36.89
6.125	37.95
6.1389	37.57
6.1528	37.14
6.1667	37.2
6.1806	36.26
6.1945	36.02
6.2083	36.02
6.2222	36.45
6.2361	36.51
6.25	36.14
6.2639	35.58
6.2778	36.64
6.2917	36.95
6.3056	36.08
6.3195	35.27
6.3333	34.71
6.3472	35.2
6.3611	34.96
6.375	34.77
6.3889	35.7
6.4028	36.02
6.4167	35.95
6.4306	35.64
6.4445	35.58
6.4583	35.39
6.4722	35.39
6.4861	36.02
6.5	35.64
6.5139	35.83
6.5278	35.95
6.5417	35.95
6.5556	35.83
6.5695	35.39
6.5833	35.89
6.5972	35.89
6.6111	36.39
6.625	35.7
6.6389	35.39
6.6528	35.27
6.6667	35.52
6.6806	35.45
6.6945	35.64
6.7083	36.2
6.7222	36.14
6.7361	36.58
6.75	36.2
6.7639	35.64
6.7778	35.33
6.7917	35.14
6.8056	35.64
6.8195	36.33
6.8333	36.14
6.8472	36.33
6.8611	37.45
6.875	37.76
6.8889	37.82
6.9028	37.32
6.9167	37.39
6.9306	37.32
6.9445	36.83
6.9583	36.2
6.9722	36.08
6.9861	35.95
7	37.32
7.0139	37.45
7.0278	37.76
7.0417	37.32
7.0556	36.58
7.0695	36.2
7.0833	35.83
7.0972	36.39
7.1111	37.14
7.125	36.45
7.1389	36.14
7.1528	36.14
7.1667	36.2
7.1806	36.95
7.1945	37.57
7.2083	37.57
7.2222	36.89
7.2361	36.26
7.25	36.02
7.2639	36.2
7.2778	36.33
7.2917	36.95
7.3056	37.14
7.3195	36.51
7.3333	36.39
7.3472	35.39
7.3611	35.02
7.375	34.71
7.3889	35.02
7.4028	35.2
7.4167	35.14
7.4306	35.45
7.4445	35.39
7.4583	35.33
7.4722	35.02
7.4861	35.33
7.5	35.83
7.5139	35.52
7.5278	35.7
7.5417	35.89
7.5556	35.33
7.5695	35.33
7.5833	35.64
7.5972	35.83
7.6111	35.7
7.625	35.58
7.6389	35.64
7.6528	35.45
7.6667	35.27
7.6806	36.2
7.6945	36.58
7.7083	36.2
7.7222	36.39
7.7361	35.7
7.75	35.77
7.7639	36.26
7.7778	36.95
7.7917	36.7
7.8056	37.26
7.8195	36.64
7.8333	36.02
7.8472	35.89
7.8611	36.64
7.875	36.2
7.8889	36.02
7.9028	36.83
7.9167	37.14
7.9306	37.26
7.9445	37.39
7.9583	36.76
7.9722	36.26
7.9861	36.83
8	37.39
8.0139	37.51
8.0278	37.26
8.0417	36.33
8.0556	35.95
8.0695	35.52
8.0833	36.2
8.0972	37.45
8.1111	36.89
8.125	36.95
8.1389	36.02
8.1528	35.77
8.1667	35.64
8.1806	36.02
8.1945	36.76
8.2083	36.58
8.2222	37.07
8.2361	36.2
8.25	35.77
8.2639	35.52
8.2778	35.14
8.2917	35.52
8.3056	36.26
8.3195	36.2
8.3333	36.14
8.3472	35.52
8.3611	35.27
8.375	34.89
8.3889	34.83
8.4028	35.2
8.4167	36.26
8.4306	35.52
8.4445	35.83
8.4583	35.33
8.4722	35.27
8.4861	36.02
8.5	35.45
8.5139	35.2
8.5278	35.95
8.5417	35.95
8.5556	35.95
8.5695	36.33
8.5833	36.02
8.5972	35.89
8.6111	35.39
8.625	36.08
8.6389	35.83
8.6528	35.89
8.6667	36.08
8.6806	36.08
8.6945	35.45
8.7083	35.14
8.7222	35.77
8.7361	35.95
8.75	36.45
8.7639	35.89
8.7778	35.77
8.7917	35.7
8.8056	35.89
8.8195	36.51
8.8333	36.89
8.8472	37.64
8.8611	37.45
8.875	36.83
8.8889	36.76
8.9028	36.39
8.9167	35.95
8.9306	35.45
8.9445	36.33
8.9583	37.76
8.9722	37.26
8.9861	37.57
9	37.88
9.0139	37.76
9.0278	36.76
9.0417	36.02
9.0556	36.95
9.0695	37.2
9.0833	37.2
9.0972	36.76
9.1111	36.2
9.125	36.08
9.1389	35.95
9.1528	36.08
9.1667	36.26
9.1806	37.07
9.1945	37.88
9.2083	37.57
9.2222	36.76
9.2361	36.76
9.25	35.58
9.2639	35.27
9.2778	35.39
9.2917	35.45
9.3056	35.83
9.3195	36.08
9.3333	35.64
9.3472	35.08
9.3611	34.77
9.375	34.89
9.3889	34.71
9.4028	35.14
9.4167	34.71
9.4306	36.45
9.4445	36.76
9.4583	36.08
9.4722	35.58
9.4861	35.14
9.5	35.45
9.5139	35.08
9.5278	35.27
9.5417	34.77
9.5556	35.83
9.5695	35.52
9.5833	35.39
9.5972	35.45
9.6111	35.27
9.625	35.02
9.6389	35.39
9.6528	36.33
9.6667	36.26
9.6806	36.39
9.6945	36.02
9.7083	36.14
9.7222	36.45
9.7361	36.2
9.75	36.08
9.7639	37.01
9.7778	37.64
9.7917	37.01
9.8056	36.33
9.8195	35.83
9.8333	35.64
9.8472	35.2
9.8611	35.2
9.875	35.95
9.8889	36.26
9.9028	36.83
9.9167	37.39
9.9306	37.14
9.9445	37.57
9.9583	37.57
9.9722	36.83
9.9861	36.39
10	36.14
10.0139	36.51
10.0278	35.89
10.0417	36.08
10.0556	35.77
10.0695	36.2
10.0833	37.64
10.0972	36.83
10.1111	36.95
10.125	36.58
10.1389	35.95
10.1528	35.7
10.1667	35.77
10.1806	36.33
10.1945	35.83
10.2083	35.77
10.2222	36.33
10.2361	36.2
10.25	37.39
10.2639	36.51
10.2778	36.51
10.2917	36.33
10.3056	35.39
10.3195	35.08
10.3333	34.96
10.3472	35.02
10.3611	34.64
10.375	34.64
10.3889	35.08
10.4028	35.83
10.4167	36.02
10.4306	35.95
10.4445	35.39
10.4583	35.39
10.4722	35.02
10.4861	35.02
10.5	34.96
10.5139	35.08
10.5278	35.64
10.5417	35.64
10.5556	35.7
10.5695	35.64
10.5833	35.64
10.5972	35.27
10.6111	35.83
10.625	35.2
10.6389	36.2
10.6528	36.39
10.6667	35.83
10.6806	35.27
10.6945	35.52
10.7083	36.02
10.7222	35.77
10.7361	35.77
10.75	35.7
10.7639	36.39
10.7778	36.64
10.7917	36.89
10.8056	36.26
10.8195	36.2
10.8333	36.08
10.8472	35.7
10.8611	35.58
10.875	35.89
10.8889	36.08
10.9028	35.64
10.9167	36.89
10.9306	36.95
10.9445	37.51
10.9583	37.57
10.9722	37.82
10.9861	36.83
11	35.95
11.0139	35.95
11.0278	36.7
11.0417	37.14
11.0556	36.95
11.0695	36.26
11.0833	35.89
11.0972	35.7
11.1111	36.89
11.125	35.64
11.1389	35.45
11.1528	36.83
11.1667	37.2
11.1806	36.26
11.1945	37.01
11.2083	37.39
11.2222	36.89
11.2361	36.02
11.25	35.89
11.2639	35.52
11.2778	35.52
11.2917	35.45
11.3056	35.89
11.3195	36.33
11.3333	37.07
11.3472	36.76
11.3611	36.83
11.375	35.89
11.3889	35.39
11.4028	35.52
11.4167	34.64
11.4306	34.46
11.4445	37.2
11.4583	37.39
11.4722	36.83
11.4861	36.83
11.5	35.95
11.5139	35.58
11.5278	35.27
11.5417	35.27
11.5556	35.33
11.5695	35.58
11.5833	35.58
11.5972	35.89
11.6111	35.77
11.625	35.39
11.6389	35.39
11.6528	35.39
11.6667	35.33
11.6806	35.52
11.6945	35.89
11.7083	36.33
11.7222	36.51
11.7361	36.14
11.75	36.14
11.7639	37.51
11.7778	38.01
11.7917	37.57
11.8056	36.51
11.8195	35.89
11.8333	35.39
11.8472	35.7
11.8611	36.02
11.875	36.26
11.8889	36.26
11.9028	36.89
11.9167	37.14
11.9306	38.26
11.9445	37.7
11.9583	38.45
11.9722	37.88
11.9861	38.13
12	37.57
12.0139	36.58
12.0278	35.95
12.0417	35.7
12.0556	36.02
12.0695	36.2
12.0833	36.83
12.0972	36.58
12.1111	35.83
12.125	35.33
12.1389	35.52
12.1528	36.89
12.1667	37.01
12.1806	36.95
12.1945	37.51
12.2083	37.26
12.2222	36.08
12.2361	35.64
12.25	35.52
12.2639	36.02
12.2778	36.02
12.2917	36.39
12.3056	36.39
12.3195	36.2
12.3333	36.02
12.3472	35.45
12.3611	35.83
12.375	36.64
12.3889	36.08
12.4028	35.83
12.4167	35.52
12.4306	37.45
12.4445	35.64
12.4583	35.45
12.4722	35.27
12.4861	35.33
12.5	35.39
12.5139	35.52
12.5278	36.08
12.5417	36.39
12.5556	36.02
12.5695	36.02
12.5833	35.64
12.5972	35.95
12.6111	35.58
12.625	35.45
12.6389	35.77
12.6528	36.26
12.6667	36.02
12.6806	35.64
12.6945	35.7
12.7083	35.83
12.7222	36.26
12.7361	36.45
12.75	37.82
12.7639	37.26
12.7778	36.83
12.7917	36.33
12.8056	35.95
12.8195	36.58
12.8333	36.39
12.8472	35.83
12.8611	35.7
12.875	35.58
12.8889	36.14
12.9028	37.07
12.9167	36.89
12.9306	37.64
12.9445	37.82
12.9583	37.57
12.9722	38.07
12.9861	37.01
13	36.45
13.0139	36.26
13.0278	36.2
13.0417	37.01
13.0556	37.76
13.0695	37.51
13.0833	37.57
13.0972	36.64
13.1111	35.89
13.125	35.64
13.1389	36.45
13.1528	36.14
13.1667	35.77
13.1806	35.27
13.1945	36.08
13.2083	35.77
13.2222	37.07
13.2361	38.07
13.25	37.32
13.2639	36.33
13.2778	35.77
13.2917	35.27
13.3056	35.27
13.3195	35.33
13.3333	34.83
13.3472	36.14
13.3611	36.08
13.375	36.14
13.3889	35.7
13.4028	35.2
13.4167	34.77
13.4306	34.83
13.4445	34.21
13.4583	35.7
13.4722	35.52
13.4861	35.45
13.5	35.2
13.5139	35.27
13.5278	35.64
13.5417	35.64
13.5556	35.58
13.5695	36.26
13.5833	36.08
13.5972	35.58
13.6111	35.64
13.625	35.83
13.6389	36.08
13.6528	35.95
13.6667	35.77
13.6806	35.77
13.6945	36.51
13.7083	36.39
13.7222	36.45
13.7361	36.02
13.75	36.14
13.7639	36.89
13.7778	37.64
13.7917	36.95
13.8056	36.39
13.8195	36.02
13.8333	36.33
13.8472	35.89
13.8611	35.58
13.875	36.08
13.8889	37.07
13.9028	37.7
13.9167	37.57
13.9306	38.07
13.9445	37.82
13.9583	37.64
13.9722	37.14
13.9861	37.07
14	36.58
14.0139	36.08
14.0278	35.77
14.0417	36.26
14.0556	36.64
14.0695	36.14
14.0833	35.89
14.0972	37.64
14.1111	37.32
14.125	37.01
14.1389	36.51
14.1528	35.89
14.1667	35.77
14.1806	36.64
14.1945	35.77
14.2083	35.7
14.2222	35.7
14.2361	36.02
14.25	36.64
14.2639	36.95
14.2778	37.32
14.2917	37.01
14.3056	36.89
14.3195	36.14
14.3333	35.52
14.3472	35.33
14.3611	35.39
14.375	35.14
14.3889	34.83
14.4028	35.39
14.4167	35.14
14.4306	35.02
14.4445	34.77
14.4583	35.08
14.4722	34.71
14.4861	35.58
14.5	36.26
14.5139	35.64
14.5278	35.52
14.5417	35.27
14.5556	35.52
14.5695	35.39
14.5833	35.39
14.5972	35.27
14.6111	35.77
14.625	35.52
14.6389	35.58
14.6528	36.02
14.6667	35.95
14.6806	36.58
14.6945	36.26
14.7083	35.89
14.7222	35.45
14.7361	35.52
14.75	35.77
14.7639	36.7
14.7778	36.64
14.7917	36.51
14.8056	36.02
14.8195	35.83
14.8333	36.45
14.8472	36.2
14.8611	35.95
14.875	36.7
14.8889	37.51
14.9028	37.88
14.9167	37.88
14.9306	38.13
14.9445	37.64
14.9583	36.89
14.9722	36.26
14.9861	36.08
15	36.64
15.0139	36.51
15.0278	36.89
15.0417	37.26
15.0556	37.76
15.0695	37.45
15.0833	36.45
15.0972	35.52
15.1111	35.02
15.125	36.58
15.1389	37.01
15.1528	36.2
15.1667	35.77
15.1806	35.7
15.1945	37.2
15.2083	36.33
15.2222	35.45
15.2361	35.64
15.25	36.02
15.2639	37.76
15.2778	36.45
15.2917	36.39
15.3056	36.51
15.3195	35.7
15.3333	35.52
15.3472	35.14
15.3611	34.96
15.375	34.96
15.3889	34.89
15.4028	35.27
15.4167	35.45
15.4306	35.95
15.4445	35.7
15.4583	35.64
15.4722	35.77
15.4861	35.83
15.5	35.95
15.5139	35.58
15.5278	35.58
15.5417	35.45
15.5556	36.14
15.5695	36.33
15.5833	35.52
15.5972	35.08
15.6111	35.58
15.625	35.83
15.6389	36.14
15.6528	35.64
15.6667	35.7
15.6806	35.7
15.6945	35.83
15.7083	35.95
15.7222	35.64
15.7361	36.83
15.75	37.39
15.7639	37.07
15.7778	36.76
15.7917	35.77
15.8056	35.02
15.8195	35.83
15.8333	36.76
15.8472	35.77
15.8611	35.64
15.875	35.89
15.8889	36.89
15.9028	36.45
15.9167	36.58
15.9306	37.2
15.9445	37.7
15.9583	37.88
15.9722	37.26
15.9861	36.76
16	36.2
16.0139	35.95
16.0278	36.39
16.0417	36.76
16.0556	36.58
16.0695	37.07
16.0833	37.07
16.0972	36.64
16.1111	36.02
16.125	35.95
16.1389	35.89
16.1528	36.64
16.1667	35.58
16.1806	35.39
16.1945	35.77
16.2083	35.83
16.2222	35.7
16.2361	36.95
16.25	36.76
16.2639	36.51
16.2778	36.51
16.2917	35.89
16.3056	35.33
16.3195	35.14
16.3333	35.33
16.3472	35.2
16.3611	35.02
16.375	35.08
16.3889	35.14
16.4028	35.58
16.4167	34.64
16.4306	35.02
16.4445	34.46
16.4583	34.39
16.4722	34.71
16.4861	35.14
16.5	34.89
16.5139	35.39
16.5278	35.2
16.5417	35.14
16.5556	35.52
16.5695	35.39
16.5833	35.14
16.5972	35.33
16.6111	35.2
16.625	35.27
16.6389	35.45
16.6528	35.33
16.6667	35.2
16.6806	35.27
16.6945	35.45
16.7083	35.77
16.7222	35.45
16.7361	35.39
16.75	35.77
16.7639	35.52
16.7778	37.32
16.7917	36.33
16.8056	36.2
16.8195	37.26
16.8333	36.58
16.8472	36.39
16.8611	35.95
16.875	35.83
16.8889	35.83
16.9028	35.83
16.9167	36.26
16.9306	37.01
16.9445	36.7
16.9583	37.32
16.9722	37.14
16.9861	37.07
17	36.39
17.0139	35.95
17.0278	36.51
17.0417	36.26
17.0556	36.14
17.0695	36.26
17.0833	37.39
17.0972	37.26
17.1111	36.26
17.125	35.39
17.1389	35.39
17.1528	35.64
17.1667	36.08
17.1806	36.26
17.1945	36.02
17.2083	35.52
17.2222	35.39
17.2361	36.2
17.25	37.39
17.2639	37.01
17.2778	36.64
17.2917	35.77
17.3056	35.14
17.3195	35.58
17.3333	35.77
17.3472	35.64
17.3611	35.58
17.375	35.27
17.3889	35.27
17.4028	35.33
17.4167	35.08
17.4306	35.33
17.4445	35.45
17.4583	34.96
17.4722	35.52
17.4861	35.14
17.5	35.95
17.5139	35.58
17.5278	35.83
17.5417	34.96
17.5556	34.39
17.5695	35.58
17.5833	35.14
17.5972	35.95
17.6111	35.39
17.625	35.14
17.6389	34.71
17.6528	35.2
17.6667	35.39
17.6806	35.58
17.6945	35.77
17.7083	35.39
17.7222	35.58
17.7361	35.77
17.75	36.2
17.7639	35.89
17.7778	35.95
17.7917	36.33
17.8056	36.14
17.8195	36.08
17.8333	35.89
17.8472	35.52
17.8611	35.52
17.875	35.64
17.8889	36.02
17.9028	36.33
17.9167	36.33
17.9306	37.01
17.9445	37.32
17.9583	37.2
17.9722	37.45
17.9861	37.32
18	37.45
18.0139	36.95
18.0278	36.45
18.0417	35.7
18.0556	35.64
18.0695	36.58
18.0833	36.64
18.0972	36.14
18.1111	36.83
18.125	37.14
18.1389	37.01
18.1528	36.83
18.1667	36.51
18.1806	36.02
18.1945	35.83
18.2083	35.52
18.2222	35.33
18.2361	35.64
18.25	36.76
18.2639	36.26
18.2778	36.33
18.2917	35.64
18.3056	35.27
18.3195	34.83
18.3333	35.02
18.3472	35.33
18.3611	35.2
18.375	35.45
18.3889	35.14
18.4028	35.02
18.4167	35.02
18.4306	34.96
18.4445	34.64
18.4583	35.08
18.4722	35.83
18.4861	35.77
18.5	35.39
18.5139	35.2
18.5278	35.08
18.5417	34.96
18.5556	35.39
18.5695	35.14
18.5833	34.83
18.5972	34.89
18.6111	35.58
18.625	35.7
18.6389	35.27
18.6528	35.02
18.6667	35.33
18.6806	35.08
18.6945	35.83
18.7083	35.45
18.7222	35.39
18.7361	36.26
18.75	35.83
18.7639	36.02
18.7778	36.51
18.7917	36.26
18.8056	35.83
18.8195	35.64
18.8333	35.77
18.8472	36.02
18.8611	36.45
18.875	36.26
18.8889	36.76
18.9028	37.39
18.9167	37.32
18.9306	37.01
18.9445	36.64
18.9583	36.02
18.9722	35.77
18.9861	36.58
19	36.2
19.0139	35.95
19.0278	36.08
19.0417	37.32
19.0556	37.45
19.0695	36.83
19.0833	36.64
19.0972	36.14
19.1111	35.64
19.125	35.45
19.1389	36.33
19.1528	36.45
19.1667	36.76
19.1806	37.57
19.1945	37.07
19.2083	36.83
19.2222	36.08
19.2361	35.89
19.25	35.83
19.2639	35.89
19.2778	37.64
19.2917	36.76
19.3056	36.14
19.3195	35.2
19.3333	34.96
19.3472	35.27
19.3611	34.83
19.375	35.14
19.3889	35.2
19.4028	34.96
19.4167	34.77
19.4306	36.95
19.4445	36.7
19.4583	35.77
19.4722	35.08
19.4861	35.14
19.5	35.58
19.5139	35.64
19.5278	35.27
19.5417	35.08
19.5556	34.96
19.5695	35.2
19.5833	35.39
19.5972	35.45
19.6111	35.52
19.625	35.58
19.6389	35.45
19.6528	35.77
19.6667	35.39
19.6806	35.83
19.6945	36.08
19.7083	35.7
19.7222	35.39
19.7361	35.52
19.75	36.39
19.7639	35.58
19.7778	35.14
19.7917	35.2
19.8056	35.33
19.8195	35.89
19.8333	36.83
19.8472	36.58
19.8611	36.2
19.875	35.7
19.8889	36.7
19.9028	36.76
19.9167	37.7
19.9306	37.39
19.9445	37.14
19.9583	37.26
19.9722	37.88
19.9861	37.01
20	36.45
20.0139	35.58
20.0278	35.64
20.0417	36.26
20.0556	35.77
20.0695	35.52
20.0833	35.52
20.0972	35.64
20.1111	37.51
20.125	37.32
20.1389	36.08
20.1528	35.83
20.1667	35.7
20.1806	35.7
20.1945	35.89
20.2083	36.33
20.2222	37.82
20.2361	37.82
20.25	37.32
20.2639	36.83
20.2778	36.64
20.2917	35.95
20.3056	35.58
20.3195	35.2
20.3333	35.08
20.3472	34.96
20.3611	35.2
20.375	35.14
20.3889	35.14
20.4028	35.39
20.4167	35.39
20.4306	35.14
20.4445	35.64
20.4583	36.14
20.4722	36.02
20.4861	35.52
20.5	35.08
20.5139	35.02
20.5278	34.89
20.5417	34.89
20.5556	35.45
20.5695	34.96
20.5833	35.08
20.5972	35.27
20.6111	35.39
20.625	35.7
20.6389	35.33
20.6528	35.27
20.6667	35.2
20.6806	35.45
20.6945	35.7
20.7083	35.95
20.7222	36.2
20.7361	35.58
20.75	35.52
20.7639	36.26
20.7778	36.95
20.7917	36.45
20.8056	35.89
20.8195	35.33
20.8333	36.14
20.8472	35.64
20.8611	35.52
20.875	35.58
20.8889	35.58
20.9028	36.39
20.9167	36.33
20.9306	36.08
20.9445	37.07
20.9583	37.57
20.9722	37.64
20.9861	37.76
21	37.45
21.0139	36.58
21.0278	35.89
21.0417	36.02
21.0556	36.2
21.0695	37.01
21.0833	36.76
21.0972	36.33
21.1111	35.89
21.125	35.58
21.1389	35.02
21.1528	35.27
21.1667	36.08
21.1806	35.95
21.1945	35.7
21.2083	37.01
21.2222	36.95
21.2361	36.64
21.25	36.39
21.2639	36.26
21.2778	36.02
21.2917	37.01
21.3056	36.76
21.3195	36.33
21.3333	36.33
21.3472	36.08
21.3611	35.2
21.375	35.39
21.3889	35.2
21.4028	34.83
21.4167	35.02
21.4306	34.58
21.4445	34.89
21.4583	34.46
21.4722	35.39
21.4861	35.27
21.5	34.89
21.5139	35.64
21.5278	35.64
21.5417	35.45
21.5556	35.14
21.5695	35.02
21.5833	34.96
21.5972	35.02
21.6111	35.2
21.625	35.2
21.6389	35.58
21.6528	35.45
21.6667	36.14
21.6806	36.2
21.6945	35.95
21.7083	35.7
21.7222	35.64
21.7361	35.89
21.75	36.89
21.7639	36.39
21.7778	35.83
21.7917	35.77
21.8056	35.7
21.8195	35.39
21.8333	36.14
21.8472	35.52
21.8611	35.45
21.875	36.45
21.8889	36.7
21.9028	37.82
21.9167	37.64
21.9306	37.57
21.9445	37.32
21.9583	36.58
21.9722	35.83
21.9861	35.45
22	35.33
22.0139	35.95
22.0278	36.58
22.0417	36.64
22.0556	35.89
22.0695	35.45
22.0833	36.14
22.0972	36.39
22.1111	36.51
22.125	37.32
22.1389	37.2
22.1528	36.89
22.1667	36.45
22.1806	35.77
22.1945	35.52
22.2083	36.08
22.2222	36.76
22.2361	37.51
22.25	36.26
22.2639	36.39
22.2778	35.89
22.2917	35.14
22.3056	35.33
22.3195	35.77
22.3333	35.89
22.3472	35.77
22.3611	34.89
22.375	34.89
22.3889	34.71
22.4028	35.7
22.4167	35.77
22.4306	35.52
22.4445	34.96
22.4583	34.71
22.4722	34.71
22.4861	34.89
22.5	35.08
22.5139	34.71
22.5278	35.02
22.5417	35.2
22.5556	35.77
22.5695	35.33
22.5833	35.7
22.5972	35.27
22.6111	35.08
22.625	34.83
22.6389	34.89
22.6528	35.83
22.6667	35.39
22.6806	35.45
22.6945	35.2
22.7083	35.27
22.7222	35.39
22.7361	35.83
22.75	36.51
22.7639	35.89
22.7778	36.33
22.7917	35.89
22.8056	35.33
22.8195	35.64
22.8333	35.14
22.8472	35.83
22.8611	36.95
22.875	36.89
22.8889	36.51
22.9028	35.89
22.9167	35.27
22.9306	35.2
22.9445	35.2
22.9583	35.08
22.9722	34.77
22.9861	35.27
23	37.32
23.0139	36.95
23.0278	37.64
23.0417	36.45
23.0556	36.39
23.0695	35.58
23.0833	35.45
23.0972	35.33
23.1111	35.45
23.125	36.45
23.1389	37.26
23.1528	37.07
23.1667	36.02
23.1806	35.77
23.1945	35.39
23.2083	35.39
23.2222	35.2
23.2361	35.83
23.25	36.39
23.2639	35.7
23.2778	33.9
23.2917	32.65
23.3056	31.21
23.3195	29.78
23.3333	28.28
23.3472	27.09
23.3611	25.34
23.375	23.9
23.3889	22.59
23.4028	21.28
23.4167	20.09
23.4306	19.02
23.4445	17.96
23.4583	16.96
23.4722	16.02
23.4861	15.14
23.5	14.33
23.5139	13.58
23.5278	12.89
23.5417	12.2
23.5556	11.57
23.5695	11.63
23.5833	12.2
23.5972	13.7
23.6111	20.71
23.625	32.65
23.6389	35.02
23.6528	35.14
23.6667	35.2
23.6806	34.83
23.6945	34.89
23.7083	34.83
23.7222	35.27
23.7361	34.71
23.75	35.27
23.7639	35.83
23.7778	35.89
23.7917	35.08
23.8056	34.83
23.8195	35.39
23.8333	35.02
23.8472	35.33
23.8611	35.45
23.875	35.77
23.8889	35.14
23.9028	34.39
23.9167	34.64
23.9306	35.02
23.9445	35.08
23.9583	34.83
23.9722	34.77
23.9861	34.96
24	35.77
24.0139	36.2
24.0278	36.64
24.0417	37.26
24.0556	36.76
24.0695	35.95
24.0833	35.2
24.0972	35.2
24.1111	35.08
24.125	34.77
24.1389	34.64
24.1528	35.83
24.1667	35.7
24.1806	35.7
24.1945	35.58
24.2083	35.89
24.2222	36.02
24.2361	37.14
24.25	36.64
24.2639	35.83
24.2778	35.08
24.2917	33.27
24.3056	32.02
24.3195	30.65
24.3333	29.65
24.3472	27.59
24.3611	26.03
24.375	24.47
24.3889	22.9
24.4028	21.53
24.4167	20.21
24.4306	18.9
24.4445	17.71
24.4583	16.65
24.4722	15.71
24.4861	14.77
24.5	13.95
24.5139	13.26
24.5278	12.57
24.5417	11.88
24.5556	11.32
24.5695	10.88
24.5833	10.44
24.5972	10
24.6111	9.56
24.625	9.31
24.6389	9.06
24.6528	8.87
24.6667	8.68
24.6806	8.62
24.6945	8.43
24.7083	8.37
24.7222	8.31
24.7361	8.24
24.75	8.18
24.7639	8.12
24.7778	8.06
24.7917	7.93
24.8056	7.93
24.8195	7.87
24.8333	7.87
24.8472	7.87
24.8611	7.74
24.875	7.74
24.8889	7.74
24.9028	7.74
24.9167	7.74
24.9306	7.74
24.9445	7.8
24.9583	7.8
24.9722	7.87
24.9861	7.93
25	7.99
25.0139	7.99
25.0278	7.99
25.0417	7.99
25.0556	8.06
25.0695	8.06
25.0833	8.12
25.0972	8.12
25.1111	8.18
25.125	8.24
25.1389	8.24
25.1528	8.24
25.1667	8.31
25.1806	8.31
25.1945	8.31
25.2083	8.37
25.2222	8.37
25.2361	8.37
25.25	8.43
25.2639	8.43
25.2778	8.43
25.2917	8.49
25.3056	8.49
25.3195	8.49
25.3333	8.49
25.3472	8.43
25.3611	8.37
25.375	8.37
25.3889	8.31
25.4028	8.24
25.4167	8.18
25.4306	8.12
25.4445	7.99
25.4583	7.93
25.4722	7.8
25.4861	7.74
25.5	7.68
25.5139	7.55
25.5278	7.43
25.5417	7.3
25.5556	7.24
25.5695	7.11
25.5833	7.05
25.5972	6.99
25.6111	6.86
25.625	6.8
25.6389	6.8
25.6528	6.74
25.6667	6.74
25.6806	6.67
25.6945	6.55
25.7083	6.55
25.7222	6.61
25.7361	6.61
25.75	6.67
25.7639	6.74
25.7778	6.8
25.7917	6.86
25.8056	6.99
25.8195	7.05
25.8333	7.11
25.8472	7.18
25.8611	7.18
25.875	7.24
25.8889	7.36
25.9028	7.43
25.9167	7.49
25.9306	7.68
25.9445	7.99
25.9583	8.87
25.9722	9.81
25.9861	11.32
26	15.2
26.0139	27.72
26.0278	34.71
26.0417	35.95
26.0556	35.58
26.0695	35.77
26.0833	35.52
26.0972	35.39
26.1111	36.14
26.125	35.89
26.1389	35.27
26.1528	35.27
26.1667	35.27
26.1806	35.58
26.1945	35.64
26.2083	35.77
26.2222	36.33
26.2361	36.51
26.25	36.2
26.2639	35.33
26.2778	35.2
26.2917	35.58
26.3056	35.2
26.3195	35.08
26.3333	35.77
26.3472	35.89
26.3611	36.58
26.375	36.51
26.3889	36.08
26.4028	35.33
26.4167	35.27
26.4306	35.33
26.4445	35.89
26.4583	36.83
26.4722	36.95
26.4861	37.07
26.5	36.95
26.5139	36.02
26.5278	34.71
26.5417	33.65
26.5556	32.4
26.5695	31.65
26.5833	29.71
26.5972	28.59
26.6111	26.9
26.625	25.53
26.6389	24.03
26.6528	22.78
26.6667	21.53
26.6806	20.34
26.6945	19.28
26.7083	18.34
26.7222	17.46
26.7361	16.65
26.75	15.96
26.7639	15.33
26.7778	14.77
26.7917	14.26
26.8056	13.83
26.8195	13.32
26.8333	12.95
26.8472	12.57
26.8611	12.2
26.875	11.88
26.8889	11.69
26.9028	11.38
26.9167	11.19
26.9306	11
26.9445	10.82
26.9583	10.69
26.9722	10.57
26.9861	10.38
27	10.31
27.0139	10.19
27.0278	10.06
27.0417	10
27.0556	9.94
27.0695	9.81
27.0833	9.75
27.0972	9.75
27.1111	9.69
27.125	9.62
27.1389	9.62
27.1528	9.56
27.1667	9.5
27.1806	9.44
27.1945	9.44
27.2083	9.37
27.2222	9.37
27.2361	9.37
27.25	9.31
27.2639	9.31
27.2778	9.31
27.2917	9.25
27.3056	9.25
27.3195	9.25
27.3333	9.18
27.3472	9.12
27.3611	9.06
27.375	9.06
27.3889	8.93
27.4028	8.87
27.4167	8.81
27.4306	8.68
27.4445	8.62
27.4583	8.56
27.4722	8.43
27.4861	8.31
27.5	8.24
27.5139	8.18
27.5278	8.12
27.5417	8.12
27.5556	8.06
27.5695	7.99
27.5833	7.99
27.5972	7.93
27.6111	7.87
27.625	7.8
27.6389	7.68
27.6528	7.62
27.6667	7.62
27.6806	7.49
27.6945	7.36
27.7083	7.24
27.7222	7.24
27.7361	7.18
27.75	7.11
27.7639	7.11
27.7778	7.11
27.7917	7.05
27.8056	7.05
27.8195	7.05
27.8333	7.11
27.8472	7.11
27.8611	7.11
27.875	7.18
27.8889	7.18
27.9028	7.18
27.9167	7.24
27.9306	7.24
27.9445	7.24
27.9583	7.3
27.9722	7.36
27.9861	7.36
28	7.43
28.0139	7.43
28.0278	7.49
28.0417	7.55
28.0556	7.55
28.0695	7.62
28.0833	7.68
28.0972	7.68
28.1111	7.74
28.125	7.8
28.1389	7.8
28.1528	7.87
28.1667	7.87
28.1806	7.87
28.1945	7.87
28.2083	7.93
28.2222	7.87
28.2361	7.93
28.25	7.93
28.2639	7.93
28.2778	7.99
28.2917	7.99
28.3056	7.99
28.3195	7.99
28.3333	7.99
28.3472	7.87
28.3611	7.87
28.375	7.8
28.3889	7.68
28.4028	7.62
28.4167	7.49
28.4306	7.3
28.4445	7.11
28.4583	6.99
28.4722	6.8
28.4861	6.61
28.5	6.42
28.5139	6.23
28.5278	6.05
28.5417	5.86
28.5556	5.73
28.5695	5.67
28.5833	5.54
28.5972	5.36
28.6111	5.29
28.625	5.23
28.6389	5.23
28.6528	5.1
28.6667	5.04
28.6806	4.98
28.6945	4.92
28.7083	4.98
28.7222	4.98
[truncated: 6,128 more rows]

## Sheet: 8C_AN3
0.9583	9.82
0.9722	9.63
0.9861	9.57
1	9.44
1.0139	9.38
1.0278	9.32
1.0417	9.25
1.0556	9.19
1.0695	9.13
1.0833	9.07
1.0972	9.07
1.1111	9
1.125	8.94
1.1389	8.88
1.1528	8.88
1.1667	8.88
1.1806	8.82
1.1945	8.82
1.2083	8.82
1.2222	8.82
1.2361	8.75
1.25	8.82
1.2639	8.82
1.2778	8.75
1.2917	8.75
1.3056	8.75
1.3195	8.63
1.3333	8.63
1.3472	8.5
1.3611	8.38
1.375	8.31
1.3889	8.13
1.4028	7.94
1.4167	7.81
1.4306	7.62
1.4445	7.5
1.4583	7.31
1.4722	7.06
1.4861	6.87
1.5	6.75
1.5139	6.62
1.5278	6.43
1.5417	6.31
1.5556	6.18
1.5695	6.06
1.5833	5.99
1.5972	5.93
1.6111	5.87
1.625	5.74
1.6389	5.68
1.6528	5.68
1.6667	5.62
1.6806	5.56
1.6945	5.56
1.7083	5.62
1.7222	5.74
1.7361	6.06
1.75	6.37
1.7639	6.94
1.7778	7.62
1.7917	8.44
1.8056	9.57
1.8195	11.13
1.8333	13.33
1.8472	20.53
1.8611	31.9
1.875	34.77
1.8889	35.33
1.9028	35.27
1.9167	35.27
1.9306	35.14
1.9445	35.71
1.9583	35.83
1.9722	35.83
1.9861	36.27
2	35.83
2.0139	35.21
2.0278	35.27
2.0417	35.02
2.0556	35.02
2.0695	35.58
2.0833	35.52
2.0972	35.14
2.1111	35.27
2.125	35.39
2.1389	35.89
2.1528	36.39
2.1667	36.77
2.1806	36.02
2.1945	36.7
2.2083	36.14
2.2222	35.39
2.2361	34.64
2.25	34.71
2.2639	34.83
2.2778	35.08
2.2917	34.77
2.3056	35.02
2.3195	35.52
2.3333	36.02
2.3472	36.02
2.3611	36.14
2.375	35.89
2.3889	35.77
2.4028	34.46
2.4167	34.46
2.4306	36.45
2.4445	36.83
2.4583	37.02
2.4722	36.27
2.4861	36.2
2.5	35.77
2.5139	35.14
2.5278	35.02
2.5417	34.96
2.5556	34.96
2.5695	34.71
2.5833	34.64
2.5972	35.39
2.6111	35.02
2.625	35.02
2.6389	34.89
2.6528	35.33
2.6667	35.33
2.6806	34.96
2.6945	34.96
2.7083	34.96
2.7222	36.2
2.7361	35.46
2.75	35.83
2.7639	35.39
2.7778	35.27
2.7917	35.64
2.8056	35.96
2.8195	35.52
2.8333	35.96
2.8472	35.58
2.8611	34.89
2.875	35.14
2.8889	34.64
2.9028	34.96
2.9167	35.71
2.9306	35.27
2.9445	35.08
2.9583	35.21
2.9722	35.89
2.9861	36.08
3	36.89
3.0139	36.77
3.0278	37.2
3.0417	36.27
3.0556	35.77
3.0695	35.33
3.0833	34.52
3.0972	34.21
3.1111	34.21
3.125	34.46
3.1389	33.27
3.1528	32.4
3.1667	31.09
3.1806	29.65
3.1945	28.28
3.2083	26.72
3.2222	25.4
3.2361	24.15
3.25	23.03
3.2639	21.84
3.2778	20.84
3.2917	19.84
3.3056	18.96
3.3195	18.15
3.3333	17.4
3.3472	16.65
3.3611	16.02
3.375	15.46
3.3889	14.89
3.4028	14.45
3.4167	13.95
3.4306	13.45
3.4445	13.01
3.4583	12.7
3.4722	12.39
3.4861	12.01
3.5	11.82
3.5139	11.51
3.5278	11.32
3.5417	11.13
3.5556	10.95
3.5695	10.76
3.5833	10.63
3.5972	10.45
3.6111	10.26
3.625	10.07
3.6389	10.01
3.6528	9.88
3.6667	9.82
3.6806	9.69
3.6945	9.63
3.7083	9.57
3.7222	9.51
3.7361	9.51
3.75	9.44
3.7639	9.38
3.7778	9.25
3.7917	9.25
3.8056	9.19
3.8195	9.13
3.8333	9.13
3.8472	9.13
3.8611	9.07
3.875	9.07
3.8889	9.07
3.9028	9.07
3.9167	9.07
3.9306	9
3.9445	9
3.9583	9
3.9722	9
3.9861	9
4	9
4.0139	9
4.0278	9
4.0417	9
4.0556	9
4.0695	9
4.0833	9
4.0972	8.94
4.1111	8.94
4.125	8.94
4.1389	9
4.1528	8.94
4.1667	8.94
4.1806	9
4.1945	8.94
4.2083	8.94
4.2222	9
4.2361	8.94
4.25	8.94
4.2639	8.94
4.2778	8.94
4.2917	8.94
4.3056	8.88
4.3195	8.88
4.3333	8.88
4.3472	8.82
4.3611	8.82
4.375	8.75
4.3889	8.69
4.4028	8.63
4.4167	8.57
4.4306	8.44
4.4445	8.25
4.4583	8.19
4.4722	8.13
4.4861	7.94
4.5	7.81
4.5139	7.75
4.5278	7.56
4.5417	7.44
4.5556	7.37
4.5695	7.25
4.5833	7.12
4.5972	7.06
4.6111	6.94
4.625	6.87
4.6389	6.81
4.6528	6.75
4.6667	6.68
4.6806	6.68
4.6945	6.68
4.7083	6.68
4.7222	6.75
4.7361	6.81
4.75	6.81
4.7639	6.75
4.7778	6.75
4.7917	6.75
4.8056	6.87
4.8195	6.87
4.8333	6.94
4.8472	7
4.8611	7.06
4.875	7.19
4.8889	7.19
4.9028	7.25
4.9167	7.31
4.9306	7.31
4.9445	7.37
4.9583	7.44
4.9722	7.44
4.9861	7.5
5	7.56
5.0139	7.62
5.0278	7.69
5.0417	7.75
5.0556	7.75
5.0695	7.88
5.0833	7.88
5.0972	7.88
5.1111	7.94
5.125	8
5.1389	8
5.1528	8.06
5.1667	8.13
5.1806	8.13
5.1945	8.13
5.2083	8.19
5.2222	8.19
5.2361	8.19
5.25	8.25
5.2639	8.19
5.2778	8.19
5.2917	8.19
5.3056	8.19
5.3195	8.25
5.3333	8.13
5.3472	8.13
5.3611	8.13
5.375	8
5.3889	8
5.4028	7.81
5.4167	7.75
5.4306	7.56
5.4445	7.44
5.4583	7.31
5.4722	7.19
5.4861	7
5.5	6.94
5.5139	6.87
5.5278	6.68
5.5417	6.56
5.5556	6.5
5.5695	6.43
5.5833	6.37
5.5972	6.31
5.6111	6.18
5.625	6.12
5.6389	6.12
5.6528	5.99
5.6667	5.93
5.6806	5.93
5.6945	5.81
5.7083	5.81
5.7222	5.87
5.7361	5.81
5.75	5.81
5.7639	5.74
5.7778	5.74
5.7917	5.93
5.8056	6.31
5.8195	6.68
5.8333	7.31
5.8472	8.06
5.8611	9.07
5.875	10.26
5.8889	11.57
5.9028	12.7
5.9167	14.77
5.9306	21.84
5.9445	31.34
5.9583	34.27
5.9722	35.14
5.9861	35.46
6	35.83
6.0139	36.27
6.0278	36.02
6.0417	36.14
6.0556	35.96
6.0695	35.96
6.0833	35.46
6.0972	35.96
6.1111	35.77
6.125	36.14
6.1389	35.83
6.1528	35.77
6.1667	36.64
6.1806	36.33
6.1945	35.96
6.2083	36.14
6.2222	36.27
6.2361	36.77
6.25	36.83
6.2639	37.02
6.2778	36.7
6.2917	36.2
6.3056	35.77
6.3195	36.14
6.3333	35.96
6.3472	35.71
6.3611	35.27
6.375	35.27
6.3889	35.27
6.4028	34.89
6.4167	34.52
6.4306	35.02
6.4445	34.46
6.4583	34.46
6.4722	34.08
6.4861	34.89
6.5	34.89
6.5139	35.46
6.5278	35.39
6.5417	34.83
6.5556	36.08
6.5695	35.64
6.5833	35.14
6.5972	35.33
6.6111	34.89
6.625	34.64
6.6389	34.58
6.6528	34.89
6.6667	34.33
6.6806	34.21
6.6945	35.33
6.7083	35.08
6.7222	35.02
6.7361	34.33
6.75	33.77
6.7639	32.96
6.7778	31.46
6.7917	29.78
6.8056	28.4
6.8195	26.9
6.8333	25.28
6.8472	23.84
6.8611	22.53
6.875	21.21
6.8889	20.03
6.9028	18.96
6.9167	17.96
6.9306	17.02
6.9445	16.15
6.9583	15.39
6.9722	14.71
6.9861	14.02
7	13.45
7.0139	13.01
7.0278	12.51
7.0417	12.07
7.0556	11.76
7.0695	11.39
7.0833	11.07
7.0972	10.76
7.1111	10.51
7.125	10.26
7.1389	10.07
7.1528	9.94
7.1667	9.82
7.1806	9.69
7.1945	9.57
7.2083	9.51
7.2222	9.44
7.2361	9.38
7.25	9.32
7.2639	9.19
7.2778	9.13
7.2917	9.07
7.3056	9
7.3195	8.94
7.3333	8.88
7.3472	8.75
7.3611	8.63
7.375	8.5
7.3889	8.31
7.4028	8.19
7.4167	8
7.4306	7.81
7.4445	7.62
7.4583	7.37
7.4722	7.19
7.4861	7
7.5	6.81
7.5139	6.62
7.5278	6.37
7.5417	6.25
7.5556	6.12
7.5695	5.93
7.5833	5.81
7.5972	5.68
7.6111	5.56
7.625	5.49
7.6389	5.43
7.6528	5.43
7.6667	5.37
7.6806	5.3
7.6945	5.3
7.7083	5.37
7.7222	5.37
7.7361	5.37
7.75	5.37
7.7639	5.37
7.7778	5.37
7.7917	5.37
7.8056	5.49
7.8195	5.56
7.8333	5.62
7.8472	5.74
7.8611	5.87
7.875	5.99
7.8889	6.12
7.9028	6.25
7.9167	6.37
7.9306	6.37
7.9445	6.5
7.9583	6.56
7.9722	6.68
7.9861	6.75
8	6.87
8.0139	7
8.0278	7.12
8.0417	7.19
8.0556	7.31
8.0695	7.37
8.0833	7.44
8.0972	7.44
8.1111	7.44
8.125	7.56
8.1389	7.56
8.1528	7.62
8.1667	7.69
8.1806	7.75
8.1945	7.81
8.2083	7.81
8.2222	7.88
8.2361	7.88
8.25	7.88
8.2639	7.88
8.2778	7.88
8.2917	7.88
8.3056	7.88
8.3195	7.94
8.3333	7.94
8.3472	7.94
8.3611	7.94
8.375	7.88
8.3889	7.88
8.4028	7.81
8.4167	7.75
8.4306	7.62
8.4445	7.56
8.4583	7.56
8.4722	7.5
8.4861	7.5
8.5	7.56
8.5139	7.56
8.5278	7.62
8.5417	7.62
8.5556	7.62
8.5695	7.62
8.5833	7.62
8.5972	7.56
8.6111	7.5
8.625	7.44
8.6389	7.31
8.6528	7.19
8.6667	7
8.6806	6.81
8.6945	6.75
8.7083	6.68
8.7222	6.62
8.7361	6.56
8.75	6.5
8.7639	6.43
8.7778	6.37
8.7917	6.37
8.8056	6.43
8.8195	6.37
8.8333	6.37
8.8472	6.5
8.8611	6.5
8.875	6.56
8.8889	6.68
8.9028	6.75
8.9167	6.75
8.9306	6.81
8.9445	6.87
8.9583	6.94
8.9722	7.06
8.9861	7.12
9	7.19
9.0139	7.25
9.0278	7.31
9.0417	7.37
9.0556	7.44
9.0695	7.5
9.0833	7.5
9.0972	7.5
9.1111	7.56
9.125	7.62
9.1389	7.62
9.1528	7.69
9.1667	7.69
9.1806	7.75
9.1945	7.81
9.2083	7.81
9.2222	7.88
9.2361	7.94
9.25	7.94
9.2639	8
9.2778	8
9.2917	8
9.3056	8
9.3195	8
9.3333	7.94
9.3472	7.88
9.3611	7.75
9.375	7.69
9.3889	7.56
9.4028	7.44
9.4167	7.37
9.4306	7.62
9.4445	8.06
9.4583	8.75
9.4722	9.76
9.4861	10.88
9.5	12.14
9.5139	14.52
9.5278	21.03
9.5417	29.34
9.5556	33.9
9.5695	34.58
9.5833	35.46
9.5972	35.46
9.6111	35.27
9.625	35.64
9.6389	35.58
9.6528	35.33
9.6667	35.52
9.6806	36.39
9.6945	36.08
9.7083	35.39
9.7222	36.02
9.7361	35.52
9.75	35.27
9.7639	35.52
9.7778	35.83
9.7917	35.33
9.8056	35.27
9.8195	35.58
9.8333	35.77
9.8472	35.64
9.8611	35.64
9.875	36.83
9.8889	36.58
9.9028	36.39
9.9167	36.14
9.9306	36.27
9.9445	36.2
9.9583	35.64
9.9722	35.89
9.9861	35.08
10	35.64
10.0139	35.64
10.0278	36.14
10.0417	35.64
10.0556	35.27
10.0695	34.21
10.0833	33.46
10.0972	34.15
10.1111	34.15
10.125	34.96
10.1389	34.89
10.1528	36.08
10.1667	36.08
10.1806	36.39
10.1945	35.08
10.2083	34.15
10.2222	33.08
10.2361	31.84
10.25	30.84
10.2639	29.46
10.2778	28.09
10.2917	26.72
10.3056	25.53
10.3195	24.22
10.3333	23.03
10.3472	21.84
10.3611	20.78
10.375	19.84
10.3889	18.96
10.4028	18.15
10.4167	17.33
10.4306	16.58
10.4445	15.96
10.4583	15.33
10.4722	14.77
10.4861	14.27
10.5	13.83
10.5139	13.39
10.5278	12.95
10.5417	12.58
10.5556	12.2
10.5695	11.76
10.5833	11.39
10.5972	11.01
10.6111	10.76
10.625	10.51
10.6389	10.32
10.6528	10.07
10.6667	9.94
10.6806	9.82
10.6945	9.69
10.7083	9.57
10.7222	9.51
10.7361	9.38
10.75	9.25
10.7639	9.13
10.7778	9.13
10.7917	9.07
10.8056	9
10.8195	8.94
10.8333	8.94
10.8472	8.94
10.8611	8.94
10.875	8.88
10.8889	8.88
10.9028	8.88
10.9167	8.82
10.9306	8.82
10.9445	8.82
10.9583	8.75
10.9722	8.82
10.9861	8.75
11	8.75
11.0139	8.75
11.0278	8.75
11.0417	8.75
11.0556	8.75
11.0695	8.75
11.0833	8.69
11.0972	8.69
11.1111	8.75
11.125	8.69
11.1389	8.75
11.1528	8.75
11.1667	8.75
11.1806	8.75
11.1945	8.75
11.2083	8.75
11.2222	8.82
11.2361	8.75
11.25	8.75
11.2639	8.75
11.2778	8.75
11.2917	8.75
11.3056	8.82
11.3195	8.75
11.3333	8.75
11.3472	8.75
11.3611	8.75
11.375	8.69
11.3889	8.69
11.4028	8.63
11.4167	8.5
11.4306	8.5
11.4445	9.13
11.4583	9.82
11.4722	10.95
11.4861	15.08
11.5	22.15
11.5139	33.52
11.5278	35.14
11.5417	35.39
11.5556	35.77
11.5695	35.39
11.5833	35.96
11.5972	35.71
11.6111	35.58
11.625	35.52
11.6389	35.52
11.6528	35.71
11.6667	35.46
11.6806	35.27
11.6945	35.71
11.7083	35.89
11.7222	35.39
11.7361	35.08
11.75	35.02
11.7639	35.08
11.7778	34.77
11.7917	35.21
11.8056	35.58
11.8195	35.14
11.8333	35.83
11.8472	35.52
11.8611	35.27
11.875	35.21
11.8889	35.02
11.9028	36.58
11.9167	36.89
11.9306	36.52
11.9445	36.39
11.9583	36.45
11.9722	36.39
11.9861	36.08
12	35.71
12.0139	35.27
12.0278	35.14
12.0417	35.39
12.0556	35.08
12.0695	35.21
12.0833	35.02
12.0972	35.21
12.1111	36.83
12.125	36.77
12.1389	35.33
12.1528	35.89
12.1667	35.77
12.1806	35.33
12.1945	35.02
12.2083	35.46
12.2222	36.08
12.2361	36.14
12.25	36.2
12.2639	36.33
12.2778	35.96
12.2917	35.52
12.3056	35.46
12.3195	35.46
12.3333	35.33
12.3472	35.33
12.3611	35.71
12.375	35.52
12.3889	35.21
12.4028	35.46
12.4167	35.64
12.4306	36.14
12.4445	36.52
12.4583	36.64
12.4722	35.46
12.4861	35.27
12.5	35.46
12.5139	34.96
12.5278	34.83
12.5417	35.77
12.5556	35.33
12.5695	35.33
12.5833	35.83
12.5972	36.02
12.6111	36.33
12.625	35.89
12.6389	35.52
12.6528	35.46
12.6667	35.39
12.6806	35.83
12.6945	37.39
12.7083	36.77
12.7222	36.64
12.7361	36.08
12.75	36.64
12.7639	36.45
12.7778	36.14
12.7917	36.02
12.8056	36.14
12.8195	36.27
12.8333	36.08
12.8472	36.45
12.8611	36.64
12.875	36.52
12.8889	35.89
12.9028	36.39
12.9167	36.33
12.9306	36.45
12.9445	36.7
12.9583	36.64
12.9722	36.27
12.9861	35.96
13	36.02
13.0139	36.02
13.0278	36.39
13.0417	36.33
13.0556	35.83
13.0695	37.08
13.0833	35.89
13.0972	36.58
13.1111	36.52
13.125	36.2
13.1389	36.39
13.1528	36.58
13.1667	36.95
13.1806	36.58
13.1945	36.7
13.2083	37.14
13.2222	36.77
13.2361	36.27
13.25	37.39
13.2639	36.89
13.2778	36.7
13.2917	36.58
13.3056	36.27
13.3195	36.08
13.3333	36.02
13.3472	36.27
13.3611	36.27
13.375	35.58
13.3889	35.21
13.4028	35.02
13.4167	35.46
13.4306	35.71
13.4445	36.27
13.4583	35.58
13.4722	35.27
13.4861	35.46
13.5	35.64
13.5139	36.08
13.5278	36.08
13.5417	35.58
13.5556	35.39
13.5695	35.02
13.5833	34.71
13.5972	35.02
13.6111	35.33
13.625	35.52
13.6389	36.27
13.6528	35.96
13.6667	35.58
13.6806	35.64
13.6945	35.83
13.7083	36.14
13.7222	36.02
13.7361	36.39
13.75	35.89
13.7639	35.58
13.7778	35.46
13.7917	35.58
13.8056	36.64
13.8195	36.39
13.8333	36.58
13.8472	36.45
13.8611	36.39
13.875	36.14
13.8889	35.83
13.9028	35.83
13.9167	35.89
13.9306	35.83
13.9445	36.45
13.9583	36.58
13.9722	36.83
13.9861	36.77
14	36.58
14.0139	36.08
14.0278	35.96
14.0417	36.08
14.0556	36.33
14.0695	36.33
14.0833	37.02
14.0972	36.95
14.1111	36.39
14.125	35.77
14.1389	36.14
14.1528	36.02
14.1667	36.64
14.1806	36.7
14.1945	35.77
14.2083	35.33
14.2222	34.89
14.2361	34.96
14.25	35.02
14.2639	34.71
14.2778	34.89
14.2917	35.02
14.3056	35.21
14.3195	35.14
14.3333	34.89
14.3472	35.58
14.3611	35.52
14.375	35.52
14.3889	34.83
14.4028	35.14
14.4167	34.89
14.4306	34.58
14.4445	35.64
14.4583	35.83
14.4722	35.39
14.4861	35.39
14.5	34.89
14.5139	35.33
14.5278	34.58
14.5417	34.71
14.5556	34.77
14.5695	35.46
14.5833	35.33
14.5972	35.27
14.6111	35.33
14.625	36.14
14.6389	35.71
14.6528	35.58
14.6667	35.46
14.6806	35.46
14.6945	34.83
14.7083	35.64
14.7222	36.45
14.7361	36.08
14.75	35.52
14.7639	35.08
14.7778	35.39
14.7917	36.2
14.8056	35.83
14.8195	35.77
14.8333	35.64
14.8472	35.77
14.8611	36.45
14.875	37.26
14.8889	37.2
14.9028	36.89
14.9167	36.95
14.9306	37.02
14.9445	36.45
14.9583	37.02
14.9722	37.08
14.9861	37.14
15	36.64
15.0139	36.39
15.0278	36.08
15.0417	36.2
15.0556	36.58
15.0695	36.58
15.0833	36.64
15.0972	36.95
15.1111	37.08
15.125	36.7
15.1389	35.89
15.1528	34.77
15.1667	34.33
15.1806	34.96
15.1945	35.64
15.2083	36.27
15.2222	35.64
15.2361	35.08
15.25	34.96
15.2639	35.58
15.2778	35.89
15.2917	35.52
15.3056	35.33
15.3195	35.02
15.3333	34.89
15.3472	35.08
15.3611	34.71
15.375	34.64
15.3889	34.4
15.4028	35.39
15.4167	35.46
15.4306	35.46
15.4445	35.39
15.4583	35.71
15.4722	35.89
15.4861	35.46
15.5	35.39
15.5139	34.89
15.5278	35.14
15.5417	35.96
15.5556	35.83
15.5695	35.58
15.5833	35.33
15.5972	34.96
15.6111	35.46
15.625	35.71
15.6389	35.83
15.6528	35.52
15.6667	35.83
15.6806	35.64
15.6945	35.33
15.7083	35.71
15.7222	35.52
15.7361	35.33
15.75	35.39
15.7639	35.02
15.7778	36.7
15.7917	36.2
15.8056	36.33
15.8195	35.64
15.8333	35.39
15.8472	36.14
15.8611	35.46
15.875	35.46
15.8889	35.14
15.9028	34.77
15.9167	35.52
15.9306	36.77
15.9445	37.02
15.9583	37.02
15.9722	36.39
15.9861	36.77
16	35.83
16.0139	36.14
16.0278	35.14
16.0417	34.64
16.0556	34.4
16.0695	33.83
16.0833	34.77
16.0972	35.83
16.1111	35.77
16.125	34.4
16.1389	32.65
16.1528	31.09
16.1667	29.65
16.1806	28.03
16.1945	26.28
16.2083	25.03
16.2222	23.4
16.2361	22.09
16.25	20.9
16.2639	19.65
16.2778	18.65
16.2917	17.77
16.3056	16.83
16.3195	16.08
16.3333	15.39
16.3472	14.71
16.3611	14.2
16.375	13.64
16.3889	13.01
16.4028	12.45
16.4167	11.89
16.4306	11.39
16.4445	10.76
16.4583	10.19
16.4722	9.69
16.4861	9.63
16.5	10.01
16.5139	10.88
16.5278	12.33
16.5417	17.21
16.5556	26.22
16.5695	33.58
16.5833	34.64
16.5972	34.33
16.6111	35.46
16.625	34.89
16.6389	34.46
16.6528	34.46
16.6667	34.4
16.6806	35.52
16.6945	34.77
16.7083	34.83
16.7222	34.89
16.7361	34.71
16.75	34.96
16.7639	35.58
16.7778	35.52
16.7917	35.02
16.8056	34.71
16.8195	34.52
16.8333	35.52
16.8472	35.21
16.8611	35.02
16.875	34.96
16.8889	34.64
16.9028	35.52
16.9167	35.27
16.9306	35.02
16.9445	34.83
16.9583	35.27
16.9722	35.39
16.9861	35.33
17	35.46
17.0139	36.7
17.0278	37.08
17.0417	36.27
17.0556	35.39
17.0695	35.39
17.0833	35.96
17.0972	36.14
17.1111	34.33
17.125	33.02
17.1389	31.46
17.1528	29.96
17.1667	28.53
17.1806	27.09
17.1945	25.65
17.2083	24.03
17.2222	22.59
17.2361	21.34
17.25	20.21
17.2639	19.15
17.2778	18.15
17.2917	17.27
17.3056	16.4
17.3195	15.58
17.3333	14.89
17.3472	14.2
17.3611	13.64
17.375	13.14
17.3889	12.58
17.4028	11.95
17.4167	11.45
17.4306	10.95
17.4445	10.51
17.4583	10.01
17.4722	9.57
17.4861	9.25
17.5	8.88
17.5139	8.5
17.5278	8.13
17.5417	7.88
17.5556	7.62
17.5695	7.31
17.5833	7.12
17.5972	7
17.6111	6.87
17.625	6.68
17.6389	6.62
17.6528	6.62
17.6667	6.56
17.6806	6.5
17.6945	6.5
17.7083	6.5
17.7222	6.37
17.7361	6.31
17.75	6.25
17.7639	6.25
17.7778	6.25
17.7917	6.18
17.8056	6.25
17.8195	6.31
17.8333	6.31
17.8472	6.37
17.8611	6.43
17.875	6.5
17.8889	6.5
17.9028	6.5
17.9167	6.62
17.9306	6.68
17.9445	6.75
17.9583	6.87
17.9722	6.94
17.9861	7
18	7.06
18.0139	7.12
18.0278	7.25
18.0417	7.25
18.0556	7.25
18.0695	7.31
18.0833	7.37
18.0972	7.44
18.1111	7.5
18.125	7.56
18.1389	7.62
18.1528	7.69
18.1667	7.69
18.1806	7.75
18.1945	7.81
18.2083	7.75
18.2222	7.75
18.2361	7.75
18.25	7.75
18.2639	7.81
18.2778	7.81
18.2917	7.81
18.3056	7.88
18.3195	7.81
18.3333	7.88
18.3472	7.81
18.3611	7.69
18.375	7.62
18.3889	7.44
18.4028	7.25
18.4167	7.12
18.4306	7.06
18.4445	7
18.4583	6.87
18.4722	6.75
18.4861	6.68
18.5	6.62
18.5139	6.56
18.5278	6.37
18.5417	6.31
18.5556	6.18
18.5695	6.12
18.5833	6.12
18.5972	6.06
18.6111	5.99
18.625	5.87
18.6389	5.81
18.6528	5.87
18.6667	5.93
18.6806	5.99
18.6945	6.06
18.7083	6.12
18.7222	6.12
18.7361	6.18
18.75	6.31
18.7639	6.37
18.7778	6.5
18.7917	6.56
18.8056	6.68
18.8195	6.81
18.8333	6.87
18.8472	7
18.8611	7.12
18.875	7.19
18.8889	7.25
18.9028	7.31
18.9167	7.37
18.9306	7.5
18.9445	7.56
18.9583	7.62
18.9722	7.69
18.9861	7.69
19	7.75
19.0139	7.81
19.0278	7.81
19.0417	7.81
19.0556	7.81
19.0695	7.88
19.0833	7.88
19.0972	7.94
19.1111	7.94
19.125	8
19.1389	8
19.1528	8.06
19.1667	8.06
19.1806	8.13
19.1945	8.13
19.2083	8.06
19.2222	8.06
19.2361	8.13
19.25	8.13
19.2639	8.13
19.2778	8.19
19.2917	8.19
19.3056	8.19
19.3195	8.19
19.3333	8.13
19.3472	8.13
19.3611	8.13
19.375	8.06
19.3889	7.88
19.4028	7.81
19.4167	7.69
19.4306	7.44
19.4445	7.31
19.4583	7.25
19.4722	7.06
19.4861	6.94
19.5	6.81
19.5139	6.68
19.5278	6.56
19.5417	6.43
19.5556	6.31
19.5695	6.12
19.5833	5.93
19.5972	5.81
19.6111	5.81
19.625	5.74
19.6389	5.68
19.6528	5.87
19.6667	6.18
19.6806	6.56
19.6945	7.12
19.7083	7.81
19.7222	8.88
19.7361	10.45
19.75	13.14
19.7639	19.59
19.7778	29.53
19.7917	34.71
19.8056	36.08
19.8195	36.39
19.8333	36.02
19.8472	36.39
19.8611	35.83
19.875	36.08
19.8889	36.27
19.9028	35.96
19.9167	35.71
19.9306	35.64
19.9445	36.64
19.9583	36.2
19.9722	36.45
19.9861	35.89
20	35.46
20.0139	35.71
20.0278	35.77
20.0417	36.27
20.0556	36.2
20.0695	35.58
20.0833	35.71
20.0972	35.71
20.1111	36.02
20.125	36.77
20.1389	35.71
20.1528	35.58
20.1667	35.02
20.1806	35.77
20.1945	36.83
20.2083	36.77
20.2222	36.52
20.2361	36.14
20.25	36.02
20.2639	35.96
20.2778	35.77
20.2917	35.52
20.3056	35.46
20.3195	35.39
20.3333	35.46
20.3472	35.71
20.3611	36.45
20.375	35.96
20.3889	36.33
20.4028	35.77
20.4167	35.33
20.4306	35.21
20.4445	34.77
20.4583	35.89
20.4722	35.96
20.4861	36.2
20.5	36.08
20.5139	35.71
20.5278	35.08
20.5417	34.89
20.5556	35.14
20.5695	35.14
20.5833	37.08
20.5972	36.33
20.6111	35.77
20.625	35.08
20.6389	34.77
20.6528	34.96
20.6667	34.83
20.6806	35.83
20.6945	35.89
20.7083	34.58
20.7222	33.15
20.7361	31.77
20.75	30.46
20.7639	29.21
20.7778	27.71
20.7917	26.4
20.8056	25.09
20.8195	23.72
20.8333	22.46
20.8472	21.34
20.8611	20.28
20.875	19.27
20.8889	18.4
20.9028	17.65
20.9167	16.9
20.9306	16.15
20.9445	15.58
20.9583	15.02
20.9722	14.52
20.9861	14.02
21	13.64
21.0139	13.2
21.0278	12.89
21.0417	12.51
21.0556	12.2
21.0695	11.95
21.0833	11.7
21.0972	11.45
21.1111	11.26
21.125	11.13
21.1389	10.95
21.1528	10.76
21.1667	10.63
21.1806	10.57
21.1945	10.38
21.2083	10.26
21.2222	10.13
21.2361	10.07
21.25	9.94
21.2639	9.88
21.2778	9.82
21.2917	9.76
21.3056	9.69
21.3195	9.63
21.3333	9.63
21.3472	9.57
21.3611	9.51
21.375	9.44
21.3889	9.38
21.4028	9.38
21.4167	9.25
21.4306	9.19
21.4445	9.19
21.4583	9.07
21.4722	9
21.4861	8.94
21.5	8.82
21.5139	8.82
21.5278	8.69
21.5417	8.57
21.5556	8.57
21.5695	8.5
21.5833	8.44
21.5972	8.44
21.6111	8.31
21.625	8.25
21.6389	8.19
21.6528	8.13
21.6667	8.13
21.6806	8.06
21.6945	7.94
21.7083	7.88
21.7222	7.88
21.7361	7.88
21.75	7.94
21.7639	7.94
21.7778	7.94
21.7917	7.94
21.8056	8
21.8195	8.06
21.8333	8
21.8472	8.06
21.8611	8.06
21.875	8.06
21.8889	8.13
21.9028	8.19
21.9167	8.19
21.9306	8.25
21.9445	8.25
21.9583	8.25
21.9722	8.31
21.9861	8.38
22	8.38
22.0139	8.38
22.0278	8.44
22.0417	8.44
22.0556	8.44
22.0695	8.5
22.0833	8.5
22.0972	8.5
22.1111	8.57
22.125	8.57
22.1389	8.57
22.1528	8.57
22.1667	8.63
22.1806	8.63
22.1945	8.63
22.2083	8.63
22.2222	8.63
22.2361	8.63
22.25	8.63
22.2639	8.63
22.2778	8.69
22.2917	8.63
22.3056	8.69
22.3195	8.69
22.3333	8.63
22.3472	8.63
22.3611	8.63
22.375	8.57
22.3889	8.57
22.4028	8.5
22.4167	8.5
22.4306	8.5
22.4445	8.44
22.4583	8.44
22.4722	8.38
22.4861	8.31
22.5	8.31
22.5139	8.31
22.5278	8.19
22.5417	8.19
22.5556	8.19
22.5695	8.13
22.5833	8.06
22.5972	8
22.6111	7.94
22.625	7.94
22.6389	7.81
22.6528	7.62
22.6667	7.56
22.6806	7.44
22.6945	7.31
22.7083	7.12
22.7222	6.87
22.7361	6.62
22.75	6.43
22.7639	6.31
22.7778	6.12
22.7917	5.87
22.8056	5.68
22.8195	5.56
22.8333	5.43
22.8472	5.37
22.8611	5.3
22.875	5.24
22.8889	5.24
22.9028	5.37
22.9167	5.56
22.9306	5.81
22.9445	6.18
22.9583	6.68
22.9722	7.44
22.9861	8.5
23	9.94
23.0139	12.26
23.0278	16.33
23.0417	25.59
23.0556	33.46
23.0695	35.39
23.0833	35.58
23.0972	35.71
23.1111	35.77
23.125	35.71
23.1389	35.96
23.1528	36.02
23.1667	35.96
23.1806	35.64
23.1945	35.64
23.2083	35.96
23.2222	36.27
23.2361	36.27
23.25	36.45
23.2639	36.2
23.2778	35.77
23.2917	36.02
23.3056	35.71
23.3195	35.46
23.3333	36.14
23.3472	36.83
23.3611	36.2
23.375	35.58
23.3889	35.39
23.4028	35.27
23.4167	36.2
23.4306	35.83
23.4445	37.02
23.4583	37.08
23.4722	36.14
23.4861	36.14
23.5	37.02
23.5139	36.58
23.5278	36.39
23.5417	35.89
23.5556	36.08
23.5695	36.39
23.5833	35.77
23.5972	36.58
23.6111	36.39
23.625	36.45
23.6389	36.14
23.6528	36.64
23.6667	36.7
23.6806	36.08
23.6945	35.83
23.7083	35.96
23.7222	36.02
23.7361	35.71
23.75	36.27
23.7639	36.58
23.7778	36.33
23.7917	36.45
23.8056	36.27
23.8195	35.58
23.8333	35.21
23.8472	35.08
23.8611	36.45
23.875	36.14
23.8889	36.08
23.9028	36.45
23.9167	37.08
23.9306	36.95
23.9445	36.64
23.9583	35.64
23.9722	35.02
23.9861	34.77
24	34.4
24.0139	35.46
24.0278	35.14
24.0417	34.64
24.0556	34.52
24.0695	35.46
24.0833	35.96
24.0972	35.52
24.1111	35.46
24.125	35.27
24.1389	35.02
24.1528	35.77
24.1667	35.77
24.1806	36.39
24.1945	36.02
24.2083	35.71
24.2222	35.58
24.2361	35.58
24.25	35.27
24.2639	35.08
24.2778	35.77
24.2917	35.83
24.3056	35.21
24.3195	35.21
24.3333	35.83
24.3472	36.58
24.3611	36.58
24.375	36.14
24.3889	35.64
24.4028	35.14
24.4167	35.64
24.4306	35.02
24.4445	34.96
24.4583	34.77
24.4722	34.77
24.4861	35.46
24.5	35.52
24.5139	35.83
24.5278	36.08
24.5417	35.64
24.5556	36.27
24.5695	35.64
24.5833	35.39
24.5972	35.27
24.6111	35.52
24.625	36.14
24.6389	35.77
24.6528	35.77
24.6667	36.33
24.6806	36.02
24.6945	34.46
24.7083	32.96
24.7222	31.52
24.7361	29.96
24.75	28.34
24.7639	26.84
24.7778	25.53
24.7917	24.09
24.8056	22.71
24.8195	21.46
24.8333	20.28
24.8472	19.15
24.8611	18.09
24.875	17.21
24.8889	16.4
24.9028	15.64
24.9167	15.02
24.9306	14.39
24.9445	13.89
24.9583	13.39
24.9722	12.95
24.9861	12.58
25	12.26
25.0139	11.89
25.0278	11.57
25.0417	11.32
25.0556	11.07
25.0695	10.82
25.0833	10.63
25.0972	10.45
25.1111	10.32
25.125	10.19
25.1389	10.07
25.1528	9.94
25.1667	9.88
25.1806	9.76
25.1945	9.63
25.2083	9.57
25.2222	9.44
25.2361	9.38
25.25	9.38
25.2639	9.32
25.2778	9.25
25.2917	9.25
25.3056	9.19
25.3195	9.13
25.3333	9.07
25.3472	9
25.3611	8.88
25.375	8.82
25.3889	8.75
25.4028	8.63
25.4167	8.57
25.4306	8.44
25.4445	8.31
25.4583	8.25
25.4722	8.13
25.4861	8
25.5	7.94
25.5139	7.81
25.5278	7.62
25.5417	7.56
25.5556	7.5
25.5695	7.37
25.5833	7.25
25.5972	7.19
25.6111	7.06
25.625	7
25.6389	6.94
25.6528	6.94
25.6667	6.87
25.6806	6.81
25.6945	6.75
25.7083	6.68
25.7222	6.75
25.7361	6.75
25.75	6.81
25.7639	6.87
25.7778	6.94
25.7917	7
25.8056	7.06
25.8195	7.19
25.8333	7.25
25.8472	7.25
25.8611	7.25
25.875	7.31
25.8889	7.37
25.9028	7.44
25.9167	7.56
25.9306	7.62
25.9445	7.69
25.9583	7.75
25.9722	7.81
25.9861	7.94
26	8
26.0139	8
26.0278	8.06
26.0417	8.13
26.0556	8.19
26.0695	8.19
26.0833	8.25
26.0972	8.31
26.1111	8.38
26.125	8.38
26.1389	8.44
26.1528	8.44
26.1667	8.5
26.1806	8.5
26.1945	8.5
26.2083	8.57
26.2222	8.57
26.2361	8.57
26.25	8.57
26.2639	8.63
26.2778	8.63
26.2917	8.63
26.3056	8.63
26.3195	8.63
26.3333	8.57
26.3472	8.5
26.3611	8.44
26.375	8.38
26.3889	8.31
26.4028	8.25
26.4167	8.13
26.4306	8
26.4445	7.94
26.4583	7.75
26.4722	7.62
26.4861	7.56
26.5	7.5
26.5139	7.31
26.5278	7.25
26.5417	7.19
26.5556	7.19
26.5695	7.12
26.5833	7.06
26.5972	7.06
26.6111	7
26.625	7
26.6389	7
26.6528	7
26.6667	7
26.6806	7
26.6945	7
26.7083	7
26.7222	7
26.7361	7.06
26.75	7.19
26.7639	7.25
26.7778	7.31
26.7917	7.37
26.8056	7.5
26.8195	7.56
26.8333	7.56
26.8472	7.62
26.8611	7.62
26.875	7.69
26.8889	7.75
26.9028	7.81
26.9167	7.81
26.9306	7.94
26.9445	7.94
26.9583	8
26.9722	8.06
26.9861	8.06
27	8.13
27.0139	8.13
27.0278	8.19
27.0417	8.19
27.0556	8.25
27.0695	8.25
27.0833	8.31
27.0972	8.31
27.1111	8.38
27.125	8.38
27.1389	8.44
27.1528	8.44
27.1667	8.5
27.1806	8.5
27.1945	8.57
27.2083	9
27.2222	10.26
27.2361	12.26
27.25	18.52
27.2639	29.46
27.2778	34.64
27.2917	35.77
27.3056	36.02
27.3195	35.96
27.3333	36.27
27.3472	36.08
27.3611	36.02
27.375	35.89
27.3889	36.08
27.4028	36.64
27.4167	36.83
27.4306	36.2
27.4445	36.7
27.4583	36.52
27.4722	36.45
27.4861	36.2
27.5	36.39
27.5139	35.39
27.5278	35.46
27.5417	35.02
27.5556	35.71
27.5695	36.27
27.5833	35.77
27.5972	35.71
27.6111	35.89
27.625	35.83
27.6389	36.52
27.6528	36.39
27.6667	35.58
27.6806	35.52
27.6945	35.96
27.7083	35.52
27.7222	35.02
27.7361	35.39
27.75	36.33
27.7639	35.52
27.7778	35.46
27.7917	35.14
27.8056	35.14
27.8195	34.96
27.8333	35.52
27.8472	36.2
27.8611	34.77
27.875	33.33
27.8889	31.77
27.9028	30.21
27.9167	28.59
27.9306	26.78
27.9445	25.28
27.9583	24.09
27.9722	22.71
27.9861	21.4
28	20.28
28.0139	19.21
28.0278	18.27
28.0417	17.46
28.0556	16.65
28.0695	15.96
28.0833	15.27
28.0972	14.64
28.1111	14.14
28.125	13.64
28.1389	13.2
28.1528	12.83
28.1667	12.39
28.1806	12.01
28.1945	11.7
28.2083	11.39
28.2222	11.13
28.2361	10.88
28.25	10.63
28.2639	10.45
28.2778	10.32
28.2917	10.13
28.3056	9.94
28.3195	9.82
28.3333	9.63
28.3472	9.44
28.3611	9.25
28.375	9.07
28.3889	8.88
28.4028	8.69
28.4167	8.5
28.4306	8.25
28.4445	8
28.4583	7.75
28.4722	7.56
28.4861	7.31
28.5	7.06
28.5139	6.87
28.5278	6.62
28.5417	6.43
28.5556	6.25
28.5695	6.12
28.5833	5.99
28.5972	5.81
28.6111	5.68
28.625	5.68
28.6389	5.62
28.6528	5.49
28.6667	5.43
28.6806	5.3
28.6945	5.24
28.7083	5.3
28.7222	5.3
[truncated: 6,128 more rows]

## Sheet: 8C_AN4
0.9583	36.15
0.9722	37.15
0.9861	36.84
1	36.34
1.0139	35.84
1.0278	35.96
1.0417	35.96
1.0556	35.9
1.0695	36.28
1.0833	36.15
1.0972	36.09
1.1111	36.09
1.125	36.21
1.1389	36.65
1.1528	37.4
1.1667	36.9
1.1806	36.77
1.1945	36.34
1.2083	36.03
1.2222	35.9
1.2361	35.9
1.25	35.71
1.2639	36.15
1.2778	35.84
1.2917	35.84
1.3056	35.96
1.3195	35.65
1.3333	35.53
1.3472	35.28
1.3611	35.47
1.375	35.03
1.3889	34.97
1.4028	34.97
1.4167	34.9
1.4306	35.34
1.4445	34.97
1.4583	35.15
1.4722	35.22
1.4861	35.47
1.5	35.4
1.5139	35.4
1.5278	35.15
1.5417	35.03
1.5556	35.71
1.5695	35.71
1.5833	35.59
1.5972	35.78
1.6111	36.28
1.625	35.84
1.6389	35.78
1.6528	35.71
1.6667	35.96
1.6806	36.03
1.6945	36.09
1.7083	35.4
1.7222	35.78
1.7361	36.03
1.75	35.96
1.7639	36.4
1.7778	37.59
1.7917	37.27
1.8056	36.4
1.8195	35.9
1.8333	35.9
1.8472	36.59
1.8611	37.52
1.875	36.9
1.8889	36.84
1.9028	36.4
1.9167	36.09
1.9306	36.15
1.9445	35.65
1.9583	36.34
1.9722	36.4
1.9861	36.03
2	37.09
2.0139	36.84
2.0278	36.9
2.0417	36.09
2.0556	35.78
2.0695	36.53
2.0833	36.15
2.0972	35.78
2.1111	35.28
2.125	36.03
2.1389	35.71
2.1528	35.59
2.1667	35.96
2.1806	36.9
2.1945	37.21
2.2083	37.09
2.2222	36.9
2.2361	35.9
2.25	35.4
2.2639	35.15
2.2778	36.28
2.2917	35.78
2.3056	35.59
2.3195	35.22
2.3333	35.22
2.3472	34.97
2.3611	35.03
2.375	35.09
2.3889	35.09
2.4028	35.34
2.4167	35.28
2.4306	35.65
2.4445	35.78
2.4583	35.59
2.4722	35.53
2.4861	35.71
2.5	36.03
2.5139	35.78
2.5278	35.65
2.5417	35.53
2.5556	35.28
2.5695	36.15
2.5833	36.15
2.5972	35.84
2.6111	35.4
2.625	35.28
2.6389	35.53
2.6528	35.65
2.6667	35.9
2.6806	35.4
2.6945	35.47
2.7083	35.9
2.7222	35.78
2.7361	35.53
2.75	36.21
2.7639	36.03
2.7778	36.53
2.7917	37.34
2.8056	36.77
2.8195	36.09
2.8333	35.9
2.8472	36.53
2.8611	36.84
2.875	36.46
2.8889	35.9
2.9028	35.9
2.9167	36.53
2.9306	36.09
2.9445	35.78
2.9583	36.09
2.9722	36.21
2.9861	37.52
3	37.27
3.0139	37.09
3.0278	37.15
3.0417	36.46
3.0556	35.9
3.0695	36.15
3.0833	36.03
3.0972	35.84
3.1111	35.53
3.125	35.71
3.1389	35.71
3.1528	35.84
3.1667	36.84
3.1806	36.9
3.1945	36.59
3.2083	36.46
3.2222	36.84
3.2361	37.34
3.25	36.96
3.2639	36.77
3.2778	35.78
3.2917	35.9
3.3056	35.28
3.3195	35.09
3.3333	35.15
3.3472	35.15
3.3611	34.9
3.375	35.09
3.3889	35.65
3.4028	35.22
3.4167	35.09
3.4306	35.09
3.4445	35.15
3.4583	35.22
3.4722	35.9
3.4861	35.9
3.5	35.71
3.5139	35.78
3.5278	35.71
3.5417	36.4
3.5556	36.15
3.5695	35.96
3.5833	35.9
3.5972	35.78
3.6111	35.4
3.625	35.78
3.6389	35.47
3.6528	35.34
3.6667	35.71
3.6806	36.09
3.6945	35.71
3.7083	36.21
3.7222	35.78
3.7361	36.21
3.75	36.21
3.7639	36.34
3.7778	37.52
3.7917	37.27
3.8056	37.34
3.8195	36.84
3.8333	36.53
3.8472	36.03
3.8611	35.65
3.875	36.4
3.8889	36.53
3.9028	35.96
3.9167	36.59
3.9306	36.09
3.9445	36.34
3.9583	36.34
3.9722	36.28
3.9861	35.78
4	35.84
4.0139	36.4
4.0278	37.52
4.0417	37.77
4.0556	37.46
4.0695	37.96
4.0833	36.59
4.0972	35.84
4.1111	35.71
4.125	36.34
4.1389	36.03
4.1528	36.09
4.1667	36.34
4.1806	36.46
4.1945	36.46
4.2083	36.15
4.2222	35.9
4.2361	36.46
4.25	37.02
4.2639	37.09
4.2778	36.34
4.2917	36.15
4.3056	35.96
4.3195	35.15
4.3333	35.09
4.3472	35.15
4.3611	35.09
4.375	35.53
4.3889	35.28
4.4028	34.9
4.4167	34.84
4.4306	35.34
4.4445	35.28
4.4583	35.96
4.4722	35.9
4.4861	36.34
4.5	36.15
4.5139	36.09
4.5278	35.59
4.5417	35.53
4.5556	36.15
4.5695	35.65
4.5833	35.28
4.5972	36.03
4.6111	35.59
4.625	35.4
4.6389	35.47
4.6528	35.9
4.6667	36.53
4.6806	35.78
4.6945	35.47
4.7083	35.47
4.7222	35.59
4.7361	36.28
4.75	36.03
4.7639	35.96
4.7778	36.09
4.7917	36.59
4.8056	36.46
4.8195	38.21
4.8333	37.9
4.8472	36.96
4.8611	36.77
4.875	36.4
4.8889	36.4
4.9028	35.84
4.9167	36.28
4.9306	36.53
4.9445	36.15
4.9583	37.21
4.9722	37.46
4.9861	37.27
5	36.77
5.0139	36.09
5.0278	35.53
5.0417	35.65
5.0556	36.46
5.0695	37.21
5.0833	37.02
5.0972	36.9
5.1111	36.4
5.125	36.03
5.1389	35.96
5.1528	35.84
5.1667	35.59
5.1806	36.28
5.1945	36.65
5.2083	36.09
5.2222	35.9
5.2361	36.21
5.25	35.9
5.2639	35.9
5.2778	36.09
5.2917	35.84
5.3056	36.21
5.3195	36.53
5.3333	36.34
5.3472	35.53
5.3611	35.34
5.375	35.53
5.3889	35.84
5.4028	35.71
5.4167	35.09
5.4306	35.28
5.4445	35.28
5.4583	34.9
5.4722	36.09
5.4861	35.65
5.5	35.4
5.5139	35.47
5.5278	35.71
5.5417	35.53
5.5556	35.4
5.5695	35.15
5.5833	35.53
5.5972	35.84
5.6111	35.84
5.625	36.15
5.6389	35.59
5.6528	35.4
5.6667	36.09
5.6806	35.96
5.6945	35.71
5.7083	35.59
5.7222	35.28
5.7361	35.71
5.75	36.03
5.7639	36.96
5.7778	37.34
5.7917	36.84
5.8056	36.4
5.8195	36.03
5.8333	35.84
5.8472	36.28
5.8611	36.9
5.875	37.52
5.8889	37.02
5.9028	36.21
5.9167	35.96
5.9306	35.96
5.9445	36.65
5.9583	36.65
5.9722	35.84
5.9861	35.53
6	35.53
6.0139	36.03
6.0278	36.96
6.0417	36.65
6.0556	36.34
6.0695	36.46
6.0833	36.53
6.0972	37.15
6.1111	37.21
6.125	37.4
6.1389	36.71
6.1528	36.34
6.1667	35.78
6.1806	35.96
6.1945	36.53
6.2083	36.53
6.2222	36.34
6.2361	35.96
6.25	36.03
6.2639	36.09
6.2778	36.4
6.2917	35.78
6.3056	35.03
6.3195	34.84
6.3333	35.65
6.3472	35.9
6.3611	35.71
6.375	35.53
6.3889	35.53
6.4028	35.15
6.4167	36.15
6.4306	36.28
6.4445	35.53
6.4583	35.47
6.4722	35.59
6.4861	35.15
6.5	35.4
6.5139	35.53
6.5278	35.65
6.5417	35.15
6.5556	35.4
6.5695	35.47
6.5833	35.53
6.5972	35.84
6.6111	35.59
6.625	35.53
6.6389	35.53
6.6528	35.53
6.6667	36.15
6.6806	35.34
6.6945	35.65
6.7083	36.34
6.7222	36.15
6.7361	35.65
6.75	35.47
6.7639	35.47
6.7778	35.4
6.7917	36.15
6.8056	36.65
6.8195	36.96
6.8333	36.96
6.8472	36.46
6.8611	36.09
6.875	35.9
6.8889	35.84
6.9028	36.46
6.9167	36.4
6.9306	37.46
6.9445	37.52
6.9583	37.27
6.9722	37.65
6.9861	37.96
7	37.09
7.0139	35.9
7.0278	35.65
7.0417	35.59
7.0556	35.47
7.0695	35.65
7.0833	36.77
7.0972	36.03
7.1111	35.65
7.125	35.53
7.1389	36.15
7.1528	35.47
7.1667	36.77
7.1806	37.27
7.1945	38.15
7.2083	37.15
7.2222	36.46
7.2361	36.46
7.25	35.65
7.2639	35.47
7.2778	36.15
7.2917	36.28
7.3056	35.96
7.3195	35.59
7.3333	35.28
7.3472	35.71
7.3611	35.84
7.375	35.09
7.3889	35.28
7.4028	35.22
7.4167	35.65
7.4306	35.34
7.4445	34.72
7.4583	35.34
7.4722	34.72
7.4861	35.53
7.5	36.21
7.5139	35.59
7.5278	35.28
7.5417	35.15
7.5556	35.03
7.5695	34.59
7.5833	34.97
7.5972	35.22
7.6111	35.78
7.625	35.22
7.6389	35.03
7.6528	34.65
7.6667	34.41
7.6806	35.96
7.6945	35.9
7.7083	35.9
7.7222	35.65
7.7361	35.53
7.75	35.47
7.7639	35.28
7.7778	36.34
7.7917	35.78
7.8056	35.53
7.8195	35.65
7.8333	35.22
7.8472	36.21
7.8611	36.71
7.875	36.03
7.8889	36.28
7.9028	36.59
7.9167	36.9
7.9306	37.52
7.9445	37.9
7.9583	37.09
7.9722	37.77
7.9861	36.96
8	36.03
8.0139	35.4
8.0278	36.09
8.0417	35.9
8.0556	35.59
8.0695	35.96
8.0833	36.15
8.0972	37.15
8.1111	36.9
8.125	36.4
8.1389	36.53
8.1528	37.71
8.1667	37.83
8.1806	37.09
8.1945	36.15
8.2083	35.71
8.2222	35.65
8.2361	35.47
8.25	36.09
8.2639	35.53
8.2778	35.15
8.2917	35.28
8.3056	36.46
8.3195	36.53
8.3333	36.09
8.3472	35.65
8.3611	35.71
8.375	35.47
8.3889	36.15
8.4028	35.9
8.4167	35.59
8.4306	35.28
8.4445	35.28
8.4583	35.03
8.4722	35.71
8.4861	35.53
8.5	35.53
8.5139	35.34
8.5278	35.28
8.5417	36.03
8.5556	35.9
8.5695	35.4
8.5833	35.4
8.5972	35.47
8.6111	35.96
8.625	36.09
8.6389	36.03
8.6528	35.53
8.6667	35.78
8.6806	35.9
8.6945	35.78
8.7083	35.65
8.7222	35.65
8.7361	35.71
8.75	35.47
8.7639	36.15
8.7778	36.84
8.7917	36.46
8.8056	36.34
8.8195	35.9
8.8333	36.03
8.8472	35.9
8.8611	35.96
8.875	36.59
8.8889	36.53
8.9028	37.15
8.9167	37.59
8.9306	37.4
8.9445	36.59
8.9583	36.15
8.9722	35.71
8.9861	35.9
9	35.84
9.0139	36.09
9.0278	35.84
9.0417	35.96
9.0556	35.9
9.0695	36.34
9.0833	36.46
9.0972	36.59
9.1111	37.15
9.125	37.02
9.1389	36.84
9.1528	36.77
9.1667	36.4
9.1806	36.15
9.1945	35.78
9.2083	36.09
9.2222	35.84
9.2361	36.53
9.25	36.15
9.2639	35.71
9.2778	36.09
9.2917	35.78
9.3056	36.28
9.3195	36.28
9.3333	35.96
9.3472	36.15
9.3611	35.78
9.375	36.03
9.3889	36.28
9.4028	36.15
9.4167	35.15
9.4306	35.9
9.4445	36.03
9.4583	35.96
9.4722	35.28
9.4861	36.46
9.5	35.65
9.5139	36.09
9.5278	36.21
9.5417	36.59
9.5556	36.09
9.5695	35.65
9.5833	35.84
9.5972	36.4
9.6111	36.59
9.625	35.96
9.6389	35.34
9.6528	35.71
9.6667	35.4
9.6806	36.34
9.6945	36.21
9.7083	35.78
9.7222	35.96
9.7361	36.4
9.75	37.02
9.7639	36.46
9.7778	36.53
9.7917	36.15
9.8056	36.28
9.8195	36.28
9.8333	35.84
9.8472	35.84
9.8611	36.4
9.875	36.59
9.8889	37.96
9.9028	37.46
9.9167	37.59
9.9306	37.21
9.9445	36.28
9.9583	35.78
9.9722	36.21
9.9861	36.21
10	35.84
10.0139	36.28
10.0278	36.15
10.0417	36.09
10.0556	36.21
10.0695	36.84
10.0833	37.4
10.0972	37.21
10.1111	37.21
10.125	36.4
10.1389	36.28
10.1528	36.77
10.1667	36.34
10.1806	36.46
10.1945	36.59
10.2083	36.53
10.2222	36.4
10.2361	37.09
10.25	36.9
10.2639	36.34
10.2778	35.53
10.2917	36.21
10.3056	36.59
10.3195	36.09
10.3333	35.9
10.3472	35.47
10.3611	35.4
10.375	35.71
10.3889	35.47
10.4028	35.84
10.4167	35.4
10.4306	34.9
10.4445	35.28
10.4583	36.34
10.4722	36.15
10.4861	35.9
10.5	35.78
10.5139	35.65
10.5278	35.47
10.5417	35.22
10.5556	35.78
10.5695	36.21
10.5833	35.71
10.5972	35.65
10.6111	34.9
10.625	35.71
10.6389	35.28
10.6528	35.84
10.6667	35.9
10.6806	35.96
10.6945	35.9
10.7083	35.4
10.7222	35.34
10.7361	36.09
10.75	36.46
10.7639	36.09
10.7778	35.65
10.7917	36.28
10.8056	37.46
10.8195	37.21
10.8333	36.77
10.8472	36.09
10.8611	36.71
10.875	36.9
10.8889	37.27
10.9028	37.02
10.9167	37.09
10.9306	36.77
10.9445	36.15
10.9583	36.09
10.9722	36.28
10.9861	36.46
11	37.21
11.0139	36.9
11.0278	35.84
11.0417	35.47
11.0556	35.28
11.0695	35.34
11.0833	36.4
11.0972	36.15
11.1111	36.09
11.125	36.03
11.1389	35.96
11.1528	35.53
11.1667	36.77
11.1806	36.4
11.1945	36.59
11.2083	37.46
11.2222	37.27
11.2361	37.46
11.25	36.53
11.2639	35.78
11.2778	35.22
11.2917	35.4
11.3056	35.71
11.3195	35.34
11.3333	35.47
11.3472	35.84
11.3611	36.28
11.375	35.84
11.3889	35.78
11.4028	35.9
11.4167	35.71
11.4306	35.59
11.4445	37.21
11.4583	37.96
11.4722	37.15
11.4861	37.15
11.5	36.9
11.5139	35.59
11.5278	35.65
11.5417	36.15
11.5556	35.71
11.5695	35.15
11.5833	34.47
11.5972	35.34
11.6111	35.34
11.625	34.59
11.6389	36.59
11.6528	36.71
11.6667	36.09
11.6806	35.53
11.6945	35.47
11.7083	35.71
11.7222	35.9
11.7361	36.84
11.75	37.4
11.7639	36.71
11.7778	36.03
11.7917	35.71
11.8056	35.4
11.8195	36.34
11.8333	37.46
11.8472	37.4
11.8611	37.52
11.875	36.9
11.8889	36.9
11.9028	36.96
11.9167	36.4
11.9306	35.9
11.9445	36.09
11.9583	35.65
11.9722	34.84
11.9861	36.53
12	36.46
12.0139	36.09
12.0278	36.84
12.0417	36.21
12.0556	36.09
12.0695	35.9
12.0833	35.96
12.0972	37.27
12.1111	36.59
12.125	36.09
12.1389	35.96
12.1528	36.77
12.1667	37.27
12.1806	37.4
12.1945	37.4
12.2083	37.09
12.2222	36.53
12.2361	36.71
12.25	36.34
12.2639	36.21
12.2778	36.21
12.2917	35.84
12.3056	35.78
12.3195	35.71
12.3333	36.03
12.3472	36.28
12.3611	36.59
12.375	36.28
12.3889	36.28
12.4028	37.09
12.4167	36.46
12.4306	37.4
12.4445	36.71
12.4583	36.65
12.4722	36.84
12.4861	36.53
12.5	36.4
12.5139	36.28
12.5278	36.84
12.5417	36.34
12.5556	35.96
12.5695	36.21
12.5833	36.15
12.5972	36.21
12.6111	35.96
12.625	35.59
12.6389	36.96
12.6528	36.9
12.6667	36.34
12.6806	36.4
12.6945	36.15
12.7083	36.34
12.7222	36.21
12.7361	36.4
12.75	36.03
12.7639	35.96
12.7778	36.9
12.7917	37.96
12.8056	37.59
12.8195	36.96
12.8333	36.53
12.8472	36.21
12.8611	38.08
12.875	36.77
12.8889	36.84
12.9028	36.46
12.9167	35.96
12.9306	36.15
12.9445	37.15
12.9583	36.84
12.9722	36.53
12.9861	36.15
13	36.28
13.0139	36.84
13.0278	37.15
13.0417	36.59
13.0556	36.4
13.0695	36.59
13.0833	36.96
13.0972	36.84
13.1111	36.53
13.125	37.09
13.1389	37.15
13.1528	37.46
13.1667	37.27
13.1806	36.84
13.1945	36.4
13.2083	36.15
13.2222	36.46
13.2361	36.9
13.25	36.53
13.2639	36.15
13.2778	36.09
13.2917	36.15
13.3056	36.53
13.3195	36.15
13.3333	36.15
13.3472	36.4
13.3611	36.65
13.375	35.78
13.3889	35.78
13.4028	35.15
13.4167	36.59
13.4306	36.59
13.4445	35.9
13.4583	36.09
13.4722	36.21
13.4861	36.03
13.5	36.21
13.5139	36.21
13.5278	35.78
13.5417	35.84
13.5556	35.71
13.5695	36.03
13.5833	36.59
13.5972	35.84
13.6111	35.71
13.625	36.28
13.6389	36.77
13.6528	36.09
13.6667	35.71
13.6806	36.53
13.6945	36.71
13.7083	36.34
13.7222	36.28
13.7361	36.4
13.75	36.9
13.7639	36.59
13.7778	37.83
13.7917	37.34
13.8056	36.46
13.8195	36.03
13.8333	36.03
13.8472	36.96
13.8611	36.59
13.875	36.59
13.8889	37.27
13.9028	36.9
13.9167	38.08
13.9306	37.9
13.9445	37.65
13.9583	37.65
13.9722	37.59
13.9861	37.02
14	36.53
14.0139	36.28
14.0278	36.46
14.0417	36.84
14.0556	35.9
14.0695	35.65
14.0833	36.03
14.0972	37.27
14.1111	37.21
14.125	36.9
14.1389	36.53
14.1528	36.03
14.1667	35.84
14.1806	35.71
14.1945	35.15
14.2083	35.47
14.2222	37.4
14.2361	37.65
14.25	37.52
14.2639	36.96
14.2778	36.15
14.2917	35.84
14.3056	35.84
14.3195	35.84
14.3333	35.53
14.3472	35.28
14.3611	35.78
14.375	35.71
14.3889	36.15
14.4028	36.03
14.4167	36.15
14.4306	35.34
14.4445	35.28
14.4583	36.53
14.4722	36.4
14.4861	36.34
14.5	35.28
14.5139	36.28
14.5278	36.4
14.5417	36.4
14.5556	36.21
14.5695	35.96
14.5833	35.84
14.5972	36.46
14.6111	36.28
14.625	36.15
14.6389	36.09
14.6528	36.03
14.6667	36.65
14.6806	36.09
14.6945	35.78
14.7083	36.28
14.7222	36.28
14.7361	36.21
14.75	36.59
14.7639	36.21
14.7778	37.27
14.7917	37.83
14.8056	37.65
14.8195	37.4
14.8333	36.4
14.8472	36.15
14.8611	36.15
14.875	36.15
14.8889	37.34
14.9028	37.4
14.9167	37.71
14.9306	36.71
14.9445	36.4
14.9583	35.65
14.9722	35.78
14.9861	35.22
15	35.47
15.0139	35.78
15.0278	36.96
15.0417	36.59
15.0556	36.21
15.0695	35.59
15.0833	36.71
15.0972	37.59
15.1111	37.71
15.125	36.9
15.1389	36.34
15.1528	36.09
15.1667	35.65
15.1806	35.84
15.1945	37.09
15.2083	36.71
15.2222	35.96
15.2361	36.09
15.25	36.65
15.2639	35.59
15.2778	35.4
15.2917	35.65
15.3056	35.71
15.3195	37.21
15.3333	36.77
15.3472	35.9
15.3611	36.03
15.375	35.34
15.3889	35.53
15.4028	35.09
15.4167	35.09
15.4306	35.9
15.4445	35.47
15.4583	34.97
15.4722	35.9
15.4861	35.84
15.5	35.15
15.5139	35.22
15.5278	36.28
15.5417	35.71
15.5556	35.78
15.5695	35.96
15.5833	35.47
15.5972	35.53
15.6111	36.15
15.625	36.4
15.6389	35.78
15.6528	35.47
15.6667	35.34
15.6806	35.28
15.6945	35.65
15.7083	35.65
15.7222	36.53
15.7361	36.84
15.75	36.71
15.7639	36.09
15.7778	35.84
15.7917	36.15
15.8056	36.09
15.8195	37.02
15.8333	37.77
15.8472	37.52
15.8611	37.59
15.875	37.46
15.8889	37.4
15.9028	37.27
15.9167	36.21
15.9306	35.9
15.9445	35.59
15.9583	35.53
15.9722	35.59
15.9861	35.9
16	36.28
16.0139	35.84
16.0278	35.28
16.0417	35.96
16.0556	36.65
16.0695	36.21
16.0833	36.15
16.0972	36.28
16.1111	36.84
16.125	36.65
16.1389	36.9
16.1528	37.83
16.1667	37.46
16.1806	36.65
16.1945	35.78
16.2083	35.09
16.2222	35.34
16.2361	36.03
16.25	36.4
16.2639	35.96
16.2778	35.65
16.2917	35.96
16.3056	36.15
16.3195	35.78
16.3333	35.96
16.3472	35.34
16.3611	35.15
16.375	35.03
16.3889	35.59
16.4028	35.9
16.4167	36.09
16.4306	35.4
16.4445	35.53
16.4583	35.53
16.4722	35.9
16.4861	35.78
16.5	35.4
16.5139	36.09
16.5278	36.03
16.5417	35.71
16.5556	35.84
16.5695	35.65
16.5833	35.22
16.5972	36.15
16.6111	35.96
16.625	35.78
16.6389	35.47
16.6528	35.15
16.6667	35.09
16.6806	36.15
16.6945	36.09
16.7083	35.84
16.7222	35.28
16.7361	36.09
16.75	36.65
16.7639	36.21
16.7778	36.71
16.7917	37.4
16.8056	37.4
16.8195	37.96
16.8333	37.46
16.8472	36.84
16.8611	36.46
16.875	35.96
16.8889	36.46
16.9028	37.09
16.9167	36.59
16.9306	36.34
16.9445	36.9
16.9583	36.28
16.9722	35.84
16.9861	35.84
17	36.21
17.0139	36.21
17.0278	36.28
17.0417	36.03
17.0556	36.28
17.0695	36.34
17.0833	36.34
17.0972	36.77
17.1111	36.15
17.125	35.4
17.1389	36.03
17.1528	37.77
17.1667	37.71
17.1806	37.21
17.1945	36.9
17.2083	36.28
17.2222	35.78
17.2361	35.65
17.25	36.15
17.2639	36.65
17.2778	36.59
17.2917	36.71
17.3056	36.4
17.3195	36.09
17.3333	35.71
17.3472	35.59
17.3611	35.71
17.375	35.53
17.3889	35.59
17.4028	35.53
17.4167	36.21
17.4306	35.65
17.4445	35.84
17.4583	35.34
17.4722	35.28
17.4861	35.9
17.5	35.4
17.5139	35.59
17.5278	36.28
17.5417	35.65
17.5556	35.9
17.5695	36.21
17.5833	35.78
17.5972	35.78
17.6111	36.09
17.625	35.47
17.6389	35.84
17.6528	36.4
17.6667	35.71
17.6806	36.28
17.6945	37.4
17.7083	37.4
17.7222	36.77
17.7361	36.09
17.75	35.71
17.7639	35.65
17.7778	35.34
17.7917	36.28
17.8056	37.65
17.8195	37.4
17.8333	37.21
17.8472	36.4
17.8611	36.09
17.875	35.78
17.8889	36.46
17.9028	37.27
17.9167	36.28
17.9306	35.71
17.9445	35.47
17.9583	35.96
17.9722	36.28
17.9861	36.28
18	35.9
18.0139	35.65
18.0278	35.47
18.0417	35.4
18.0556	35.96
18.0695	36.65
18.0833	36.15
18.0972	36.21
18.1111	35.4
18.125	36.09
18.1389	35.96
18.1528	36.03
18.1667	36.59
18.1806	36.84
18.1945	36.9
18.2083	38.02
18.2222	37.52
18.2361	37.27
18.25	35.96
18.2639	35.65
18.2778	35.22
18.2917	36.59
18.3056	36.53
18.3195	35.9
18.3333	35.71
18.3472	35.15
18.3611	35.78
18.375	35.71
18.3889	35.47
18.4028	34.97
18.4167	35.47
18.4306	34.9
18.4445	36.28
18.4583	36.21
18.4722	35.59
18.4861	35.47
18.5	35.34
18.5139	35.4
18.5278	35.09
18.5417	35.53
18.5556	36.03
18.5695	35.78
18.5833	34.97
18.5972	35.71
18.6111	35.34
18.625	35.9
18.6389	36.03
18.6528	35.59
18.6667	35.9
18.6806	35.84
18.6945	35.65
18.7083	35.59
18.7222	35.4
18.7361	36.03
18.75	35.9
18.7639	36.34
18.7778	37.09
18.7917	38.08
18.8056	38.02
18.8195	37.34
18.8333	36.65
18.8472	36.21
18.8611	35.34
18.875	36.03
18.8889	36.84
18.9028	37.21
18.9167	36.59
18.9306	36.9
18.9445	36.34
18.9583	35.78
18.9722	35.4
18.9861	35.84
19	35.15
19.0139	35.09
19.0278	36.09
19.0417	36.53
19.0556	36.77
19.0695	37.27
19.0833	36.96
19.0972	36.28
19.1111	36.84
19.125	37.21
19.1389	36.84
19.1528	36.21
19.1667	35.9
19.1806	35.9
19.1945	36.4
19.2083	36.03
19.2222	35.84
19.2361	35.84
19.25	35.78
19.2639	36.09
19.2778	36.65
19.2917	36.34
19.3056	36.15
19.3195	35.84
19.3333	35.96
19.3472	35.71
19.3611	36.03
19.375	35.59
19.3889	36.4
19.4028	36.21
19.4167	35.71
19.4306	35.59
19.4445	35.47
19.4583	35.9
19.4722	35.65
19.4861	35.53
19.5	35.03
19.5139	35.84
19.5278	36.15
19.5417	35.78
19.5556	36.03
19.5695	35.78
19.5833	35.96
19.5972	35.59
19.6111	35.4
19.625	35.59
19.6389	35.71
19.6528	35.47
19.6667	35.53
19.6806	35.78
19.6945	36.15
19.7083	35.78
19.7222	35.71
19.7361	36.53
19.75	36.09
19.7639	36.4
19.7778	36.46
19.7917	37.52
19.8056	37.59
19.8195	36.71
19.8333	36.34
19.8472	35.84
19.8611	35.71
19.875	35.28
19.8889	36.46
19.9028	36.71
19.9167	36.09
19.9306	35.71
19.9445	35.53
19.9583	36.53
19.9722	37.27
19.9861	37.34
20	36.9
20.0139	36.65
20.0278	36.15
20.0417	35.84
20.0556	35.53
20.0695	35.59
20.0833	35.4
20.0972	36.46
20.1111	36.03
20.125	35.96
20.1389	36.03
20.1528	36.65
20.1667	36.21
20.1806	36.34
20.1945	36.96
20.2083	37.52
20.2222	37.15
20.2361	36.46
20.25	35.78
20.2639	35.09
20.2778	36.15
20.2917	36.59
20.3056	36.34
20.3195	35.71
20.3333	35.22
20.3472	35.96
20.3611	35.34
20.375	35.28
20.3889	35.84
20.4028	35.84
20.4167	35.65
20.4306	35.71
20.4445	35.28
20.4583	35.9
20.4722	35.84
20.4861	36.65
20.5	35.96
20.5139	35.78
20.5278	36.03
20.5417	35.78
20.5556	35.4
20.5695	36.9
20.5833	36.03
20.5972	36.28
20.6111	35.71
20.625	35.65
20.6389	35.84
20.6528	36.28
20.6667	36.09
20.6806	35.9
20.6945	36.65
20.7083	36.28
20.7222	35.96
20.7361	36.15
20.75	35.65
20.7639	36.71
20.7778	36.28
20.7917	35.96
20.8056	36.28
20.8195	36.59
20.8333	37.77
20.8472	37.71
20.8611	36.84
20.875	37.09
20.8889	36.28
20.9028	36.84
20.9167	36.53
20.9306	36.4
20.9445	36.21
20.9583	36.03
20.9722	36.65
20.9861	37.02
21	37.71
21.0139	37.21
21.0278	36.71
21.0417	36.15
21.0556	36.09
21.0695	36.96
21.0833	36.9
21.0972	36.77
21.1111	36.03
21.125	35.9
21.1389	36.03
21.1528	36.03
21.1667	35.65
21.1806	36.15
21.1945	37.02
21.2083	36.77
21.2222	36.59
21.2361	36.65
21.25	37.21
21.2639	37.02
21.2778	37.27
21.2917	36.53
21.3056	35.9
21.3195	36.34
21.3333	36.46
21.3472	36.09
21.3611	35.84
21.375	36.4
21.3889	36.21
21.4028	35.84
21.4167	36.15
21.4306	36.21
21.4445	36.4
21.4583	36.28
21.4722	35.96
21.4861	35.84
21.5	36.09
21.5139	36.03
21.5278	35.71
21.5417	35.71
21.5556	35.71
21.5695	35.28
21.5833	35.59
21.5972	36.28
21.6111	36.03
21.625	35.84
21.6389	36.53
21.6528	36.21
21.6667	36.28
21.6806	37.34
21.6945	36.84
21.7083	36.28
21.7222	36.03
21.7361	36.21
21.75	36.03
21.7639	35.84
21.7778	36.53
21.7917	36.84
21.8056	36.21
21.8195	35.71
21.8333	35.34
21.8472	36.21
21.8611	37.02
21.875	36.96
21.8889	37.46
21.9028	37.09
21.9167	37.02
21.9306	36.77
21.9445	36.09
21.9583	35.96
21.9722	35.78
21.9861	36.46
22	35.71
22.0139	35.71
22.0278	36.34
22.0417	36.09
22.0556	35.9
22.0695	35.78
22.0833	35.4
22.0972	36.77
22.1111	36.46
22.125	35.84
22.1389	35.59
22.1528	35.71
22.1667	35.65
22.1806	36.84
22.1945	36.53
22.2083	36.09
22.2222	36.03
22.2361	36.9
22.25	36.9
22.2639	36.15
22.2778	35.78
22.2917	35.71
22.3056	36.15
22.3195	35.4
22.3333	35.53
22.3472	35.28
22.3611	35.28
22.375	35.96
22.3889	36.03
22.4028	35.53
22.4167	35.59
22.4306	35.65
22.4445	35.65
22.4583	35.59
22.4722	35.65
22.4861	35.09
22.5	36.09
22.5139	36.21
22.5278	35.84
22.5417	35.78
22.5556	35.84
22.5695	35.9
22.5833	36.34
22.5972	36.4
22.6111	35.65
22.625	35.9
22.6389	35.28
22.6528	35.53
22.6667	36.15
22.6806	35.59
22.6945	34.9
22.7083	35.9
22.7222	36.09
22.7361	36.9
22.75	36.21
22.7639	35.84
22.7778	34.78
22.7917	35.47
22.8056	35.34
22.8195	34.78
22.8333	36.03
22.8472	36.03
22.8611	36.9
22.875	36.4
22.8889	37.46
22.9028	37.9
22.9167	37.27
22.9306	36.4
22.9445	35.4
22.9583	34.84
22.9722	34.78
22.9861	35.47
23	35.22
23.0139	36.15
23.0278	36.77
23.0417	36.34
23.0556	36.4
23.0695	36.71
23.0833	36.59
23.0972	36.03
23.1111	35.71
23.125	35.15
23.1389	35.84
23.1528	36.4
23.1667	36.4
23.1806	35.34
23.1945	35.09
23.2083	35.78
23.2222	36.03
23.2361	35.65
23.25	35.34
23.2639	35.09
23.2778	35.15
23.2917	35.59
23.3056	35.96
23.3195	35.78
23.3333	35.34
23.3472	35.15
23.3611	36.15
23.375	35.47
23.3889	35.15
23.4028	34.72
23.4167	35.15
23.4306	35.03
23.4445	35.71
23.4583	35.96
23.4722	35.9
23.4861	35.22
23.5	36.46
23.5139	35.78
23.5278	36.21
23.5417	35.9
23.5556	36.21
23.5695	35.4
23.5833	35.59
23.5972	34.65
23.6111	36.34
23.625	36.96
23.6389	36.71
23.6528	36.03
23.6667	35.28
23.6806	35.71
23.6945	36.4
23.7083	36.34
23.7222	36.15
23.7361	35.47
23.75	35.15
23.7639	35.03
23.7778	35.09
23.7917	35.22
23.8056	35.9
23.8195	36.65
23.8333	37.21
23.8472	37.09
23.8611	37.21
23.875	36.77
23.8889	36.15
23.9028	35.78
23.9167	35.9
23.9306	35.78
23.9445	36.34
23.9583	36.09
23.9722	36.03
23.9861	35.78
24	35.71
24.0139	36.15
24.0278	35.78
24.0417	36.03
24.0556	35.59
24.0695	36.28
24.0833	36.09
24.0972	36.53
24.1111	36.28
24.125	36.15
24.1389	37.15
24.1528	36.96
24.1667	36.84
24.1806	36.09
24.1945	35.53
24.2083	35.71
24.2222	36.4
24.2361	35.34
24.25	35.15
24.2639	35.22
24.2778	36.28
24.2917	35.53
24.3056	35.15
24.3195	34.53
24.3333	35.28
24.3472	34.9
24.3611	35.53
24.375	35.59
24.3889	35.53
24.4028	35.65
24.4167	35.15
24.4306	35.15
24.4445	34.53
24.4583	35.34
24.4722	35.15
24.4861	35.15
24.5	36.09
24.5139	35.53
24.5278	35.28
24.5417	35.9
24.5556	35.71
24.5695	35.71
24.5833	35.65
24.5972	35.96
24.6111	35.71
24.625	35.84
24.6389	35.47
24.6528	36.21
24.6667	36.21
24.6806	36.21
24.6945	35.96
24.7083	35.96
24.7222	36.09
24.7361	36.65
24.75	36.03
24.7639	36.4
24.7778	36.53
24.7917	36.71
24.8056	36.09
24.8195	35.9
24.8333	36.34
24.8472	36.03
24.8611	35.84
24.875	36.34
24.8889	37.15
24.9028	37.52
24.9167	37.46
24.9306	37.46
24.9445	36.9
24.9583	36.53
24.9722	36.09
24.9861	36.15
25	36.34
25.0139	36.09
25.0278	36.46
25.0417	35.9
25.0556	35.71
25.0695	35.15
25.0833	35.47
25.0972	35.47
25.1111	36.71
25.125	37.34
25.1389	36.77
25.1528	36.09
25.1667	35.47
25.1806	35.96
25.1945	35.47
25.2083	35.53
25.2222	35.84
25.2361	35.84
25.25	35.59
25.2639	35.53
25.2778	36.09
25.2917	35.53
25.3056	35.71
25.3195	35.71
25.3333	36.46
25.3472	35.84
25.3611	36.21
25.375	36.09
25.3889	35.59
25.4028	35.15
25.4167	35.28
25.4306	34.78
25.4445	35.53
25.4583	35.22
25.4722	36.03
25.4861	35.4
25.5	35.96
25.5139	35.53
25.5278	35.34
25.5417	36.53
25.5556	36.03
25.5695	35.22
25.5833	35.28
25.5972	34.59
25.6111	35.22
25.625	35.03
25.6389	34.9
25.6528	36.59
25.6667	36.34
25.6806	35.53
25.6945	35.78
25.7083	35.84
25.7222	36.03
25.7361	35.78
25.75	35.78
25.7639	36.03
25.7778	37.09
25.7917	38.15
25.8056	38.21
25.8195	36.77
25.8333	36.34
25.8472	35.71
25.8611	35.71
25.875	35.59
25.8889	36.21
25.9028	36.84
25.9167	37.4
25.9306	37.27
25.9445	37.77
25.9583	37.65
25.9722	37.34
25.9861	37.02
26	36.71
26.0139	36.53
26.0278	36.71
26.0417	36.9
26.0556	35.9
26.0695	35.03
26.0833	34.84
26.0972	35.09
26.1111	34.9
26.125	34.78
26.1389	36.28
26.1528	36.15
26.1667	35.65
26.1806	35.78
26.1945	35.9
26.2083	37.34
26.2222	37.15
26.2361	36.46
26.25	35.84
26.2639	35.71
26.2778	36.53
26.2917	36.59
26.3056	36.21
26.3195	36.03
26.3333	35.96
26.3472	35.65
26.3611	36.4
26.375	36.53
26.3889	36.71
26.4028	36.34
26.4167	36.4
26.4306	36.28
26.4445	36.03
26.4583	35.71
26.4722	35.96
26.4861	35.22
26.5	35.96
26.5139	35.4
26.5278	35.71
26.5417	35.28
26.5556	35.47
26.5695	36.21
26.5833	36.59
26.5972	35.78
26.6111	35.96
26.625	36.21
26.6389	35.71
26.6528	35.53
26.6667	35.71
26.6806	36.34
26.6945	36.65
26.7083	36.21
26.7222	35.84
26.7361	35.96
26.75	36.03
26.7639	37.02
26.7778	37.21
26.7917	36.96
26.8056	36.4
26.8195	36.15
26.8333	36.71
26.8472	36.84
26.8611	37.15
26.875	37.02
26.8889	37.21
26.9028	37.59
26.9167	36.71
26.9306	36.4
26.9445	35.78
26.9583	35.84
26.9722	35.34
26.9861	36.09
27	35.84
27.0139	35.53
27.0278	36.21
27.0417	35.96
27.0556	35.9
27.0695	36.53
27.0833	36.65
27.0972	38.08
27.1111	37.02
27.125	36.84
27.1389	36.03
27.1528	35.4
27.1667	35.09
27.1806	35.22
27.1945	35.78
27.2083	36.21
27.2222	35.9
27.2361	35.59
27.25	35.4
27.2639	35.9
27.2778	36.53
27.2917	35.78
27.3056	35.4
27.3195	35.71
27.3333	35.47
27.3472	35.65
27.3611	35.47
27.375	34.84
27.3889	34.84
27.4028	35.59
27.4167	35.15
27.4306	36.03
27.4445	35.78
27.4583	35.84
27.4722	35.59
27.4861	35.9
27.5	36.28
27.5139	36.03
27.5278	35.71
27.5417	36.21
27.5556	36.46
27.5695	36.21
27.5833	35.53
27.5972	35.09
27.6111	34.97
27.625	34.9
27.6389	36.34
27.6528	35.96
27.6667	35.71
27.6806	35.47
27.6945	36.03
27.7083	36.34
27.7222	36.21
27.7361	36.15
27.75	36.46
27.7639	36.46
27.7778	35.96
27.7917	36.03
27.8056	35.96
27.8195	35.96
27.8333	35.65
27.8472	35.47
27.8611	35.9
27.875	36.46
27.8889	37.65
27.9028	37.02
27.9167	37.02
27.9306	36.65
27.9445	36.21
27.9583	36.15
27.9722	35.9
27.9861	35.65
28	35.4
28.0139	35.9
28.0278	37.09
28.0417	36.65
28.0556	36.21
28.0695	36.09
28.0833	36.4
28.0972	35.71
28.1111	36.15
28.125	35.53
28.1389	35.71
28.1528	35.65
28.1667	36.4
28.1806	36.71
28.1945	36.46
28.2083	36.53
28.2222	36.77
28.2361	36.59
28.25	36.28
28.2639	35.59
28.2778	35.22
28.2917	35.4
28.3056	35.65
28.3195	35.22
28.3333	35.34
28.3472	35.78
28.3611	35.4
28.375	35.9
28.3889	35.71
28.4028	36.03
28.4167	35.59
28.4306	35.71
28.4445	35.84
28.4583	36.09
28.4722	35.71
28.4861	34.9
28.5	34.97
28.5139	36.03
28.5278	35.59
28.5417	35.4
28.5556	35.47
28.5695	35.65
28.5833	36.28
28.5972	36.21
28.6111	35.71
28.625	35.59
28.6389	35.65
28.6528	35.78
28.6667	36.4
28.6806	35.78
28.6945	35.47
28.7083	35.4
28.7222	36.09
[truncated: 6,128 more rows]

## Sheet: 8C_AN5
0.9583	36.02
0.9722	36.21
0.9861	35.9
1	35.84
1.0139	35.4
1.0278	35.34
1.0417	35.59
1.0556	35.52
1.0695	34.9
1.0833	34.9
1.0972	35.77
1.1111	36.34
1.125	36.9
1.1389	36.34
1.1528	36.21
1.1667	35.71
1.1806	35.03
1.1945	34.4
1.2083	35.34
1.2222	35.4
1.2361	35.21
1.25	35.34
1.2639	35.03
1.2778	36.34
1.2917	35.4
1.3056	34.96
1.3195	34.71
1.3333	34.53
1.3472	34.53
1.3611	35.4
1.375	35.52
1.3889	34.96
1.4028	35.21
1.4167	34.84
1.4306	34.65
1.4445	34.46
1.4583	34.09
1.4722	35.21
1.4861	35.4
1.5	34.96
1.5139	34.96
1.5278	35.46
1.5417	35.34
1.5556	35.28
1.5695	34.96
1.5833	35.65
1.5972	35.59
1.6111	35.15
1.625	34.84
1.6389	35.28
1.6528	35.15
1.6667	35.65
1.6806	35.59
1.6945	35.77
1.7083	35.84
1.7222	35.59
1.7361	35.84
1.75	36.21
1.7639	36.02
1.7778	34.59
1.7917	36.58
1.8056	36.15
1.8195	36.27
1.8333	36.52
1.8472	34.53
1.8611	36.77
1.875	37.08
1.8889	36.02
1.9028	36.34
1.9167	36.09
1.9306	36.09
1.9445	35.46
1.9583	34.84
1.9722	34.9
1.9861	34.65
2	35.21
2.0139	35.09
2.0278	35.09
2.0417	35.84
2.0556	35.84
2.0695	36.02
2.0833	37.02
2.0972	36.46
2.1111	34.84
2.125	36.34
2.1389	36.34
2.1528	35.71
2.1667	35.21
2.1806	34.78
2.1945	35.03
2.2083	34.9
2.2222	34.84
2.2361	34.78
2.25	35.84
2.2639	35.46
2.2778	34.78
2.2917	34.53
2.3056	34.15
2.3195	34.78
2.3333	34.4
2.3472	34.09
2.3611	33.84
2.375	33.78
2.3889	34.15
2.4028	34.15
2.4167	34.28
2.4306	35.46
2.4445	35.28
2.4583	35.03
2.4722	35.03
2.4861	34.71
2.5	35.46
2.5139	35.21
2.5278	35.03
2.5417	35.34
2.5556	35.28
2.5695	35.4
2.5833	35.21
2.5972	35.15
2.6111	35.09
2.625	35.21
2.6389	35.34
2.6528	35.9
2.6667	35.4
2.6806	35.28
2.6945	35.71
2.7083	35.84
2.7222	36.4
2.7361	35.84
2.75	36.21
2.7639	36.9
2.7778	37.27
2.7917	36.58
2.8056	34.4
2.8195	35.96
2.8333	35.71
2.8472	35.65
2.8611	35.59
2.875	35.77
2.8889	35.52
2.9028	35.34
2.9167	35.03
2.9306	35.28
2.9445	35.9
2.9583	36.83
2.9722	36.96
2.9861	37.52
3	36.46
3.0139	37.52
3.0278	35.09
3.0417	36.65
3.0556	35.77
3.0695	35.96
3.0833	35.65
3.0972	35.28
3.1111	34.96
3.125	34.96
3.1389	35.71
3.1528	35.28
3.1667	35.15
3.1806	34.96
3.1945	34.78
3.2083	35.46
3.2222	35.96
3.2361	36.21
3.25	36.71
3.2639	36.96
3.2778	35.4
3.2917	35.96
3.3056	35.46
3.3195	35.03
3.3333	34.4
3.3472	34.65
3.3611	34.4
3.375	33.97
3.3889	33.9
3.4028	33.84
3.4167	34.65
3.4306	34.28
3.4445	34.21
3.4583	34.28
3.4722	34.28
3.4861	33.34
3.5	34.78
3.5139	34.59
3.5278	34.84
3.5417	34.71
3.5556	34.65
3.5695	34.71
3.5833	35.71
3.5972	34.84
3.6111	35.71
3.625	35.46
3.6389	35.34
3.6528	35.84
3.6667	35.46
3.6806	35.21
3.6945	35.4
3.7083	35.9
3.7222	35.84
3.7361	35.28
3.75	36.15
3.7639	35.96
3.7778	35.65
3.7917	36.83
3.8056	36.34
3.8195	36.15
3.8333	35.84
3.8472	35.4
3.8611	35.28
3.875	35.09
3.8889	35.59
3.9028	35.96
3.9167	35.46
3.9306	35.71
3.9445	35.09
3.9583	34.84
3.9722	34.9
3.9861	35.34
4	35.21
4.0139	35.09
4.0278	34.59
4.0417	36.77
4.0556	36.9
4.0695	35.46
4.0833	36.27
4.0972	36.21
4.1111	35.84
4.125	35.34
4.1389	35.21
4.1528	35.59
4.1667	35.09
4.1806	34.65
4.1945	36.21
4.2083	34.78
4.2222	35.03
4.2361	34.84
4.25	34.34
4.2639	34.96
4.2778	34.53
4.2917	35.84
4.3056	35.28
4.3195	34.9
4.3333	34.46
4.3472	34.09
4.3611	34.34
4.375	34.34
4.3889	33.9
4.4028	33.65
4.4167	35.03
4.4306	35.09
4.4445	34.21
4.4583	33.59
4.4722	33.72
4.4861	35.28
4.5	35.09
4.5139	34.84
4.5278	34.9
4.5417	34.96
4.5556	35.09
4.5695	34.78
4.5833	34.78
4.5972	34.28
4.6111	34.15
4.625	35.28
4.6389	35.09
4.6528	33.72
4.6667	33.65
4.6806	33.59
4.6945	33.84
4.7083	34.09
4.7222	34.28
4.7361	35.21
4.75	35.4
4.7639	35.84
4.7778	36.46
4.7917	36.34
4.8056	35.59
4.8195	36.52
4.8333	36.9
4.8472	37.52
4.8611	37.27
4.875	36.46
4.8889	35.59
4.9028	36.4
4.9167	35.52
4.9306	35.46
4.9445	34.9
4.9583	35.77
4.9722	35.9
4.9861	36.4
5	35.59
5.0139	35.46
5.0278	35.65
5.0417	35.84
5.0556	35.4
5.0695	35.84
5.0833	37.02
5.0972	36.52
5.1111	35.46
5.125	36.02
5.1389	36.27
5.1528	35.65
5.1667	35.4
5.1806	35.34
5.1945	34.96
5.2083	35.03
5.2222	35.15
5.2361	35.4
5.25	34.9
5.2639	34.28
5.2778	35.15
5.2917	35.65
5.3056	35.15
5.3195	34.78
5.3333	35.03
5.3472	34.65
5.3611	34.84
5.375	35.4
5.3889	35.15
5.4028	34.4
5.4167	35.28
5.4306	34.9
5.4445	34.46
5.4583	34.4
5.4722	34.59
5.4861	35.4
5.5	35.34
5.5139	34.28
5.5278	35.65
5.5417	35.4
5.5556	35.15
5.5695	35.03
5.5833	34.78
5.5972	33.9
5.6111	35.84
5.625	35.4
5.6389	35.28
5.6528	35.34
5.6667	35.4
5.6806	35.59
5.6945	35.9
5.7083	35.71
5.7222	35.65
5.7361	35.71
5.75	36.21
5.7639	36.34
5.7778	36.4
5.7917	36.09
5.8056	35.84
5.8195	35.9
5.8333	36.46
5.8472	35.84
5.8611	36.52
5.875	37.15
5.8889	37.27
5.9028	36.77
5.9167	36.27
5.9306	35.96
5.9445	37.02
5.9583	35.96
5.9722	35.34
5.9861	35.34
6	35.84
6.0139	35.71
6.0278	36.58
6.0417	36.96
6.0556	37.4
6.0695	36.96
6.0833	37.08
6.0972	37.27
6.1111	36.58
6.125	36.58
6.1389	35.96
6.1528	35.15
6.1667	35.09
6.1806	34.78
6.1945	34.84
6.2083	34.78
6.2222	35.52
6.2361	35.09
6.25	34.96
6.2639	35.21
6.2778	34.96
6.2917	36.46
6.3056	35.65
6.3195	34.78
6.3333	34.84
6.3472	34.34
6.3611	33.72
6.375	33.65
6.3889	34.96
6.4028	34.59
6.4167	34.09
6.4306	34.34
6.4445	34.21
6.4583	33.9
6.4722	34.09
6.4861	35.4
6.5	34.65
6.5139	34.71
6.5278	34.71
6.5417	34.21
6.5556	35.28
6.5695	35.09
6.5833	35.03
6.5972	35.34
6.6111	35.21
6.625	35.09
6.6389	35.34
6.6528	35.52
6.6667	35.28
6.6806	34.9
6.6945	35.09
6.7083	35.52
6.7222	35.34
6.7361	35.4
6.75	35.9
6.7639	35.9
6.7778	36.4
6.7917	37.21
6.8056	36.27
6.8195	36.34
6.8333	35.71
6.8472	35.46
6.8611	36.15
6.875	36.71
6.8889	37.08
6.9028	36.65
6.9167	35.77
6.9306	36.83
6.9445	36.15
6.9583	34.53
6.9722	35.09
6.9861	36.71
7	35.96
7.0139	35.77
7.0278	35.09
7.0417	34.28
7.0556	34.59
7.0695	34.53
7.0833	35.34
7.0972	35.84
7.1111	35.65
7.125	35.96
7.1389	36.83
7.1528	35.84
7.1667	35.52
7.1806	34.9
7.1945	34.71
7.2083	35.46
7.2222	35.4
7.2361	35.59
7.25	35.28
7.2639	35.21
7.2778	34.9
7.2917	34.9
7.3056	34.84
7.3195	34.96
7.3333	35.03
7.3472	35.65
7.3611	35.15
7.375	34.53
7.3889	34.4
7.4028	34.71
7.4167	34.65
7.4306	34.46
7.4445	34.53
7.4583	35.59
7.4722	35.09
7.4861	35.03
7.5	34.9
7.5139	34.65
7.5278	33.97
7.5417	34.4
7.5556	35.59
7.5695	35.34
7.5833	35.09
7.5972	34.71
7.6111	34.96
7.625	35.28
7.6389	35.21
7.6528	34.84
7.6667	35.09
7.6806	35.46
7.6945	36.02
7.7083	35.9
7.7222	36.09
7.7361	35.52
7.75	35.21
7.7639	36.02
7.7778	35.65
7.7917	35.59
7.8056	35.09
7.8195	34.65
7.8333	35.77
7.8472	35.9
7.8611	35.03
7.875	36.02
7.8889	36.02
7.9028	35.09
7.9167	34.96
7.9306	34.71
7.9445	34.53
7.9583	35.28
7.9722	34.96
7.9861	35.71
8	35.52
8.0139	36.15
8.0278	35.34
8.0417	35.34
8.0556	35.84
8.0695	35.65
8.0833	35.52
8.0972	35.34
8.1111	34.53
8.125	33.47
8.1389	33.28
8.1528	32.97
8.1667	32.59
8.1806	31.84
8.1945	31.28
8.2083	29.85
8.2222	28.6
8.2361	27.41
8.25	28.47
8.2639	28.78
8.2778	28.35
8.2917	27.91
8.3056	27.47
8.3195	26.97
8.3333	26.66
8.3472	25.97
8.3611	25.6
8.375	25.16
8.3889	24.1
8.4028	23.1
8.4167	21.91
8.4306	20.72
8.4445	19.59
8.4583	18.66
8.4722	17.72
8.4861	16.9
8.5	16.21
8.5139	15.53
8.5278	14.96
8.5417	14.4
8.5556	14.02
8.5695	15.78
8.5833	22.28
8.5972	30.35
8.6111	33.28
8.625	34.59
8.6389	34.71
8.6528	34.9
8.6667	34.96
8.6806	34.84
8.6945	35.84
8.7083	35.52
8.7222	35.4
8.7361	34.46
8.75	35.15
8.7639	34.78
8.7778	34.53
8.7917	34.71
8.8056	34.65
8.8195	34.84
8.8333	35.34
8.8472	35.77
8.8611	35.46
8.875	35.28
8.8889	35.84
8.9028	35.65
8.9167	35.09
8.9306	34.34
8.9445	36.65
8.9583	35.96
8.9722	35.59
8.9861	35.9
9	35.52
9.0139	35.28
9.0278	35.21
9.0417	35.09
9.0556	35.84
9.0695	35.96
9.0833	36.34
9.0972	36.15
9.1111	36.21
9.125	36.09
9.1389	36.52
9.1528	36.58
9.1667	35.84
9.1806	34.9
9.1945	35.15
9.2083	36.52
9.2222	35.9
9.2361	35.65
9.25	36.21
9.2639	35.71
9.2778	35.65
9.2917	35.96
9.3056	35.59
9.3195	35.03
9.3333	34.9
9.3472	35.03
9.3611	35.71
9.375	35.34
9.3889	34.78
9.4028	34.65
9.4167	34.65
9.4306	34.4
9.4445	34.03
9.4583	34.84
9.4722	34.28
9.4861	34.28
9.5	34.46
9.5139	34.84
9.5278	34.96
9.5417	34.84
9.5556	34.9
9.5695	35.34
9.5833	34.96
9.5972	35.46
9.6111	35.4
9.625	35.46
9.6389	35.15
9.6528	34.65
9.6667	34.53
9.6806	35.03
9.6945	35.4
9.7083	34.96
9.7222	34.78
9.7361	35.28
9.75	35.28
9.7639	34.78
9.7778	34.71
9.7917	35.52
9.8056	35.15
9.8195	35.52
9.8333	35.28
9.8472	35.03
9.8611	34.59
9.875	35.84
9.8889	35.4
9.9028	35.34
9.9167	36.02
9.9306	35.96
9.9445	36.4
9.9583	37.58
9.9722	36.9
9.9861	35.9
10	35.59
10.0139	36.4
10.0278	35.9
10.0417	35.15
10.0556	35.46
10.0695	35.09
10.0833	35.21
10.0972	34.84
10.1111	34.9
10.125	35.28
10.1389	35.03
10.1528	35.09
10.1667	36.58
10.1806	36.4
10.1945	35.84
10.2083	36.15
10.2222	35.9
10.2361	35.71
10.25	36.09
10.2639	36.34
10.2778	36.34
10.2917	36.27
10.3056	36.9
10.3195	36.71
10.3333	37.15
10.3472	36.9
10.3611	36.65
10.375	36.83
10.3889	36.77
10.4028	36.27
10.4167	36.09
10.4306	36.02
10.4445	36.96
10.4583	36.9
10.4722	36.65
10.4861	36.15
10.5	36.34
10.5139	36.27
10.5278	36.21
10.5417	36.58
10.5556	35.9
10.5695	35.59
10.5833	35.71
10.5972	36.02
10.6111	36.65
10.625	36.52
10.6389	36.34
10.6528	36.15
10.6667	36.83
10.6806	36.21
10.6945	36.09
10.7083	36.15
10.7222	36.15
10.7361	36.15
10.75	35.28
10.7639	36.65
10.7778	36.21
10.7917	36.46
10.8056	36.77
10.8195	36.27
10.8333	36.02
10.8472	36.65
10.8611	36.09
10.875	36.34
10.8889	35.84
10.9028	35.84
10.9167	35.96
10.9306	36.09
10.9445	35.65
10.9583	35.77
10.9722	36.21
10.9861	36.21
11	35.59
11.0139	36.15
11.0278	36.52
11.0417	37.71
11.0556	38.02
11.0695	37.15
11.0833	36.52
11.0972	36.71
11.1111	35.96
11.125	36.34
11.1389	35.59
11.1528	35.4
11.1667	35.96
11.1806	36.15
11.1945	35.46
11.2083	35.03
11.2222	35.9
11.2361	35.28
11.25	35.21
11.2639	35.15
11.2778	36.21
11.2917	36.34
11.3056	36.02
11.3195	35.84
11.3333	35.59
11.3472	35.28
11.3611	35.65
11.375	35.34
11.3889	34.9
11.4028	34.84
11.4167	34.84
11.4306	35.03
11.4445	36.96
11.4583	37.46
11.4722	36.83
11.4861	36.27
11.5	36.34
11.5139	36.27
11.5278	35.96
11.5417	35.21
11.5556	34.9
11.5695	34.21
11.5833	34.9
11.5972	34.4
11.6111	34.28
11.625	34.96
11.6389	34.46
11.6528	34.4
11.6667	35.4
11.6806	36.4
11.6945	36.77
11.7083	36.77
11.7222	36.15
11.7361	35.84
11.75	35.71
11.7639	35.71
11.7778	36.46
11.7917	36.52
11.8056	36.27
11.8195	35.46
11.8333	36.27
11.8472	35.84
11.8611	36.15
11.875	35.9
11.8889	35.9
11.9028	36.02
11.9167	35.9
11.9306	35.34
11.9445	35.21
11.9583	35.28
11.9722	35.46
11.9861	36.02
12	35.59
12.0139	36.15
12.0278	35.46
12.0417	35.21
12.0556	35.09
12.0695	35.15
12.0833	36.83
12.0972	37.27
12.1111	36.71
12.125	36.15
12.1389	35.52
12.1528	35.28
12.1667	35.71
12.1806	36.34
12.1945	36.34
12.2083	36.77
12.2222	35.77
12.2361	36.09
12.25	36.02
12.2639	35.84
12.2778	34.96
12.2917	34.71
12.3056	34.59
12.3195	35.4
12.3333	35.09
12.3472	34.59
12.3611	34.53
12.375	34.21
12.3889	34.9
12.4028	34.46
12.4167	35.34
12.4306	35.65
12.4445	36.34
12.4583	35.65
12.4722	35.34
12.4861	34.96
12.5	34.84
12.5139	34.46
12.5278	34.09
12.5417	35.52
12.5556	35.77
12.5695	35.59
12.5833	35.21
12.5972	35.34
12.6111	35.28
12.625	35.4
12.6389	36.09
12.6528	36.27
12.6667	35.96
12.6806	35.71
12.6945	35.28
12.7083	36.4
12.7222	36.4
12.7361	36.65
12.75	36.83
12.7639	37.08
12.7778	37.08
12.7917	36.34
12.8056	36.65
12.8195	37.02
12.8333	37.02
12.8472	37.02
12.8611	37.08
12.875	36.65
12.8889	36.52
12.9028	36.02
12.9167	35.59
12.9306	35.28
12.9445	35.9
12.9583	35.4
12.9722	35.28
12.9861	35.96
13	36.71
13.0139	36.09
13.0278	36.65
13.0417	36.96
13.0556	36.9
13.0695	36.46
13.0833	36.09
13.0972	35.65
13.1111	35.77
13.125	35.77
13.1389	35.28
13.1528	36.4
13.1667	36.27
13.1806	36.65
13.1945	37.27
13.2083	36.58
13.2222	36.71
13.2361	36.27
13.25	35.77
13.2639	35.4
13.2778	35.03
13.2917	35.65
13.3056	36.09
13.3195	35.77
13.3333	35.96
13.3472	35.84
13.3611	35.52
13.375	35.4
13.3889	35.77
13.4028	35.21
13.4167	35.71
13.4306	35.34
13.4445	35.4
13.4583	36.02
13.4722	36.15
13.4861	35.65
13.5	35.52
13.5139	35.15
13.5278	35.65
13.5417	35.52
13.5556	36.09
13.5695	35.9
13.5833	35.77
13.5972	35.65
13.6111	35.71
13.625	35.21
13.6389	35.03
13.6528	35.65
13.6667	36.02
13.6806	36.09
13.6945	35.59
13.7083	36.21
13.7222	35.77
13.7361	35.59
13.75	35.59
13.7639	36.46
13.7778	36.83
13.7917	36.4
13.8056	36.15
13.8195	37.71
13.8333	37.33
13.8472	36.52
13.8611	36.52
13.875	35.84
13.8889	35.52
13.9028	35.84
13.9167	36.4
13.9306	35.96
13.9445	35.96
13.9583	35.52
13.9722	35.28
13.9861	36.15
14	36.46
14.0139	36.21
14.0278	36.21
14.0417	37.15
14.0556	37.08
14.0695	37.64
14.0833	36.96
14.0972	36.46
14.1111	36.65
14.125	36.21
14.1389	36.09
14.1528	35.77
14.1667	35.9
14.1806	35.59
14.1945	36.21
14.2083	36.34
14.2222	35.46
14.2361	35.46
14.25	35.96
14.2639	35.52
14.2778	35.77
14.2917	35.71
14.3056	35.21
14.3195	34.96
14.3333	34.78
14.3472	35.34
14.3611	35.09
14.375	35.09
14.3889	34.71
14.4028	35.71
14.4167	35.28
14.4306	34.46
14.4445	33.84
14.4583	34.78
14.4722	34.46
14.4861	35.21
14.5	34.78
14.5139	35.65
14.5278	35.59
14.5417	35.65
14.5556	35.4
14.5695	35.59
14.5833	35.59
14.5972	35.34
14.6111	35.52
14.625	35.52
14.6389	35.71
14.6528	35.59
14.6667	35.65
14.6806	35.4
14.6945	35.28
14.7083	35.59
14.7222	36.27
14.7361	35.52
14.75	35.9
14.7639	36.4
14.7778	35.65
14.7917	35.21
14.8056	35.4
14.8195	36.4
14.8333	36.58
14.8472	36.34
14.8611	36.77
14.875	37.33
14.8889	36.34
14.9028	36.9
14.9167	36.02
14.9306	35.65
14.9445	35.9
14.9583	35.21
14.9722	35.09
14.9861	35.9
15	36.46
15.0139	35.71
15.0278	35.96
15.0417	35.71
15.0556	36.9
15.0695	37.33
15.0833	36.83
15.0972	36.83
15.1111	36.58
15.125	36.34
15.1389	35.71
15.1528	35.09
15.1667	34.9
15.1806	34.9
15.1945	36.15
15.2083	36.15
15.2222	36.4
15.2361	36.02
15.25	35.65
15.2639	35.84
15.2778	36.58
15.2917	36.34
15.3056	35.71
15.3195	35.52
15.3333	35.59
15.3472	35.15
15.3611	35.4
15.375	35.09
15.3889	35.03
15.4028	35.21
15.4167	34.78
15.4306	34.15
15.4445	33.72
15.4583	35.52
15.4722	35.34
15.4861	35.52
15.5	35.15
15.5139	35.34
15.5278	35.46
15.5417	35.46
15.5556	35.21
15.5695	35.03
15.5833	34.9
15.5972	34.78
15.6111	35.4
15.625	36.27
15.6389	35.84
15.6528	35.65
15.6667	35.15
15.6806	35.84
15.6945	36.02
15.7083	36.34
15.7222	36.09
15.7361	36.34
15.75	35.9
15.7639	36.09
15.7778	36.02
15.7917	36.02
15.8056	36.52
15.8195	37.21
15.8333	37.33
15.8472	36.21
15.8611	36.46
15.875	35.59
15.8889	35.09
15.9028	35.03
15.9167	36.15
15.9306	36.15
15.9445	35.9
15.9583	35.4
15.9722	35.59
15.9861	35.9
16	36.77
16.0139	36.65
16.0278	37.33
16.0417	36.96
16.0556	36.58
16.0695	36.52
16.0833	36.77
16.0972	36.27
16.1111	35.84
16.125	35.03
16.1389	34.71
16.1528	35.71
16.1667	36.09
16.1806	36.09
16.1945	35.4
16.2083	35.28
16.2222	35.77
16.2361	34.9
16.25	35.34
16.2639	35.03
16.2778	34.96
16.2917	34.71
16.3056	34.53
16.3195	35.15
16.3333	35.52
16.3472	35.21
16.3611	35.28
16.375	35.21
16.3889	35.4
16.4028	35.09
16.4167	35.46
16.4306	34.78
16.4445	34.78
16.4583	34.59
16.4722	34.4
16.4861	34.34
16.5	34.96
16.5139	35.21
16.5278	35.09
16.5417	34.09
16.5556	35.52
16.5695	35.09
16.5833	34.59
16.5972	34.28
16.6111	35.15
16.625	34.9
16.6389	34.78
16.6528	34.4
16.6667	35.4
16.6806	35.28
16.6945	34.84
16.7083	34.84
16.7222	35.15
16.7361	34.71
16.75	35.77
16.7639	35.65
16.7778	35.59
16.7917	35.28
16.8056	36.34
16.8195	36.52
16.8333	37.02
16.8472	35.84
16.8611	36.65
16.875	35.84
16.8889	35.03
16.9028	35.34
16.9167	35.21
16.9306	34.15
16.9445	35.71
16.9583	35.65
16.9722	35.59
16.9861	35.52
17	35.46
17.0139	35.52
17.0278	36.34
17.0417	36.4
17.0556	36.65
17.0695	37.08
17.0833	37.08
17.0972	36.83
17.1111	35.4
17.125	36.46
17.1389	34.9
17.1528	36.83
17.1667	36.21
17.1806	36.02
17.1945	35.9
17.2083	34.84
17.2222	34.53
17.2361	34.4
17.25	34.21
17.2639	35.03
17.2778	35.84
17.2917	35.4
17.3056	35.09
17.3195	34.96
17.3333	34.9
17.3472	34.59
17.3611	35.21
17.375	35.09
17.3889	35.15
17.4028	34.78
17.4167	34.59
17.4306	34.84
17.4445	34.71
17.4583	35.09
17.4722	35.9
17.4861	35.09
17.5	34.9
17.5139	34.71
17.5278	34.71
17.5417	34.96
17.5556	35.52
17.5695	35.4
17.5833	35.03
17.5972	34.9
17.6111	35.46
17.625	35.28
17.6389	35.28
17.6528	35.15
17.6667	34.84
17.6806	34.71
17.6945	35.21
17.7083	35.21
17.7222	35.28
17.7361	35.34
17.75	34.65
17.7639	35.03
17.7778	35.03
17.7917	36.96
17.8056	36.46
17.8195	36.9
17.8333	36.65
17.8472	35.84
17.8611	36.34
17.875	36.34
17.8889	35.96
17.9028	35.84
17.9167	35.59
17.9306	35.4
17.9445	35.4
17.9583	36.02
17.9722	36.71
17.9861	36.52
18	35.65
18.0139	35.34
18.0278	35.65
18.0417	35.71
18.0556	36.4
18.0695	37.21
18.0833	37.58
18.0972	37.33
18.1111	36.52
18.125	36.27
18.1389	36.46
18.1528	35.96
18.1667	36.58
18.1806	35.65
18.1945	35.09
18.2083	35.09
18.2222	35.09
18.2361	35.52
18.25	35.28
18.2639	35.09
18.2778	35.03
18.2917	35.09
18.3056	35.52
18.3195	35.65
18.3333	35.15
18.3472	35.03
18.3611	35.15
18.375	35.77
18.3889	35.09
18.4028	34.71
18.4167	35.77
18.4306	35.71
18.4445	34.84
18.4583	34.78
18.4722	34.84
18.4861	35.15
18.5	35.9
18.5139	35.21
18.5278	34.9
18.5417	35.34
18.5556	35.52
18.5695	35.34
18.5833	34.9
18.5972	34.34
18.6111	34.9
18.625	34.65
18.6389	35.4
18.6528	35.71
18.6667	35.65
18.6806	35.52
18.6945	35.28
18.7083	35.21
18.7222	35.84
18.7361	35.65
18.75	36.02
18.7639	35.77
18.7778	35.9
18.7917	36.9
18.8056	37.08
18.8195	36.71
18.8333	36.02
18.8472	36.4
18.8611	35.9
18.875	35.84
18.8889	35.59
18.9028	35.09
18.9167	35.59
18.9306	36.02
18.9445	36.58
18.9583	36.34
18.9722	35.9
18.9861	35.59
19	35.21
19.0139	35.96
19.0278	35.96
19.0417	36.02
19.0556	35.9
19.0695	36.52
19.0833	36.71
19.0972	37.27
19.1111	37.58
19.125	37.58
19.1389	37.02
19.1528	36.46
19.1667	37.21
19.1806	36.96
19.1945	35.9
19.2083	36.02
19.2222	36.65
19.2361	35.9
19.25	34.96
19.2639	35.4
19.2778	35.4
19.2917	35.28
19.3056	34.96
19.3195	34.78
19.3333	35.46
19.3472	35.34
19.3611	34.71
19.375	34.65
19.3889	34.84
19.4028	34.15
19.4167	34.78
19.4306	35.03
19.4445	34.71
19.4583	34.71
19.4722	34.96
19.4861	34.65
19.5	34.46
19.5139	34.71
19.5278	35.4
19.5417	34.96
19.5556	34.53
19.5695	35.96
19.5833	35.34
19.5972	34.96
19.6111	34.78
19.625	34.96
19.6389	34.34
19.6528	35.59
19.6667	35.34
19.6806	35.15
19.6945	35.4
19.7083	34.71
19.7222	34.9
19.7361	35.9
19.75	36.21
19.7639	36.21
19.7778	35.9
19.7917	36.21
19.8056	35.9
19.8195	35.96
19.8333	36.21
19.8472	36.83
19.8611	35.96
19.875	36.21
19.8889	35.28
19.9028	35.15
19.9167	34.78
19.9306	35.9
19.9445	35.9
19.9583	35.84
19.9722	36.58
19.9861	36.02
20	36.21
20.0139	36.9
20.0278	37.08
20.0417	36.77
20.0556	36.77
20.0695	36.71
20.0833	36.09
20.0972	35.96
20.1111	35.59
20.125	35.59
20.1389	36.02
20.1528	36.27
20.1667	36.27
20.1806	36.65
20.1945	36.15
20.2083	35.84
20.2222	35.71
20.2361	35.46
20.25	35.28
20.2639	35.84
20.2778	35.96
20.2917	35.9
20.3056	35.9
20.3195	35.9
20.3333	35.46
20.3472	35.15
20.3611	34.78
20.375	35.4
20.3889	35.46
20.4028	35.03
20.4167	34.9
20.4306	35.03
20.4445	34.71
20.4583	34.84
20.4722	34.59
20.4861	34.59
20.5	35.46
20.5139	35.03
20.5278	35.09
20.5417	35.09
20.5556	35.21
20.5695	35.15
20.5833	35.77
20.5972	35.59
20.6111	35.84
20.625	35.52
20.6389	35.28
20.6528	35.28
20.6667	35.59
20.6806	35.65
20.6945	36.15
20.7083	35.84
20.7222	35.52
20.7361	35.71
20.75	35.21
20.7639	35.4
20.7778	36.09
20.7917	35.46
20.8056	35.34
20.8195	35.34
20.8333	35.4
20.8472	36.02
20.8611	35.84
20.875	35.34
20.8889	35.15
20.9028	35.21
20.9167	35.09
20.9306	35.21
20.9445	34.84
20.9583	35.9
20.9722	36.27
20.9861	35.84
21	35.15
21.0139	36.46
21.0278	37.02
21.0417	37.21
21.0556	36.46
21.0695	36.21
21.0833	37.02
21.0972	36.77
21.1111	36.83
21.125	36.83
21.1389	36.27
21.1528	35.59
21.1667	36.34
21.1806	35.65
21.1945	35.09
21.2083	34.78
21.2222	34.65
21.2361	35.84
21.25	35.52
21.2639	35.52
21.2778	36.46
21.2917	35.71
21.3056	36.09
21.3195	35.71
21.3333	35.59
21.3472	35.21
21.3611	35.4
21.375	35.15
21.3889	35.03
21.4028	35.46
21.4167	35.03
21.4306	34.96
21.4445	35.15
21.4583	35.28
21.4722	35.71
21.4861	35.9
21.5	35.28
21.5139	35.15
21.5278	35.28
21.5417	35.84
21.5556	35.71
21.5695	35.28
21.5833	35.03
21.5972	35.84
21.6111	35.52
21.625	35.15
21.6389	35.28
21.6528	35.4
21.6667	35.96
21.6806	35.84
21.6945	35.46
21.7083	35.52
21.7222	35.65
21.7361	36.15
21.75	36.27
21.7639	35.96
21.7778	35.84
21.7917	36.02
21.8056	36.27
21.8195	36.52
21.8333	36.34
21.8472	35.59
21.8611	36.09
21.875	36.15
21.8889	36.34
21.9028	36.09
21.9167	35.71
21.9306	35.71
21.9445	35.46
21.9583	36.4
21.9722	36.27
21.9861	35.9
22	36.46
22.0139	37.08
22.0278	36.65
22.0417	36.9
22.0556	36.96
22.0695	36.77
22.0833	36.46
22.0972	36.34
22.1111	36.71
22.125	36.15
22.1389	35.96
22.1528	36.65
22.1667	36.4
22.1806	36.58
22.1945	36.4
22.2083	36.83
22.2222	37.83
22.2361	36.58
22.25	36.4
22.2639	36.02
22.2778	36.09
22.2917	35.4
22.3056	35.15
22.3195	35.09
22.3333	34.84
22.3472	35.77
22.3611	34.84
22.375	34.46
22.3889	34.34
22.4028	34.53
22.4167	34.03
22.4306	33.65
22.4445	34.96
22.4583	34.96
22.4722	34.71
22.4861	35.03
22.5	35.34
22.5139	34.71
22.5278	34.59
22.5417	34.96
22.5556	35.77
22.5695	35.15
22.5833	35.03
22.5972	35.34
22.6111	34.59
22.625	35.4
22.6389	35.34
22.6528	35.4
22.6667	35.34
22.6806	35.9
22.6945	35.96
22.7083	35.52
22.7222	35.52
22.7361	36.09
22.75	35.59
22.7639	35.65
22.7778	36.15
22.7917	35.9
22.8056	35.59
22.8195	36.15
22.8333	36.27
22.8472	35.84
22.8611	36.15
22.875	36.21
22.8889	35.65
22.9028	35.28
22.9167	35.77
22.9306	35.52
22.9445	35.28
22.9583	35.77
22.9722	35.52
22.9861	35.84
23	37.02
23.0139	36.9
23.0278	37.02
23.0417	35.52
23.0556	36.52
23.0695	36.52
23.0833	35.96
23.0972	35.21
23.1111	34.78
23.125	35.96
23.1389	35.84
23.1528	36.09
23.1667	35.52
23.1806	35.03
23.1945	35.28
23.2083	35.84
23.2222	35.4
23.2361	35.65
23.25	35.03
23.2639	34.59
23.2778	34.28
23.2917	35.59
23.3056	35.59
23.3195	35.09
23.3333	34.65
23.3472	35.03
23.3611	35.52
23.375	35.9
23.3889	35.28
23.4028	34.65
23.4167	34.34
23.4306	34.03
23.4445	33.59
23.4583	35.21
23.4722	35.59
23.4861	35.21
23.5	34.84
23.5139	34.78
23.5278	34.53
23.5417	34.78
23.5556	34.59
23.5695	34.59
23.5833	34.65
23.5972	34.46
23.6111	34.21
23.625	35.46
23.6389	35.96
23.6528	35.52
23.6667	34.9
23.6806	34.21
23.6945	34.9
23.7083	34.9
23.7222	34.59
23.7361	34.65
23.75	34.9
23.7639	35.65
23.7778	35.03
23.7917	35.21
23.8056	35.9
23.8195	36.21
23.8333	35.77
23.8472	36.27
23.8611	35.84
23.875	35.34
23.8889	34.78
23.9028	34.53
23.9167	35.9
23.9306	35.71
23.9445	36.21
23.9583	35.34
23.9722	36.58
23.9861	36.83
24	35.96
24.0139	35.59
24.0278	34.96
24.0417	35.84
24.0556	35.65
24.0695	35.65
24.0833	36.52
24.0972	36.83
24.1111	36.58
24.125	36.65
24.1389	35.84
24.1528	36.02
24.1667	35.71
24.1806	35.28
24.1945	35.03
24.2083	34.65
24.2222	34.78
24.2361	35.34
24.25	36.09
24.2639	35.77
24.2778	33.97
24.2917	33.15
24.3056	32.59
24.3195	32.34
24.3333	32.53
24.3472	34.09
24.3611	33.9
24.375	33.15
24.3889	34.71
24.4028	34.28
24.4167	33.9
24.4306	33.65
24.4445	33.65
24.4583	34.78
24.4722	34.46
24.4861	34.96
24.5	34.96
24.5139	35.03
24.5278	34.96
24.5417	34.46
24.5556	33.97
24.5695	34.96
24.5833	34.21
24.5972	34.34
24.6111	34.03
24.625	35.71
24.6389	35.34
24.6528	34.78
24.6667	35.09
24.6806	34.78
24.6945	34.28
24.7083	34.03
24.7222	33.28
24.7361	34.09
24.75	34.53
24.7639	34.46
24.7778	34.59
24.7917	34.15
24.8056	34.09
24.8195	34.59
24.8333	36.58
24.8472	36.77
24.8611	36.09
24.875	35.34
24.8889	36.09
24.9028	35.84
24.9167	35.46
24.9306	35.34
24.9445	35.09
24.9583	35.4
24.9722	34.84
24.9861	35.59
25	35.77
25.0139	36.27
25.0278	36.4
25.0417	36.02
25.0556	34.96
25.0695	34.34
25.0833	33.97
25.0972	32.72
25.1111	31.66
25.125	30.66
25.1389	29.47
25.1528	28.35
25.1667	27.35
25.1806	25.97
25.1945	24.85
25.2083	23.66
25.2222	22.53
25.2361	21.47
25.25	20.53
25.2639	19.59
25.2778	18.78
25.2917	18.03
25.3056	17.28
25.3195	16.59
25.3333	16.03
25.3472	15.4
25.3611	14.77
25.375	14.21
25.3889	13.77
25.4028	13.27
25.4167	12.83
25.4306	12.39
25.4445	11.95
25.4583	11.58
25.4722	11.2
25.4861	10.83
25.5	10.51
25.5139	10.26
25.5278	9.89
25.5417	9.64
25.5556	9.38
25.5695	9.13
25.5833	8.88
25.5972	8.69
25.6111	8.51
25.625	8.26
25.6389	8.07
25.6528	8.01
25.6667	7.88
25.6806	7.75
25.6945	7.57
25.7083	7.44
25.7222	7.38
25.7361	7.38
25.75	7.32
25.7639	7.38
25.7778	7.38
25.7917	7.38
25.8056	7.44
25.8195	7.5
25.8333	7.5
25.8472	7.5
25.8611	7.5
25.875	7.57
25.8889	7.63
25.9028	7.69
25.9167	7.75
25.9306	7.82
25.9445	7.88
25.9583	7.94
25.9722	8.07
25.9861	8.07
26	8.13
26.0139	8.19
26.0278	8.26
26.0417	8.32
26.0556	8.38
26.0695	8.38
26.0833	8.44
26.0972	8.51
26.1111	8.51
26.125	8.57
26.1389	8.63
26.1528	8.63
26.1667	8.69
26.1806	8.69
26.1945	8.69
26.2083	8.69
26.2222	8.76
26.2361	8.76
26.25	8.76
26.2639	8.82
26.2778	8.82
26.2917	8.82
26.3056	8.82
26.3195	8.82
26.3333	8.76
26.3472	8.69
26.3611	8.63
26.375	8.57
26.3889	8.44
26.4028	8.38
26.4167	8.26
26.4306	8.13
26.4445	8.07
26.4583	7.88
26.4722	7.75
26.4861	7.63
26.5	7.57
26.5139	7.44
26.5278	7.32
26.5417	7.19
26.5556	7.19
26.5695	7.19
26.5833	7.06
26.5972	7.06
26.6111	7
26.625	6.94
26.6389	6.88
26.6528	6.94
26.6667	6.94
26.6806	6.88
26.6945	6.81
26.7083	6.88
26.7222	6.81
26.7361	6.88
26.75	6.94
26.7639	7
26.7778	7.06
26.7917	7.13
26.8056	7.25
26.8195	7.32
26.8333	7.32
26.8472	7.38
26.8611	7.38
26.875	7.44
26.8889	7.57
26.9028	7.63
26.9167	7.63
26.9306	7.75
26.9445	7.82
26.9583	7.82
26.9722	7.94
26.9861	7.94
27	8.01
27.0139	8.07
27.0278	8.07
27.0417	8.13
27.0556	8.19
27.0695	8.19
27.0833	8.26
27.0972	8.32
27.1111	8.38
27.125	8.38
27.1389	8.51
27.1528	8.88
27.1667	9.82
27.1806	11.14
27.1945	13.65
27.2083	22.1
27.2222	32.41
27.2361	34.96
27.25	35.28
27.2639	35.21
27.2778	35.96
27.2917	36.09
27.3056	36.09
27.3195	35.96
27.3333	35.84
27.3472	35.77
27.3611	35.9
27.375	36.21
27.3889	35.84
27.4028	35.34
27.4167	35.4
27.4306	36.21
27.4445	35.84
27.4583	35.84
27.4722	35.71
27.4861	35.84
27.5	35.59
27.5139	35.65
27.5278	35.59
27.5417	35.46
27.5556	35.09
27.5695	36.27
27.5833	36.71
27.5972	36.27
27.6111	35.71
27.625	35.84
27.6389	36.27
27.6528	37.33
27.6667	37.02
27.6806	37.27
27.6945	36.83
27.7083	36.58
27.7222	37.08
27.7361	36.52
27.75	36.15
27.7639	35.65
27.7778	35.28
27.7917	35.96
27.8056	35.4
27.8195	35.59
27.8333	35.84
27.8472	35.96
27.8611	36.02
27.875	36.46
27.8889	36.4
27.9028	35.96
27.9167	35.65
27.9306	35.4
27.9445	35.09
27.9583	34.46
27.9722	35.71
27.9861	36.4
28	35.65
28.0139	34.96
28.0278	35.03
28.0417	35.4
28.0556	34.71
28.0695	34.21
28.0833	34.28
28.0972	34.96
28.1111	34.71
28.125	34.9
28.1389	35.9
28.1528	35.96
28.1667	35.4
28.1806	35.03
28.1945	35.71
28.2083	35.77
28.2222	35.71
28.2361	34.84
28.25	34.84
28.2639	34.46
28.2778	34.59
28.2917	35.65
28.3056	35.52
28.3195	35.9
28.3333	35.52
28.3472	35.4
28.3611	34.96
28.375	35.03
28.3889	34.9
28.4028	35.77
28.4167	35.15
28.4306	34.71
28.4445	34.59
28.4583	34.59
28.4722	35.52
28.4861	36.21
28.5	35.4
28.5139	34.71
28.5278	35.03
28.5417	35.21
28.5556	35.34
28.5695	34.9
28.5833	34.9
28.5972	35.46
28.6111	37.08
28.625	36.46
28.6389	36.4
28.6528	36.4
28.6667	36.21
28.6806	36.09
28.6945	35.59
28.7083	35.46
28.7222	35.52
[truncated: 6,128 more rows]

## Sheet: 8C_AN6
0.9583	37.64
0.9722	36.77
0.9861	36.4
1	36.33
1.0139	36.52
1.0278	36.46
1.0417	36.96
1.0556	36.58
1.0695	36.71
1.0833	36.65
1.0972	37.33
1.1111	36.89
1.125	36.77
1.1389	36.83
1.1528	36.4
1.1667	36.08
1.1806	36.08
1.1945	36.15
1.2083	36.33
1.2222	36.21
1.2361	36.46
1.25	36.4
1.2639	37.52
1.2778	37.02
1.2917	36.77
1.3056	36.27
1.3195	36.33
1.3333	36.15
1.3472	35.52
1.3611	36.27
1.375	36.08
1.3889	36.27
1.4028	35.77
1.4167	35.33
1.4306	35.77
1.4445	35.83
1.4583	35.27
1.4722	35.15
1.4861	35.52
1.5	36.27
1.5139	35.58
1.5278	35.33
1.5417	36.27
1.5556	36.08
1.5695	36.02
1.5833	36.21
1.5972	35.96
1.6111	36.46
1.625	36.33
1.6389	36.71
1.6528	36.33
1.6667	36.08
1.6806	36.08
1.6945	35.77
1.7083	36.08
1.7222	36.02
1.7361	36.02
1.75	36.52
1.7639	37.33
1.7778	37.71
1.7917	37.89
1.8056	37.27
1.8195	37.02
1.8333	36.77
1.8472	36.83
1.8611	37.02
1.875	37.02
1.8889	36.21
1.9028	36.02
1.9167	36.71
1.9306	37.33
1.9445	36.83
1.9583	36.96
1.9722	37.83
1.9861	37.14
2	36.52
2.0139	36.4
2.0278	36.4
2.0417	35.77
2.0556	37.14
2.0695	36.4
2.0833	36.46
2.0972	36.65
2.1111	36.96
2.125	37.64
2.1389	36.83
2.1528	36.33
2.1667	36.27
2.1806	36.15
2.1945	35.96
2.2083	36.58
2.2222	36.27
2.2361	36.4
2.25	36.77
2.2639	36.33
2.2778	36.96
2.2917	37.83
2.3056	37.27
2.3195	36.77
2.3333	36.15
2.3472	35.96
2.3611	36.71
2.375	36.46
2.3889	35.46
2.4028	35.65
2.4167	35.9
2.4306	36.21
2.4445	35.9
2.4583	35.33
2.4722	35.58
2.4861	35.71
2.5	35.71
2.5139	35.83
2.5278	35.71
2.5417	36.02
2.5556	36.65
2.5695	36.15
2.5833	35.96
2.5972	35.58
2.6111	36.21
2.625	36.08
2.6389	36.02
2.6528	35.96
2.6667	36.65
2.6806	36.71
2.6945	36.65
2.7083	36.65
2.7222	36.46
2.7361	36.4
2.75	36.89
2.7639	36.96
2.7778	36.33
2.7917	37.96
2.8056	37.33
2.8195	36.4
2.8333	36.21
2.8472	37.39
2.8611	36.89
2.875	36.65
2.8889	36.46
2.9028	36.4
2.9167	36.77
2.9306	36.52
2.9445	36.4
2.9583	37.33
2.9722	37.58
2.9861	36.96
3	37.21
3.0139	36.65
3.0278	36.27
3.0417	36.27
3.0556	37.08
3.0695	36.89
3.0833	36.27
3.0972	36.33
3.1111	36.15
3.125	36.15
3.1389	36.96
3.1528	37.39
3.1667	36.21
3.1806	35.71
3.1945	35.71
3.2083	35.4
3.2222	36.08
3.2361	36.33
3.25	36.65
3.2639	36.08
3.2778	35.9
3.2917	35.9
3.3056	36.08
3.3195	36.46
3.3333	36.21
3.3472	36.33
3.3611	36.02
3.375	36.21
3.3889	36.08
3.4028	36.4
3.4167	36.52
3.4306	37.08
3.4445	36.21
3.4583	35.96
3.4722	35.71
3.4861	36.02
3.5	36.08
3.5139	36.08
3.5278	35.83
3.5417	36.02
3.5556	36.4
3.5695	36.15
3.5833	36.15
3.5972	36.33
3.6111	36.21
3.625	36.27
3.6389	36.08
3.6528	36.33
3.6667	35.96
3.6806	35.9
3.6945	36.27
3.7083	36.4
3.7222	36.71
3.7361	35.96
3.75	36.46
3.7639	37.58
3.7778	38.14
3.7917	37.77
3.8056	37.08
3.8195	36.46
3.8333	36.08
3.8472	36.96
3.8611	36.83
3.875	36.46
3.8889	36.58
3.9028	36.89
3.9167	37.27
3.9306	36.96
3.9445	36.52
3.9583	36.65
3.9722	37.21
3.9861	37.14
4	37.02
4.0139	37.27
4.0278	36.89
4.0417	36.58
4.0556	36.65
4.0695	36.77
4.0833	36.83
4.0972	36.77
4.1111	37.02
4.125	37.21
4.1389	37.64
4.1528	37.21
4.1667	36.58
4.1806	36.02
4.1945	36.15
4.2083	36.08
4.2222	36.15
4.2361	36.83
4.25	36.96
4.2639	37.14
4.2778	36.96
4.2917	36.77
4.3056	36.27
4.3195	35.58
4.3333	35.96
4.3472	36.4
4.3611	36.15
4.375	36.08
4.3889	36.15
4.4028	35.9
4.4167	35.83
4.4306	36.83
4.4445	36.21
4.4583	36.15
4.4722	36.33
4.4861	36.02
4.5	36.15
4.5139	36.15
4.5278	36.46
4.5417	36.08
4.5556	36.27
4.5695	36.15
4.5833	35.9
4.5972	36.4
4.6111	36.27
4.625	36.4
4.6389	36.96
4.6528	36.33
4.6667	35.96
4.6806	36.89
4.6945	36.71
4.7083	36.83
4.7222	36.83
4.7361	36.83
4.75	36.65
4.7639	36.77
4.7778	36.65
4.7917	35.77
4.8056	37.71
4.8195	37.58
4.8333	37.14
4.8472	36.77
4.8611	36.15
4.875	36.15
4.8889	36.46
4.9028	36.77
4.9167	36.52
4.9306	36.96
4.9445	37.14
4.9583	36.89
4.9722	36.65
4.9861	36.27
5	36.71
5.0139	36.65
5.0278	36.83
5.0417	36.83
5.0556	36.46
5.0695	36.77
5.0833	36.33
5.0972	36.08
5.1111	36.65
5.125	36.46
5.1389	36.4
5.1528	36.4
5.1667	36.77
5.1806	37.21
5.1945	37.08
5.2083	36.46
5.2222	35.83
5.2361	36.27
5.25	36.46
5.2639	36.33
5.2778	36.33
5.2917	36.4
5.3056	35.9
5.3195	36.46
5.3333	36.08
5.3472	36.21
5.3611	36.15
5.375	35.96
5.3889	36.08
5.4028	35.9
5.4167	35.71
5.4306	35.83
5.4445	36.21
5.4583	36.71
5.4722	36.46
5.4861	36.15
5.5	35.65
5.5139	36.08
5.5278	36.4
5.5417	36.08
5.5556	35.71
5.5695	35.58
5.5833	35.58
5.5972	36.33
5.6111	36.27
5.625	35.9
5.6389	36.27
5.6528	36.27
5.6667	36.21
5.6806	36.27
5.6945	36.15
5.7083	36.08
5.7222	36.08
5.7361	36.15
5.75	36.71
5.7639	37.21
5.7778	37.21
5.7917	37.58
5.8056	37.39
5.8195	36.65
5.8333	36.33
5.8472	36.27
5.8611	36.65
5.875	36.71
5.8889	36.08
5.9028	36.71
5.9167	36.46
5.9306	36.21
5.9445	36.27
5.9583	36.83
5.9722	37.58
5.9861	36.96
6	36.77
6.0139	36.02
6.0278	35.9
6.0417	35.71
6.0556	36.15
6.0695	36.21
6.0833	37.02
6.0972	36.52
6.1111	36.27
6.125	36.15
6.1389	36.33
6.1528	36.4
6.1667	36.21
6.1806	36.27
6.1945	35.9
6.2083	37.14
6.2222	37.58
6.2361	37.52
6.25	36.27
6.2639	35.9
6.2778	35.96
6.2917	36.52
6.3056	36.58
6.3195	36.33
6.3333	35.96
6.3472	35.65
6.3611	35.83
6.375	35.77
6.3889	35.77
6.4028	36.27
6.4167	35.96
6.4306	36.02
6.4445	36.08
6.4583	36.08
6.4722	36.46
6.4861	35.77
6.5	35.9
6.5139	36.15
6.5278	35.96
6.5417	36.96
6.5556	37.08
6.5695	36.77
6.5833	35.71
6.5972	35.33
6.6111	35.02
6.625	34.9
6.6389	35.33
6.6528	35.33
6.6667	35.4
6.6806	35.9
6.6945	35.46
6.7083	35.4
6.7222	36.65
6.7361	36.83
6.75	36.02
6.7639	36.27
6.7778	37.27
6.7917	37.71
6.8056	37.64
6.8195	36.89
6.8333	36.46
6.8472	36.27
6.8611	36.89
6.875	36.27
6.8889	35.96
6.9028	36.15
6.9167	36.58
6.9306	35.77
6.9445	36.71
6.9583	36.27
6.9722	36.15
6.9861	35.77
7	36.15
7.0139	36.96
7.0278	36.96
7.0417	36.65
7.0556	37.71
7.0695	37.14
7.0833	36.71
7.0972	36.71
7.1111	36.27
7.125	36.52
7.1389	36.65
7.1528	36.52
7.1667	36.77
7.1806	36.33
7.1945	36.4
7.2083	36.46
7.2222	37.71
7.2361	37.64
7.25	36.58
7.2639	36.21
7.2778	35.9
7.2917	35.52
7.3056	35.4
7.3195	35.27
7.3333	35.21
7.3472	34.71
7.3611	35.58
7.375	36.21
7.3889	36.52
7.4028	36.33
7.4167	35.77
7.4306	35.4
7.4445	35.27
7.4583	35.33
7.4722	35.21
7.4861	35.21
7.5	35.65
7.5139	36.08
7.5278	35.96
7.5417	35.65
7.5556	35.4
7.5695	35.52
7.5833	35.65
7.5972	36.02
7.6111	35.33
7.625	35.4
7.6389	35.65
7.6528	35.65
7.6667	35.09
7.6806	35.96
7.6945	35.58
7.7083	36.21
7.7222	35.96
7.7361	35.9
7.75	36.15
7.7639	36.58
7.7778	37.52
7.7917	37.52
7.8056	36.65
7.8195	36.21
7.8333	36.08
7.8472	36.15
7.8611	36.27
7.875	35.9
7.8889	36.21
7.9028	36.46
7.9167	36.52
7.9306	36.27
7.9445	36.08
7.9583	36.52
7.9722	36.71
7.9861	36.89
8	36.71
8.0139	36.52
8.0278	36.02
8.0417	36.21
8.0556	36.02
8.0695	36.02
8.0833	35.83
8.0972	37.33
8.1111	36.89
8.125	36.21
8.1389	35.71
8.1528	35.83
8.1667	36.71
8.1806	36.65
8.1945	36.33
8.2083	36.46
8.2222	36.83
8.2361	37.58
8.25	36.65
8.2639	36.4
8.2778	35.77
8.2917	35.33
8.3056	35.65
8.3195	35.9
8.3333	36.15
8.3472	35.83
8.3611	36.58
8.375	36.71
8.3889	35.77
8.4028	35.52
8.4167	36.02
8.4306	35.52
8.4445	35.27
8.4583	35.21
8.4722	35.65
8.4861	35.83
8.5	35.9
8.5139	35.83
8.5278	35.71
8.5417	36.15
8.5556	35.83
8.5695	35.58
8.5833	36.02
8.5972	35.52
8.6111	35.52
8.625	36.58
8.6389	35.9
8.6528	36.21
8.6667	36.02
8.6806	36.21
8.6945	36.15
8.7083	36.21
8.7222	36.15
8.7361	36.27
8.75	35.77
8.7639	35.96
8.7778	36.08
8.7917	36.15
8.8056	37.46
8.8195	37.27
8.8333	36.4
8.8472	36.08
8.8611	36.46
8.875	36.58
8.8889	36.77
8.9028	36.96
8.9167	36.58
8.9306	36.21
8.9445	36.21
8.9583	36.65
8.9722	37.14
8.9861	36.33
9	35.83
9.0139	36.27
9.0278	36.52
9.0417	36.21
9.0556	36.08
9.0695	36.33
9.0833	36.15
9.0972	35.9
9.1111	36.4
9.125	36.21
9.1389	36.27
9.1528	36.52
9.1667	36.52
9.1806	37.83
9.1945	37.46
9.2083	36.65
9.2222	36.21
9.2361	35.9
9.25	35.9
9.2639	36.08
9.2778	36.4
9.2917	36.08
9.3056	35.65
9.3195	35.71
9.3333	35.77
9.3472	36.21
9.3611	36.46
9.375	35.9
9.3889	35.58
9.4028	35.46
9.4167	35.15
9.4306	35.58
9.4445	35.46
9.4583	35.77
9.4722	35.58
9.4861	36.33
9.5	36.27
9.5139	35.83
9.5278	35.58
9.5417	35.52
9.5556	35.52
9.5695	35.71
9.5833	35.71
9.5972	35.9
9.6111	35.9
9.625	35.65
9.6389	35.4
9.6528	35.9
9.6667	36.4
9.6806	36.27
9.6945	36.4
9.7083	36.15
9.7222	36.02
9.7361	36.4
9.75	36.89
9.7639	36.89
9.7778	36.58
9.7917	36.58
9.8056	37.02
9.8195	36.83
9.8333	37.33
9.8472	36.83
9.8611	36.46
9.875	35.77
9.8889	36.4
9.9028	35.96
9.9167	36.46
9.9306	36.27
9.9445	36.77
9.9583	36.08
9.9722	36.33
9.9861	36.89
10	36.96
10.0139	36.89
10.0278	36.46
10.0417	36.02
10.0556	35.9
10.0695	35.96
10.0833	36.52
10.0972	36.83
10.1111	36.08
10.125	35.9
10.1389	36.15
10.1528	35.65
10.1667	35.4
10.1806	35.52
10.1945	36.27
10.2083	36.33
10.2222	36.89
10.2361	35.96
10.25	35.46
10.2639	35.15
10.2778	36.52
10.2917	36.65
10.3056	36.77
10.3195	36.15
10.3333	35.27
10.3472	34.9
10.3611	35.27
10.375	35.46
10.3889	36.08
10.4028	35.83
10.4167	35.52
10.4306	35.33
10.4445	36.27
10.4583	36.08
10.4722	35.71
10.4861	35.52
10.5	36.15
10.5139	35.58
10.5278	36.08
10.5417	36.27
10.5556	36.4
10.5695	35.52
10.5833	35.77
10.5972	35.21
10.6111	36.15
10.625	36.08
10.6389	35.33
10.6528	35.52
10.6667	35.21
10.6806	35.15
10.6945	36.15
10.7083	35.77
10.7222	35.77
10.7361	35.77
10.75	36.02
10.7639	36.71
10.7778	37.64
10.7917	37.83
10.8056	37.02
10.8195	36.52
10.8333	35.96
10.8472	35.96
10.8611	36.21
10.875	36.08
10.8889	36.02
10.9028	36.08
10.9167	36.27
10.9306	36.77
10.9445	37.14
10.9583	36.4
10.9722	36.21
10.9861	36.33
11	37.21
11.0139	37.21
11.0278	37.27
11.0417	36.89
11.0556	36.21
11.0695	35.9
11.0833	35.15
11.0972	35.46
11.1111	35.83
11.125	35.27
11.1389	36.02
11.1528	35.96
11.1667	35.77
11.1806	35.83
11.1945	36.46
11.2083	36.96
11.2222	36.58
11.2361	36.83
11.25	37.39
11.2639	36.33
11.2778	35.83
11.2917	35.4
11.3056	35.4
11.3195	35.71
11.3333	35.71
11.3472	35.77
11.3611	35.27
11.375	34.9
11.3889	35.83
11.4028	35.77
11.4167	35.15
11.4306	34.77
11.4445	37.21
11.4583	37.83
11.4722	37.27
11.4861	36.96
11.5	36.27
11.5139	35.96
11.5278	35.77
11.5417	35.65
11.5556	35.83
11.5695	35.4
11.5833	36.27
11.5972	36.02
11.6111	35.4
11.625	35.83
11.6389	35.65
11.6528	36.15
11.6667	35.77
11.6806	35.83
11.6945	36.08
11.7083	35.71
11.7222	35.71
11.7361	36.33
11.75	37.08
11.7639	36.89
11.7778	37.77
11.7917	37.89
11.8056	37.33
11.8195	36.83
11.8333	36.21
11.8472	36.15
11.8611	36.71
11.875	36.46
11.8889	36.08
11.9028	36.21
11.9167	36.15
11.9306	36.21
11.9445	36.46
11.9583	36.4
11.9722	36.08
11.9861	36.77
12	36.83
12.0139	36.15
12.0278	36.15
12.0417	36.4
12.0556	36.33
12.0695	36.77
12.0833	35.77
12.0972	35.33
12.1111	35.21
12.125	36.83
12.1389	36.77
12.1528	36.27
12.1667	35.83
12.1806	35.96
12.1945	36.21
12.2083	36.71
12.2222	36.52
12.2361	37.39
12.25	37.33
12.2639	36.96
12.2778	36.15
12.2917	35.21
12.3056	34.77
12.3195	34.46
12.3333	36.27
12.3472	35.27
12.3611	35.52
12.375	35.65
12.3889	35.9
12.4028	35.46
12.4167	35.96
12.4306	36.96
12.4445	36.4
12.4583	35.83
12.4722	35.77
12.4861	35.33
12.5	36.15
12.5139	36.27
12.5278	35.58
12.5417	36.52
12.5556	36.4
12.5695	36.15
12.5833	35.96
12.5972	35.71
12.6111	36.71
12.625	35.77
12.6389	35.46
12.6528	35.77
12.6667	35.71
12.6806	36.21
12.6945	36.83
12.7083	36.46
12.7222	36.52
12.7361	37.08
12.75	36.52
12.7639	36.65
12.7778	37.64
12.7917	38.08
12.8056	37.58
12.8195	36.83
12.8333	36.33
12.8472	36.83
12.8611	36.96
12.875	36.15
12.8889	35.83
12.9028	35.58
12.9167	37.14
12.9306	36.89
12.9445	35.9
12.9583	36.02
12.9722	36.4
12.9861	36.83
13	37.33
13.0139	36.52
13.0278	35.83
13.0417	36.58
13.0556	36.65
13.0695	36.15
13.0833	35.9
13.0972	36.4
13.1111	35.65
13.125	35.52
13.1389	36.83
13.1528	37.02
13.1667	36.58
13.1806	36.71
13.1945	36.33
13.2083	36.27
13.2222	35.83
13.2361	36.65
13.25	36.58
13.2639	37.33
13.2778	37.71
13.2917	37.21
13.3056	36.27
13.3195	35.77
13.3333	35.71
13.3472	35.96
13.3611	37.08
13.375	36.83
13.3889	35.46
13.4028	35.09
13.4167	34.34
13.4306	34.59
13.4445	35.09
13.4583	34.77
13.4722	35.52
13.4861	35.65
13.5	35.33
13.5139	35.46
13.5278	35.33
13.5417	34.9
13.5556	36.15
13.5695	35.58
13.5833	35.4
13.5972	35.4
13.6111	35.09
13.625	35.9
13.6389	35.71
13.6528	35.77
13.6667	35.58
13.6806	36.4
13.6945	36.21
13.7083	36.65
13.7222	36.21
13.7361	36.33
13.75	36.96
13.7639	37.08
13.7778	37.89
13.7917	37.64
13.8056	36.71
13.8195	36.33
13.8333	35.96
13.8472	36.77
13.8611	36.83
13.875	36.02
13.8889	36.4
13.9028	37.27
13.9167	36.83
13.9306	36.21
13.9445	36.27
13.9583	36.77
13.9722	36.46
13.9861	37.14
14	36.96
14.0139	36.4
14.0278	36.08
14.0417	35.96
14.0556	36.21
14.0695	36.96
14.0833	37.02
14.0972	36.46
14.1111	36.15
14.125	36.96
14.1389	36.52
14.1528	36.15
14.1667	36.08
14.1806	36.15
14.1945	36.96
14.2083	37.02
14.2222	36.27
14.2361	36.02
14.25	36.02
14.2639	36.02
14.2778	36.58
14.2917	36.33
14.3056	35.71
14.3195	36.52
14.3333	36.21
14.3472	36.08
14.3611	35.96
14.375	35.83
14.3889	36.46
14.4028	36.08
14.4167	35.4
14.4306	35.27
14.4445	35.27
14.4583	35.21
14.4722	35.15
14.4861	35.4
14.5	35.4
14.5139	35.58
14.5278	35.83
14.5417	35.4
14.5556	35.52
14.5695	35.65
14.5833	36.33
14.5972	35.83
14.6111	35.77
14.625	35.46
14.6389	35.83
14.6528	35.9
14.6667	36.4
14.6806	36.33
14.6945	36.15
14.7083	36.27
14.7222	36.08
14.7361	36.21
14.75	36.77
14.7639	36.52
14.7778	36.77
14.7917	37.52
14.8056	37.08
14.8195	36.33
14.8333	36.08
14.8472	36.4
14.8611	37.21
14.875	36.33
14.8889	35.83
14.9028	35.77
14.9167	35.96
14.9306	36.21
14.9445	36.21
14.9583	36.46
14.9722	37.58
14.9861	37.27
15	36.83
15.0139	36.46
15.0278	36.15
15.0417	35.83
15.0556	35.52
15.0695	36.71
15.0833	36.15
15.0972	36.02
15.1111	36.15
15.125	37.14
15.1389	36.71
15.1528	36.33
15.1667	36.21
15.1806	36.21
15.1945	36.77
15.2083	36.08
15.2222	35.83
15.2361	35.4
15.25	35.46
15.2639	36.46
15.2778	36.15
15.2917	35.83
15.3056	35.71
15.3195	35.71
15.3333	36.21
15.3472	36.02
15.3611	35.46
15.375	35.15
15.3889	34.9
15.4028	34.96
15.4167	35.4
15.4306	35.52
15.4445	35.83
15.4583	35.4
15.4722	35.33
15.4861	35.46
15.5	35.83
15.5139	35.71
15.5278	35.15
15.5417	36.02
15.5556	35.58
15.5695	35.52
15.5833	35.27
15.5972	35.4
15.6111	34.96
15.625	35.77
15.6389	36.52
15.6528	36.02
15.6667	35.71
15.6806	35.52
15.6945	35.33
15.7083	36.33
15.7222	36.15
15.7361	36.02
15.75	36.65
15.7639	36.77
15.7778	37.33
15.7917	37.21
15.8056	36.65
15.8195	36.27
15.8333	36.96
15.8472	36.96
15.8611	36.15
15.875	35.96
15.8889	36.21
15.9028	36.83
15.9167	36.27
15.9306	36.46
15.9445	36.89
15.9583	36.58
15.9722	35.96
15.9861	35.52
16	35.46
16.0139	35.83
16.0278	36.71
16.0417	36.83
16.0556	36.89
16.0695	36.96
16.0833	36.21
16.0972	35.77
16.1111	35.77
16.125	36.02
16.1389	36.08
16.1528	36.71
16.1667	36.52
16.1806	36.02
16.1945	35.33
16.2083	35.83
16.2222	36.65
16.2361	36.27
16.25	35.83
16.2639	35.71
16.2778	35.9
16.2917	36.21
16.3056	35.71
16.3195	35.4
16.3333	35.33
16.3472	36.52
16.3611	35.4
16.375	34.4
16.3889	34.77
16.4028	35.21
16.4167	35.27
16.4306	35.77
16.4445	35.46
16.4583	35.71
16.4722	35.58
16.4861	35.9
16.5	35.96
16.5139	35.33
16.5278	34.96
16.5417	35.77
16.5556	35.4
16.5695	35.4
16.5833	35.21
16.5972	35.52
16.6111	35.33
16.625	35.65
16.6389	35.65
16.6528	35.09
16.6667	34.84
16.6806	35.15
16.6945	34.96
16.7083	34.9
16.7222	36.21
16.7361	36.08
16.75	36.89
16.7639	36.58
16.7778	36.4
16.7917	36.33
16.8056	37.46
16.8195	37.58
16.8333	36.89
16.8472	35.96
16.8611	35.96
16.875	37.27
16.8889	36.21
16.9028	35.71
16.9167	35.58
16.9306	36.46
16.9445	35.96
16.9583	36.02
16.9722	36.4
16.9861	36.58
17	36.02
17.0139	35.83
17.0278	36.71
17.0417	37.14
17.0556	37.02
17.0695	37.08
17.0833	36.58
17.0972	36.21
17.1111	35.9
17.125	36.21
17.1389	36.4
17.1528	35.65
17.1667	35.27
17.1806	35.21
17.1945	35.83
17.2083	36.02
17.2222	36.4
17.2361	36.71
17.25	36.15
17.2639	36.46
17.2778	36.02
17.2917	35.77
17.3056	35.83
17.3195	36.02
17.3333	36.08
17.3472	35.71
17.3611	35.46
17.375	35.15
17.3889	35.27
17.4028	35.02
17.4167	36.21
17.4306	35.96
17.4445	35.96
17.4583	35.27
17.4722	35.46
17.4861	35.52
17.5	35.4
17.5139	35.77
17.5278	35.4
17.5417	35.02
17.5556	35.83
17.5695	35.77
17.5833	35.09
17.5972	35.58
17.6111	35.21
17.625	35.71
17.6389	35.46
17.6528	35.21
17.6667	35.52
17.6806	35.33
17.6945	35.09
17.7083	35.58
17.7222	36.46
17.7361	36.58
17.75	36.15
17.7639	36.21
17.7778	36.83
17.7917	37.71
17.8056	37.71
17.8195	37.08
17.8333	36.4
17.8472	36.27
17.8611	36.27
17.875	36.65
17.8889	36.77
17.9028	36.08
17.9167	35.9
17.9306	35.96
17.9445	36.21
17.9583	36.52
17.9722	35.9
17.9861	35.96
18	36.02
18.0139	35.77
18.0278	35.96
18.0417	36.65
18.0556	37.02
18.0695	36.71
18.0833	36.33
18.0972	35.9
18.1111	36.02
18.125	37.02
18.1389	36.58
18.1528	35.96
18.1667	35.71
18.1806	35.71
18.1945	36.33
18.2083	36.46
18.2222	35.96
18.2361	36.02
18.25	36.27
18.2639	36.52
18.2778	36.33
18.2917	35.96
18.3056	36.02
18.3195	35.96
18.3333	36.58
18.3472	35.9
18.3611	35.4
18.375	35.21
18.3889	34.52
18.4028	35.46
18.4167	35.09
18.4306	35.09
18.4445	34.77
18.4583	35.15
18.4722	35.71
18.4861	35.09
18.5	35.15
18.5139	36.15
18.5278	35.71
18.5417	35.83
18.5556	35.4
18.5695	35.71
18.5833	35.96
18.5972	35.46
18.6111	35.33
18.625	35.96
18.6389	35.4
18.6528	35.4
18.6667	35.46
18.6806	35.65
18.6945	35.46
18.7083	35.9
18.7222	35.77
18.7361	36.27
18.75	36.02
18.7639	35.9
18.7778	37.14
18.7917	37.77
18.8056	37.33
18.8195	36.27
18.8333	35.71
18.8472	36.02
18.8611	36.52
18.875	37.33
18.8889	36.71
18.9028	36.27
18.9167	36.02
18.9306	37.02
18.9445	37.83
18.9583	37.33
18.9722	37.27
18.9861	36.58
19	36.02
19.0139	35.77
19.0278	36.08
19.0417	36.33
19.0556	35.65
19.0695	35.83
19.0833	35.9
19.0972	36.58
19.1111	37.27
19.125	37.27
19.1389	37.52
19.1528	37.33
19.1667	36.52
19.1806	36.08
19.1945	35.9
19.2083	35.83
19.2222	36.4
19.2361	36.27
19.25	35.83
19.2639	36.58
19.2778	37.46
19.2917	37.08
19.3056	36.83
19.3195	36.52
19.3333	36.33
19.3472	36.02
19.3611	36.27
19.375	35.46
19.3889	35.02
19.4028	35.09
19.4167	35.71
19.4306	35.65
19.4445	35.15
19.4583	35.9
19.4722	35.96
19.4861	35.65
19.5	35.52
19.5139	35.02
19.5278	35.33
19.5417	35.9
19.5556	35.9
19.5695	35.46
19.5833	35.83
19.5972	35.9
19.6111	35.65
19.625	36.02
19.6389	36.27
19.6528	35.83
19.6667	35.96
19.6806	35.96
19.6945	35.9
19.7083	35.58
19.7222	35.27
19.7361	36.21
19.75	36.58
19.7639	36.21
19.7778	37.08
19.7917	37.33
19.8056	36.96
19.8195	36.27
19.8333	35.96
19.8472	35.9
19.8611	35.65
19.875	36.4
19.8889	36.15
19.9028	35.9
19.9167	36.46
19.9306	36.89
19.9445	36.15
19.9583	36.21
19.9722	36.33
19.9861	37.39
20	37.46
20.0139	37.08
20.0278	36.4
20.0417	36.15
20.0556	36.08
20.0695	36.46
20.0833	35.65
20.0972	35.77
20.1111	36.52
20.125	36.21
20.1389	36.08
20.1528	35.96
20.1667	36.27
20.1806	36.52
20.1945	36.77
20.2083	36.02
20.2222	35.96
20.2361	35.83
20.25	35.65
20.2639	37.21
20.2778	36.71
20.2917	36.02
20.3056	35.15
20.3195	34.9
20.3333	35.83
20.3472	35.09
20.3611	35.27
20.375	35.4
20.3889	35.33
20.4028	35.09
20.4167	34.96
20.4306	35.58
20.4445	35.15
20.4583	35.4
20.4722	35.33
20.4861	35.46
20.5	34.9
20.5139	35.83
20.5278	36.33
20.5417	35.96
20.5556	36.27
20.5695	36.02
20.5833	35.9
20.5972	35.9
20.6111	36.02
20.625	36.65
20.6389	36.15
20.6528	35.83
20.6667	35.52
20.6806	35.65
20.6945	35.9
20.7083	35.77
20.7222	36.58
20.7361	35.96
20.75	36.21
20.7639	37.02
20.7778	38.02
20.7917	37.96
20.8056	36.89
20.8195	36.08
20.8333	35.9
20.8472	35.77
20.8611	37.02
20.875	37.14
20.8889	36.46
20.9028	35.77
20.9167	36.27
20.9306	36.65
20.9445	37.02
20.9583	36.27
20.9722	36.21
20.9861	36.27
21	36.65
21.0139	36.46
21.0278	36.27
21.0417	36.83
21.0556	37.27
21.0695	36.58
21.0833	35.65
21.0972	35.4
21.1111	35.71
21.125	36.46
21.1389	36.71
21.1528	36.02
21.1667	35.52
21.1806	35.02
21.1945	36.4
21.2083	35.9
21.2222	35.4
21.2361	35.65
21.25	36.77
21.2639	36.65
21.2778	36.27
21.2917	35.4
21.3056	35.46
21.3195	35.96
21.3333	35.9
21.3472	35.46
21.3611	36.15
21.375	36.46
21.3889	35.9
21.4028	35.52
21.4167	35.09
21.4306	35.15
21.4445	35.27
21.4583	35.09
21.4722	36.08
21.4861	36.21
21.5	35.96
21.5139	36.02
21.5278	35.77
21.5417	35.27
21.5556	35.71
21.5695	35.27
21.5833	36.21
21.5972	35.77
21.6111	35.33
21.625	35.71
21.6389	35.65
21.6528	36.46
21.6667	35.9
21.6806	36.21
21.6945	36.02
21.7083	35.9
21.7222	36.4
21.7361	36.96
21.75	37.39
21.7639	36.52
21.7778	36.83
21.7917	36.27
21.8056	36.83
21.8195	36.71
21.8333	36.58
21.8472	35.96
21.8611	36.02
21.875	35.83
21.8889	36.65
21.9028	36.33
21.9167	36.58
21.9306	36.58
21.9445	36.08
21.9583	35.52
21.9722	36.02
21.9861	36.65
22	36.33
22.0139	35.65
22.0278	35.96
22.0417	36.02
22.0556	35.83
22.0695	35.46
22.0833	36.27
22.0972	36.58
22.1111	37.14
22.125	36.58
22.1389	35.9
22.1528	35.77
22.1667	35.77
22.1806	35.9
22.1945	36.46
22.2083	35.71
22.2222	35.27
22.2361	36.15
22.25	37.14
22.2639	36.65
22.2778	36.21
22.2917	35.46
22.3056	35.83
22.3195	36.27
22.3333	36.08
22.3472	35.9
22.3611	35.58
22.375	34.96
22.3889	35.33
22.4028	35.09
22.4167	34.77
22.4306	35.4
22.4445	34.71
22.4583	35.27
22.4722	35.96
22.4861	35.9
22.5	35.71
22.5139	35.27
22.5278	35.4
22.5417	35.65
22.5556	35.9
22.5695	35.52
22.5833	35.21
22.5972	34.77
22.6111	36.02
22.625	36.71
22.6389	36.08
22.6528	35.71
22.6667	35.65
22.6806	35.58
22.6945	35.33
22.7083	36.08
22.7222	35.77
22.7361	35.71
22.75	35.9
22.7639	36.58
22.7778	37.46
22.7917	37.39
22.8056	36.83
22.8195	36.52
22.8333	35.83
22.8472	35.58
22.8611	35.4
22.875	36.21
22.8889	36.65
22.9028	36.46
22.9167	36.15
22.9306	37.14
22.9445	36.21
22.9583	35.33
22.9722	35.15
22.9861	35.96
23	36.27
23.0139	36.96
23.0278	36.4
23.0417	35.77
23.0556	35.52
23.0695	36.08
23.0833	35.83
23.0972	35.21
23.1111	35.58
23.125	35.02
23.1389	35.52
23.1528	36.21
23.1667	36.89
23.1806	36.4
23.1945	35.71
23.2083	35.4
23.2222	35.83
23.2361	36.52
23.25	36.15
23.2639	35.33
23.2778	35.65
23.2917	35.58
23.3056	35.15
23.3195	34.52
23.3333	35.02
23.3472	34.46
23.3611	35.65
23.375	35.9
23.3889	35.58
23.4028	35.15
23.4167	34.84
23.4306	34.96
23.4445	35.21
23.4583	36.46
23.4722	35.58
23.4861	36.02
23.5	35.52
23.5139	35.15
23.5278	35.15
23.5417	35.4
23.5556	35.52
23.5695	35.27
23.5833	34.77
23.5972	35.58
23.6111	35.83
23.625	36.65
23.6389	36.46
23.6528	35.71
23.6667	34.71
23.6806	34.84
23.6945	36.15
23.7083	35.33
23.7222	34.96
23.7361	35.4
23.75	36.46
23.7639	36.65
23.7778	35.9
23.7917	36.02
23.8056	36.96
23.8195	37.64
23.8333	37.77
23.8472	37.33
23.8611	36.4
23.875	35.65
23.8889	34.84
23.9028	35.09
23.9167	36.15
23.9306	37.14
23.9445	37.21
23.9583	35.96
23.9722	35.58
23.9861	35.46
24	36.33
24.0139	35.77
24.0278	35.77
24.0417	35.27
24.0556	35.21
24.0695	36.02
24.0833	36.83
24.0972	36.27
24.1111	36.21
24.125	36.71
24.1389	37.39
24.1528	36.89
24.1667	36.65
24.1806	35.4
24.1945	34.96
24.2083	35.02
24.2222	36.33
24.2361	35.71
24.25	35.21
24.2639	34.77
24.2778	35.09
24.2917	35.9
24.3056	36.4
24.3195	35.83
24.3333	34.96
24.3472	35.02
24.3611	34.65
24.375	34.59
24.3889	34.9
24.4028	35.09
24.4167	34.96
24.4306	34.34
24.4445	34.4
24.4583	34.46
24.4722	35.02
24.4861	35.58
24.5	35.27
24.5139	35.15
24.5278	35.33
24.5417	34.65
24.5556	35.58
24.5695	35.33
24.5833	35.33
24.5972	34.77
24.6111	35.02
24.625	35.15
24.6389	36.77
24.6528	36.65
24.6667	36.02
24.6806	35.58
24.6945	35.09
24.7083	35.77
24.7222	35.02
24.7361	35.09
24.75	36.46
24.7639	36.27
24.7778	36.21
24.7917	36.52
24.8056	37.46
24.8195	37.77
24.8333	36.83
24.8472	36.33
24.8611	36.15
24.875	36.46
24.8889	37.08
24.9028	35.9
24.9167	35.46
24.9306	35.77
24.9445	36.4
24.9583	35.71
24.9722	35.83
24.9861	36.15
25	36.08
25.0139	36.89
25.0278	37.14
25.0417	37.64
25.0556	36.77
25.0695	35.65
25.0833	33.77
25.0972	32.9
25.1111	31.71
25.125	31.03
25.1389	29.78
25.1528	28.53
25.1667	27.47
25.1806	26.15
25.1945	24.72
25.2083	23.34
25.2222	22.15
25.2361	21.03
25.25	20.03
25.2639	19.03
25.2778	18.15
25.2917	17.4
25.3056	16.59
25.3195	15.96
25.3333	15.34
25.3472	14.71
25.3611	14.08
25.375	13.58
25.3889	13.08
25.4028	12.58
25.4167	12.14
25.4306	11.7
25.4445	11.33
25.4583	11.01
25.4722	10.58
25.4861	10.26
25.5	9.95
25.5139	9.64
25.5278	9.32
25.5417	9.14
25.5556	8.95
25.5695	8.7
25.5833	8.51
25.5972	8.38
25.6111	8.2
25.625	8.07
25.6389	8.01
25.6528	8.01
25.6667	7.95
25.6806	7.82
25.6945	7.69
25.7083	7.69
25.7222	7.76
25.7361	7.82
25.75	7.82
25.7639	7.82
25.7778	7.88
25.7917	7.88
25.8056	7.88
25.8195	7.88
25.8333	7.88
25.8472	7.82
25.8611	7.82
25.875	7.82
25.8889	7.88
25.9028	7.88
25.9167	7.95
25.9306	8.01
25.9445	8.01
25.9583	8.07
25.9722	8.13
25.9861	8.2
26	8.26
26.0139	8.26
26.0278	8.26
26.0417	8.32
26.0556	8.38
26.0695	8.38
26.0833	8.45
26.0972	8.51
26.1111	8.51
26.125	8.57
26.1389	8.63
26.1528	8.57
26.1667	8.63
26.1806	8.63
26.1945	8.63
26.2083	8.63
26.2222	8.7
26.2361	8.63
26.25	8.7
26.2639	8.7
26.2778	8.7
26.2917	8.7
26.3056	8.76
26.3195	8.7
26.3333	8.63
26.3472	8.57
26.3611	8.51
26.375	8.45
26.3889	8.32
26.4028	8.2
26.4167	8.07
26.4306	7.95
26.4445	7.82
26.4583	7.63
26.4722	7.51
26.4861	7.44
26.5	7.32
26.5139	7.19
26.5278	7.07
26.5417	7.07
26.5556	7.07
26.5695	7.07
26.5833	7.01
26.5972	7.07
26.6111	7.32
26.625	7.88
26.6389	8.7
26.6528	9.82
26.6667	11.64
26.6806	14.71
26.6945	23.09
26.7083	31.78
26.7222	34.96
26.7361	35.02
26.75	35.77
26.7639	35.09
26.7778	34.96
26.7917	35.83
26.8056	35.52
26.8195	35.52
26.8333	35.46
26.8472	35.65
26.8611	35.83
26.875	35.27
26.8889	35.9
26.9028	36.46
26.9167	36.33
26.9306	35.46
26.9445	35.21
26.9583	35.27
26.9722	35.52
26.9861	35.15
27	35.27
27.0139	35.15
27.0278	35.83
27.0417	35.71
27.0556	35.71
27.0695	36.83
27.0833	35.96
27.0972	35.52
27.1111	36.02
27.125	36.89
27.1389	36.27
27.1528	36.08
27.1667	36.08
27.1806	35.58
27.1945	35.83
27.2083	35.9
27.2222	36.21
27.2361	36.77
27.25	37.33
27.2639	37.33
27.2778	37.02
27.2917	36.52
27.3056	36.08
27.3195	36.71
27.3333	36.15
27.3472	36.02
27.3611	36.15
27.375	35.33
27.3889	34.21
27.4028	32.21
27.4167	30.72
27.4306	29.28
27.4445	28.22
27.4583	27.53
27.4722	26.59
27.4861	24.9
27.5	23.53
27.5139	22.03
27.5278	20.72
27.5417	19.65
27.5556	18.53
27.5695	17.53
27.5833	16.65
27.5972	15.77
27.6111	15.02
27.625	14.27
27.6389	13.58
27.6528	12.96
27.6667	12.39
27.6806	11.83
27.6945	11.27
27.7083	10.83
27.7222	10.45
27.7361	10.08
27.75	9.76
27.7639	9.51
27.7778	9.26
27.7917	9.01
27.8056	8.82
27.8195	8.7
27.8333	8.57
27.8472	8.45
27.8611	8.32
27.875	8.2
27.8889	8.13
27.9028	8.07
27.9167	8.01
27.9306	7.95
27.9445	7.88
27.9583	7.88
27.9722	7.88
27.9861	7.88
28	7.82
28.0139	7.82
28.0278	7.82
28.0417	7.82
28.0556	7.82
28.0695	7.82
28.0833	7.88
28.0972	7.88
28.1111	7.88
28.125	7.88
28.1389	7.95
28.1528	7.95
28.1667	7.95
28.1806	7.88
28.1945	7.88
28.2083	7.88
28.2222	7.88
28.2361	7.88
28.25	7.88
28.2639	7.88
28.2778	7.95
28.2917	7.95
28.3056	7.95
28.3195	7.95
28.3333	7.88
28.3472	7.82
28.3611	7.76
28.375	7.69
28.3889	7.51
28.4028	7.44
28.4167	7.32
28.4306	7.13
28.4445	6.88
28.4583	6.69
28.4722	6.5
28.4861	6.32
28.5	6.13
28.5139	5.94
28.5278	5.69
28.5417	5.5
28.5556	5.38
28.5695	5.25
28.5833	5.13
28.5972	5
28.6111	5
28.625	5.19
28.6389	5.44
28.6528	5.81
28.6667	6.19
28.6806	6.69
28.6945	7.26
28.7083	7.88
28.7222	8.51
[truncated: 6,128 more rows]

## Sheet: 8C_AN7
0.9583	37.55
0.9722	37.17
0.9861	36.68
1	36.24
1.0139	35.74
1.0278	36.49
1.0417	36.05
1.0556	36.18
1.0695	36.68
1.0833	37.3
1.0972	36.93
1.1111	36.11
1.125	35.74
1.1389	35.61
1.1528	36.61
1.1667	36.43
1.1806	36.8
1.1945	36.55
1.2083	36.24
1.2222	36.3
1.2361	36.86
1.25	38.42
1.2639	37.3
1.2778	36.61
1.2917	35.86
1.3056	35.3
1.3195	35.05
1.3333	35.3
1.3472	35.93
1.3611	36.05
1.375	35.93
1.3889	36.24
1.4028	35.61
1.4167	35.61
1.4306	35.37
1.4445	35.43
1.4583	35.3
1.4722	36.3
1.4861	35.8
1.5	35.68
1.5139	35.3
1.5278	35.55
1.5417	35.3
1.5556	35.43
1.5695	35.3
1.5833	34.93
1.5972	34.87
1.6111	35.43
1.625	35.43
1.6389	35.61
1.6528	36.05
1.6667	36.18
1.6806	36.11
1.6945	35.68
1.7083	35.55
1.7222	36.24
1.7361	37.24
1.75	37.17
1.7639	37.3
1.7778	38.24
1.7917	37.11
1.8056	36.86
1.8195	36.43
1.8333	35.93
1.8472	35.74
1.8611	36.49
1.875	37.61
1.8889	37.92
1.9028	37.05
1.9167	36.55
1.9306	36.3
1.9445	36.24
1.9583	36.61
1.9722	37.49
1.9861	37.49
2	37.3
2.0139	36.86
2.0278	36.3
2.0417	36.11
2.0556	36.11
2.0695	36.43
2.0833	36.8
2.0972	36.36
2.1111	36.18
2.125	36.49
2.1389	38.3
2.1528	37.3
2.1667	36.3
2.1806	35.68
2.1945	35.61
2.2083	35.86
2.2222	35.8
2.2361	36.74
2.25	37.11
2.2639	36.55
2.2778	35.8
2.2917	35.37
2.3056	36.18
2.3195	36.49
2.3333	36.24
2.3472	35.93
2.3611	35.74
2.375	35.24
2.3889	34.87
2.4028	35.12
2.4167	35.49
2.4306	35.93
2.4445	35.8
2.4583	36.18
2.4722	36.49
2.4861	36.11
2.5	35.74
2.5139	36.18
2.5278	36.11
2.5417	35.93
2.5556	35.55
2.5695	35.55
2.5833	35.49
2.5972	36.55
2.6111	36.24
2.625	36.05
2.6389	36.36
2.6528	36.18
2.6667	35.68
2.6806	35.93
2.6945	35.93
2.7083	35.55
2.7222	36.18
2.7361	37.11
2.75	36.86
2.7639	37.17
2.7778	37.42
2.7917	37.36
2.8056	36.86
2.8195	36.05
2.8333	35.74
2.8472	35.68
2.8611	36.24
2.875	36.43
2.8889	37.05
2.9028	36.55
2.9167	36.18
2.9306	36.55
2.9445	37.05
2.9583	37.24
2.9722	37.74
2.9861	37.05
3	36.36
3.0139	36.18
3.0278	36.24
3.0417	36.86
3.0556	37.24
3.0695	36.86
3.0833	36.18
3.0972	35.68
3.1111	35.93
3.125	36.55
3.1389	36.43
3.1528	37.61
3.1667	37.8
3.1806	37.3
3.1945	36.74
3.2083	37.05
3.2222	36.36
3.2361	36.05
3.25	35.55
3.2639	35.37
3.2778	36.24
3.2917	35.93
3.3056	35.68
3.3195	35.43
3.3333	35.43
3.3472	35.3
3.3611	35.18
3.375	35.05
3.3889	35.61
3.4028	35.86
3.4167	35.68
3.4306	35.18
3.4445	35.49
3.4583	35.3
3.4722	35.12
3.4861	35.61
3.5	35.49
3.5139	35.24
3.5278	35.86
3.5417	35.99
3.5556	35.86
3.5695	35.37
3.5833	35.74
3.5972	35.55
3.6111	35.37
3.625	35.99
3.6389	35.86
3.6528	35.61
3.6667	35.55
3.6806	35.86
3.6945	36.05
3.7083	36.36
3.7222	36.3
3.7361	37.49
3.75	36.74
3.7639	37.24
3.7778	37.11
3.7917	36.74
3.8056	36.68
3.8195	36.05
3.8333	35.8
3.8472	35.61
3.8611	36.05
3.875	36.86
3.8889	37.61
3.9028	36.99
3.9167	36.8
3.9306	36.49
3.9445	36.68
3.9583	36.24
3.9722	36.18
3.9861	36.86
4	37.74
4.0139	37.61
4.0278	37.24
4.0417	36.55
4.0556	36.11
4.0695	35.74
4.0833	35.61
4.0972	35.49
4.1111	35.18
4.125	35.68
4.1389	36.68
4.1528	36.68
4.1667	36.24
4.1806	35.99
4.1945	36.61
4.2083	36.99
4.2222	38.24
4.2361	36.8
4.25	36.68
4.2639	36.3
4.2778	35.74
4.2917	35.3
4.3056	35.3
4.3195	35.37
4.3333	36.36
4.3472	36.18
4.3611	35.74
4.375	35.24
4.3889	35.05
4.4028	34.93
4.4167	34.74
4.4306	34.68
4.4445	35.18
4.4583	35.37
4.4722	35.49
4.4861	35.49
4.5	35.61
4.5139	35.55
4.5278	35.55
4.5417	35.49
4.5556	35.43
4.5695	34.87
4.5833	35.74
4.5972	35.37
4.6111	35.05
4.625	35.74
4.6389	35.37
4.6528	35.12
4.6667	35.18
4.6806	35.43
4.6945	35.24
4.7083	35.12
4.7222	35.24
4.7361	35.68
4.75	36.61
4.7639	37.05
4.7778	37.36
4.7917	36.74
4.8056	36.93
4.8195	36.43
4.8333	36.24
4.8472	36.3
4.8611	37.11
4.875	36.99
4.8889	37.11
4.9028	36.61
4.9167	36.3
4.9306	36.43
4.9445	36.43
4.9583	37.3
4.9722	36.8
4.9861	36.93
5	36.18
5.0139	35.86
5.0278	35.55
5.0417	35.74
5.0556	35.74
5.0695	35.61
5.0833	36.61
5.0972	36.8
5.1111	37.8
5.125	37.36
5.1389	37.11
5.1528	36.8
5.1667	36.74
5.1806	35.8
5.1945	35.49
5.2083	35.24
5.2222	35.43
5.2361	35.3
5.25	35.18
5.2639	36.05
5.2778	36.55
5.2917	36.3
5.3056	35.68
5.3195	35.3
5.3333	34.93
5.3472	34.87
5.3611	35.37
5.375	35.37
5.3889	35.8
5.4028	35.3
5.4167	35.12
5.4306	34.8
5.4445	34.8
5.4583	34.68
5.4722	34.8
5.4861	34.74
5.5	34.49
5.5139	34.74
5.5278	35.8
5.5417	35.8
5.5556	35.3
5.5695	35.24
5.5833	34.93
5.5972	35.37
5.6111	35.68
5.625	35.3
5.6389	34.99
5.6528	35.74
5.6667	35.55
5.6806	35.55
5.6945	35.93
5.7083	35.93
5.7222	35.55
5.7361	35.86
5.75	36.86
5.7639	37.74
5.7778	37.36
5.7917	36.68
5.8056	36.74
5.8195	36.18
5.8333	35.43
5.8472	35.61
5.8611	36.49
5.875	36.11
5.8889	36.68
5.9028	37.11
5.9167	36.18
5.9306	35.55
5.9445	35.3
5.9583	35.18
5.9722	36.18
5.9861	36.86
6	36.86
6.0139	36.55
6.0278	36.99
6.0417	36.74
6.0556	35.93
6.0695	35.05
6.0833	34.8
6.0972	34.68
6.1111	35.43
6.125	35.99
6.1389	35.55
6.1528	35.43
6.1667	35.68
6.1806	37.42
6.1945	37.55
6.2083	36.74
6.2222	36.05
6.2361	36.36
6.25	35.49
6.2639	34.93
6.2778	34.55
6.2917	34.3
6.3056	34.3
6.3195	34.74
6.3333	35.05
6.3472	35.68
6.3611	35.93
6.375	35.24
6.3889	34.8
6.4028	34.68
6.4167	34.43
6.4306	34.68
6.4445	34.43
6.4583	34.12
6.4722	34.43
6.4861	34.05
6.5	34.43
6.5139	34.99
6.5278	35.24
6.5417	34.87
6.5556	35.37
6.5695	35.24
6.5833	35.12
6.5972	35.18
6.6111	35.8
6.625	35.37
6.6389	34.8
6.6528	34.93
6.6667	35.37
6.6806	35.49
6.6945	35.49
6.7083	35.18
6.7222	35.37
6.7361	35.93
6.75	35.68
6.7639	35.61
6.7778	35.86
6.7917	36.86
6.8056	37.36
6.8195	37.61
6.8333	37.61
6.8472	37.42
6.8611	36.99
6.875	36.74
6.8889	36.68
6.9028	36.11
6.9167	35.55
6.9306	35.12
6.9445	36.11
6.9583	35.86
6.9722	35.86
6.9861	36.43
7	37.3
7.0139	37.11
7.0278	36.93
7.0417	36.68
7.0556	36.18
7.0695	35.3
7.0833	35.12
7.0972	34.93
7.1111	34.87
7.125	35.99
7.1389	35.8
7.1528	35.37
7.1667	34.93
7.1806	34.93
7.1945	35.18
7.2083	35.49
7.2222	37.11
7.2361	36.86
7.25	36.55
7.2639	35.61
7.2778	34.93
7.2917	34.68
7.3056	34.62
7.3195	34.93
7.3333	35.55
7.3472	35.3
7.3611	34.87
7.375	34.62
7.3889	34.55
7.4028	34.99
7.4167	35.18
7.4306	34.8
7.4445	34.74
7.4583	35.24
7.4722	35.3
7.4861	34.93
7.5	35.55
7.5139	36.24
7.5278	35.86
7.5417	35.43
7.5556	35.49
7.5695	35.12
7.5833	35.68
7.5972	36.05
7.6111	35.49
7.625	34.74
7.6389	34.62
7.6528	33.99
7.6667	34.49
7.6806	35.49
7.6945	35.3
7.7083	36.05
7.7222	36.99
7.7361	36.36
7.75	35.3
7.7639	34.8
7.7778	34.74
7.7917	35.18
7.8056	36.05
7.8195	36.8
7.8333	36.86
7.8472	36.49
7.8611	35.74
7.875	35.37
7.8889	35.93
7.9028	36.8
7.9167	36.86
7.9306	36.24
7.9445	37.61
7.9583	37.74
7.9722	37.49
7.9861	38.17
8	37.36
8.0139	36.49
8.0278	36.43
8.0417	36.24
8.0556	35.74
8.0695	35.18
8.0833	34.49
8.0972	34.37
8.1111	34.18
8.125	35.61
8.1389	35.24
8.1528	34.55
8.1667	34.43
8.1806	34.55
8.1945	34.87
8.2083	35.55
8.2222	35.3
8.2361	36.05
8.25	36.8
8.2639	36.36
8.2778	35.99
8.2917	35.05
8.3056	34.8
8.3195	34.24
8.3333	34.49
8.3472	34.62
8.3611	35.55
8.375	35.3
8.3889	34.99
8.4028	34.49
8.4167	34.24
8.4306	34.74
8.4445	34.87
8.4583	34.37
8.4722	34.43
8.4861	34.12
8.5	34.74
8.5139	35.24
8.5278	35.12
8.5417	35.24
8.5556	35.18
8.5695	35.12
8.5833	34.99
8.5972	35.18
8.6111	34.62
8.625	34.49
8.6389	34.62
8.6528	34.8
8.6667	34.68
8.6806	35.3
8.6945	35.49
8.7083	35.3
8.7222	35.24
8.7361	36.18
8.75	36.8
8.7639	37.36
8.7778	36.36
8.7917	36.18
8.8056	35.68
8.8195	35.37
8.8333	35.24
8.8472	34.99
8.8611	34.8
8.875	35.3
8.8889	36.49
8.9028	36.99
8.9167	36.8
8.9306	36.93
8.9445	36.99
8.9583	36.05
8.9722	35.49
8.9861	34.37
9	33.37
9.0139	32.18
9.0278	30.87
9.0417	29.68
9.0556	28.37
9.0695	27.12
9.0833	25.75
9.0972	24.5
9.1111	23.31
9.125	22.18
9.1389	21.5
9.1528	20.62
9.1667	19.74
9.1806	18.93
9.1945	18.18
9.2083	17.43
9.2222	16.74
9.2361	16.12
9.25	15.55
9.2639	14.99
9.2778	14.49
9.2917	14.05
9.3056	13.67
9.3195	13.3
9.3333	12.92
9.3472	12.49
9.3611	12.11
9.375	11.73
9.3889	11.36
9.4028	10.98
9.4167	10.61
9.4306	10.23
9.4445	9.86
9.4583	9.48
9.4722	9.1
9.4861	8.79
9.5	8.48
9.5139	8.16
9.5278	7.98
9.5417	7.73
9.5556	7.48
9.5695	7.35
9.5833	7.35
9.5972	7.41
9.6111	7.48
9.625	7.85
9.6389	8.54
9.6528	9.48
9.6667	10.54
9.6806	11.55
9.6945	12.55
9.7083	14.3
9.7222	18.99
9.7361	31.24
9.75	34.68
9.7639	34.93
9.7778	34.74
9.7917	34.93
9.8056	35.18
9.8195	35.37
9.8333	35.05
9.8472	34.68
9.8611	35.18
9.875	35.49
9.8889	34.93
9.9028	34.68
9.9167	34.68
9.9306	34.74
9.9445	35.55
9.9583	35.12
9.9722	35.8
9.9861	35.24
10	35.74
10.0139	35.12
10.0278	34.93
10.0417	34.8
10.0556	34.74
10.0695	34.55
10.0833	34.55
10.0972	35.37
10.1111	35.05
10.125	35.12
10.1389	35.93
10.1528	36.74
10.1667	36.99
10.1806	36.49
10.1945	36.18
10.2083	36.43
10.2222	36.43
10.2361	35.99
10.25	35.93
10.2639	35.18
10.2778	35.05
10.2917	34.99
10.3056	34.93
10.3195	34.37
10.3333	34.55
10.3472	35.74
10.3611	36.8
10.375	35.99
10.3889	35.86
10.4028	35.3
10.4167	34.8
10.4306	34.49
10.4445	34.18
10.4583	34.05
10.4722	33.99
10.4861	34.49
10.5	34.99
10.5139	35.18
10.5278	34.93
10.5417	35.24
10.5556	34.87
10.5695	34.3
10.5833	33.68
10.5972	33.87
10.6111	33.55
10.625	33.93
10.6389	33.8
10.6528	34.43
10.6667	34.99
10.6806	35.12
10.6945	34.8
10.7083	34.68
10.7222	34.49
10.7361	34.43
10.75	34.62
10.7639	35.43
10.7778	35.43
10.7917	35.18
10.8056	34.8
10.8195	34.49
10.8333	34.93
10.8472	34.68
10.8611	34.87
10.875	36.18
10.8889	36.24
10.9028	37.24
10.9167	36.68
10.9306	35.93
10.9445	35.12
10.9583	34.68
10.9722	34.43
10.9861	34.93
11	35.37
11.0139	36.55
11.0278	34.3
11.0417	32.99
11.0556	31.74
11.0695	30.37
11.0833	28.75
11.0972	27.5
11.1111	26.31
11.125	25.06
11.1389	23.87
11.1528	22.75
11.1667	21.75
11.1806	20.81
11.1945	19.87
11.2083	19.06
11.2222	18.31
11.2361	17.55
11.25	16.87
11.2639	16.24
11.2778	15.74
11.2917	15.18
11.3056	14.74
11.3195	14.3
11.3333	13.86
11.3472	13.49
11.3611	13.11
11.375	12.8
11.3889	12.49
11.4028	12.17
11.4167	11.86
11.4306	11.55
11.4445	11.36
11.4583	12.11
11.4722	14.36
11.4861	21.81
11.5	33.99
11.5139	35.68
11.5278	36.49
11.5417	36.68
11.5556	36.43
11.5695	36.36
11.5833	36.49
11.5972	35.61
11.6111	35.24
11.625	34.87
11.6389	34.99
11.6528	36.43
11.6667	35.3
11.6806	35.61
11.6945	35.68
11.7083	35.3
11.7222	35.74
11.7361	34.49
11.75	34.12
11.7639	34.05
11.7778	33.62
11.7917	34.18
11.8056	35.18
11.8195	34.74
11.8333	35.86
11.8472	36.61
11.8611	37.24
11.875	36.3
11.8889	35.99
11.9028	34.93
11.9167	34.55
11.9306	34.8
11.9445	34.93
11.9583	34.74
11.9722	34.62
11.9861	34.99
12	35.37
12.0139	36.05
12.0278	37.24
12.0417	36.99
12.0556	36.24
12.0695	36.18
12.0833	35.55
12.0972	34.99
12.1111	34.93
12.125	35.37
12.1389	35.8
12.1528	35.05
12.1667	34.43
12.1806	34.05
12.1945	33.68
12.2083	33.99
12.2222	34.49
12.2361	34.99
12.25	35.43
12.2639	35.05
12.2778	34.8
12.2917	34.87
12.3056	34.8
12.3195	34.93
12.3333	35.24
12.3472	35.55
12.3611	35.68
12.375	35.05
12.3889	34.55
12.4028	34.49
12.4167	34.55
12.4306	36.61
12.4445	36.24
12.4583	36.3
12.4722	36.74
12.4861	35.61
12.5	34.99
12.5139	34.55
12.5278	34.37
12.5417	34.55
12.5556	34.24
12.5695	35.18
12.5833	35.05
12.5972	35.68
12.6111	35.3
12.625	35.3
12.6389	36.61
12.6528	36.86
12.6667	37.11
12.6806	36.43
12.6945	36.05
12.7083	35.55
12.7222	34.74
12.7361	34.62
12.75	35.12
12.7639	35.12
12.7778	34.62
12.7917	35.18
12.8056	36.86
12.8195	36.43
12.8333	36.86
12.8472	35.93
12.8611	35.55
12.875	35.3
12.8889	34.93
12.9028	35.05
12.9167	35.74
12.9306	35.3
12.9445	35.05
12.9583	35.43
12.9722	36.55
12.9861	36.18
13	37.17
13.0139	37.24
13.0278	36.86
13.0417	36.74
13.0556	36.36
13.0695	35.68
13.0833	35.18
13.0972	34.99
13.1111	34.99
13.125	35.74
13.1389	35.68
13.1528	35.43
13.1667	35.74
13.1806	36.99
13.1945	36.8
13.2083	36.49
13.2222	35.61
13.2361	34.93
13.25	34.68
13.2639	34.55
13.2778	34.55
13.2917	34.8
13.3056	35.8
13.3195	35.61
13.3333	35.86
13.3472	35.24
13.3611	34.93
13.375	34.68
13.3889	34.49
13.4028	34.12
13.4167	34.99
13.4306	34.55
13.4445	35.3
13.4583	35.3
13.4722	34.93
13.4861	34.87
13.5	34.8
13.5139	35.55
13.5278	35.12
13.5417	34.8
13.5556	34.68
13.5695	34.3
13.5833	34.05
13.5972	35.12
13.6111	35.43
13.625	35.24
13.6389	34.87
13.6528	34.8
13.6667	35.05
13.6806	35.43
13.6945	34.99
13.7083	34.93
13.7222	35.74
13.7361	35.86
13.75	37.11
13.7639	36.8
13.7778	36.49
13.7917	35.74
13.8056	35.24
13.8195	34.93
13.8333	35.74
13.8472	35.61
13.8611	35.99
13.875	36.3
13.8889	36.11
13.9028	37.42
13.9167	37.49
13.9306	37.24
13.9445	36.93
13.9583	36.3
13.9722	35.49
13.9861	35.43
14	36.43
14.0139	35.99
14.0278	36.99
14.0417	37.11
14.0556	36.36
14.0695	36.18
14.0833	35.61
14.0972	33.49
14.1111	31.56
14.125	29.68
14.1389	28.25
14.1528	26.56
14.1667	24.93
14.1806	23.5
14.1945	22.12
14.2083	20.87
14.2222	19.74
14.2361	18.68
14.25	17.74
14.2639	16.93
14.2778	16.12
14.2917	15.36
14.3056	14.74
14.3195	14.11
14.3333	13.55
14.3472	12.99
14.3611	12.49
14.375	11.98
14.3889	11.48
14.4028	10.98
14.4167	10.61
14.4306	10.17
14.4445	9.73
14.4583	9.35
14.4722	9.04
14.4861	8.73
14.5	8.48
14.5139	8.23
14.5278	7.98
14.5417	7.73
14.5556	7.6
14.5695	7.35
14.5833	7.16
14.5972	7.1
14.6111	6.91
14.625	6.72
14.6389	6.66
14.6528	6.6
14.6667	6.54
14.6806	6.47
14.6945	6.54
14.7083	6.47
14.7222	6.47
14.7361	6.41
14.75	6.35
14.7639	6.35
14.7778	6.41
14.7917	6.41
14.8056	6.47
14.8195	6.54
14.8333	6.6
14.8472	6.66
14.8611	6.79
14.875	6.85
14.8889	6.91
14.9028	6.91
14.9167	6.97
14.9306	7.1
14.9445	7.1
14.9583	7.16
14.9722	7.22
14.9861	7.29
15	7.41
15.0139	7.41
15.0278	7.48
15.0417	7.6
15.0556	7.6
15.0695	7.6
15.0833	7.66
15.0972	7.73
15.1111	7.73
15.125	7.73
15.1389	7.79
15.1528	7.79
15.1667	7.85
15.1806	7.91
15.1945	7.91
15.2083	7.98
15.2222	7.98
15.2361	7.98
15.25	8.04
15.2639	8.04
15.2778	8.04
15.2917	8.1
15.3056	8.1
15.3195	8.16
15.3333	8.16
15.3472	8.16
15.3611	8.23
15.375	8.23
15.3889	8.23
15.4028	8.1
15.4167	8.04
15.4306	8.04
15.4445	7.91
15.4583	7.85
15.4722	7.85
15.4861	7.66
15.5	7.6
15.5139	7.48
15.5278	7.35
15.5417	7.22
15.5556	7.16
15.5695	7.04
15.5833	6.91
15.5972	6.85
15.6111	6.85
15.625	6.85
15.6389	6.72
15.6528	6.6
15.6667	6.6
15.6806	6.6
15.6945	6.6
15.7083	6.54
15.7222	6.47
15.7361	6.35
15.75	6.28
15.7639	6.28
15.7778	6.35
15.7917	6.35
15.8056	6.28
15.8195	6.35
15.8333	6.41
15.8472	6.47
15.8611	6.54
15.875	6.66
15.8889	6.66
15.9028	6.66
15.9167	6.72
15.9306	6.85
15.9445	6.91
15.9583	6.97
15.9722	7.1
15.9861	7.16
16	7.22
16.0139	7.29
16.0278	7.35
16.0417	7.41
16.0556	7.41
16.0695	7.41
16.0833	7.48
16.0972	7.54
16.1111	7.54
16.125	7.6
16.1389	7.6
16.1528	7.66
16.1667	7.73
16.1806	7.73
16.1945	7.79
16.2083	7.85
16.2222	7.79
16.2361	7.79
16.25	7.79
16.2639	7.79
16.2778	7.79
16.2917	7.79
16.3056	7.85
16.3195	7.79
16.3333	7.85
16.3472	7.79
16.3611	7.85
16.375	7.85
16.3889	7.79
16.4028	7.66
16.4167	7.54
16.4306	7.54
16.4445	7.79
16.4583	8.29
16.4722	9.1
16.4861	10.36
16.5	12.36
16.5139	17.05
16.5278	27.18
16.5417	33.68
16.5556	35.49
16.5695	35.3
16.5833	35.74
16.5972	35.49
16.6111	35.24
16.625	36.36
16.6389	36.18
16.6528	35.12
16.6667	35.12
16.6806	34.74
16.6945	34.37
16.7083	35.37
16.7222	36.05
16.7361	35.68
16.75	35.3
16.7639	35.61
16.7778	35.55
16.7917	36.68
16.8056	36.43
16.8195	35.74
16.8333	35.61
16.8472	35.3
16.8611	35.68
16.875	36.18
16.8889	35.43
16.9028	35.43
16.9167	35.18
16.9306	34.8
16.9445	35.8
16.9583	36.49
16.9722	35.68
16.9861	35.24
17	35.3
17.0139	35.74
17.0278	36.36
17.0417	37.05
17.0556	37.55
17.0695	36.99
17.0833	36.93
17.0972	36.68
17.1111	36.55
17.125	36.49
17.1389	36.11
17.1528	35.68
17.1667	35.37
17.1806	35.24
17.1945	35.18
17.2083	35.05
17.2222	35.05
17.2361	35.55
17.25	35.37
17.2639	34.68
17.2778	35.3
17.2917	35.68
17.3056	35.3
17.3195	35.37
17.3333	35.49
17.3472	35.99
17.3611	35.61
17.375	36.05
17.3889	36.11
17.4028	35.18
17.4167	35.24
17.4306	34.93
17.4445	35.12
17.4583	35.49
17.4722	34.8
17.4861	35.18
17.5	34.8
17.5139	35.12
17.5278	34.62
17.5417	34.74
17.5556	35.8
17.5695	35.86
17.5833	35.12
17.5972	34.74
17.6111	34.87
17.625	35.8
17.6389	35.12
17.6528	34.62
17.6667	35.3
17.6806	36.3
17.6945	35.86
17.7083	35.24
17.7222	34.74
17.7361	34.74
17.75	35.61
17.7639	35.43
17.7778	36.24
17.7917	37.61
17.8056	36.99
17.8195	36.86
17.8333	37.05
17.8472	36.05
17.8611	34.93
17.875	36.43
17.8889	35.8
17.9028	33.06
17.9167	31.24
17.9306	29.18
17.9445	27.62
17.9583	26.31
17.9722	24.5
17.9861	22.93
18	21.43
18.0139	20.12
18.0278	18.87
18.0417	17.74
18.0556	16.68
18.0695	15.8
18.0833	15.05
18.0972	14.3
18.1111	13.67
18.125	13.11
18.1389	12.61
18.1528	12.17
18.1667	11.73
18.1806	11.36
18.1945	11.05
18.2083	10.67
18.2222	10.36
18.2361	10.11
18.25	9.92
18.2639	9.73
18.2778	9.54
18.2917	9.35
18.3056	9.23
18.3195	9.1
18.3333	8.98
18.3472	8.79
18.3611	8.6
18.375	8.41
18.3889	8.16
18.4028	7.91
18.4167	7.73
18.4306	7.6
18.4445	7.41
18.4583	7.22
18.4722	7.1
18.4861	6.97
18.5	6.91
18.5139	6.72
18.5278	6.6
18.5417	6.47
18.5556	6.28
18.5695	6.22
18.5833	6.16
18.5972	6.1
18.6111	6.03
18.625	5.91
18.6389	5.85
18.6528	5.91
18.6667	5.91
18.6806	5.97
18.6945	6.1
18.7083	6.1
18.7222	6.1
18.7361	6.16
18.75	6.28
18.7639	6.35
18.7778	6.47
18.7917	6.54
18.8056	6.66
18.8195	6.79
18.8333	6.91
18.8472	6.97
18.8611	7.04
18.875	7.16
18.8889	7.22
18.9028	7.29
18.9167	7.35
18.9306	7.41
18.9445	7.48
18.9583	7.54
18.9722	7.66
18.9861	7.66
19	7.73
19.0139	7.73
19.0278	7.79
19.0417	7.73
19.0556	7.79
19.0695	7.79
19.0833	7.79
19.0972	7.85
19.1111	7.85
19.125	7.85
19.1389	7.91
19.1528	7.91
19.1667	7.98
19.1806	8.04
19.1945	8.04
19.2083	7.98
19.2222	7.98
19.2361	7.98
19.25	8.04
19.2639	8.04
19.2778	8.04
19.2917	8.1
19.3056	8.1
19.3195	8.1
19.3333	8.04
19.3472	8.04
19.3611	8.04
19.375	7.91
19.3889	7.73
19.4028	7.66
19.4167	7.54
19.4306	7.29
19.4445	7.16
19.4583	7.1
19.4722	6.91
19.4861	6.72
19.5	6.66
19.5139	6.54
19.5278	6.41
19.5417	6.28
19.5556	6.1
19.5695	5.91
19.5833	5.78
19.5972	5.66
19.6111	5.66
19.625	5.53
19.6389	5.47
19.6528	5.53
19.6667	5.66
19.6806	5.66
19.6945	5.66
19.7083	5.66
19.7222	5.6
19.7361	5.66
19.75	5.72
19.7639	5.78
19.7778	5.78
19.7917	5.85
19.8056	5.97
19.8195	5.97
19.8333	6.1
19.8472	6.22
19.8611	6.28
19.875	6.35
19.8889	6.41
19.9028	6.54
19.9167	6.6
19.9306	6.72
19.9445	6.85
19.9583	6.91
19.9722	6.97
19.9861	7.1
20	7.16
20.0139	7.29
20.0278	7.35
20.0417	7.35
20.0556	7.41
20.0695	7.54
20.0833	7.54
20.0972	7.6
20.1111	7.6
20.125	7.66
20.1389	7.66
20.1528	7.66
20.1667	7.73
20.1806	7.73
20.1945	7.73
20.2083	7.73
20.2222	7.79
20.2361	7.85
20.25	7.85
20.2639	7.91
20.2778	7.91
20.2917	7.91
20.3056	7.98
20.3195	7.98
20.3333	7.98
20.3472	7.98
20.3611	7.98
20.375	7.98
20.3889	8.04
20.4028	8.04
20.4167	7.98
20.4306	8.04
20.4445	8.04
20.4583	8.04
20.4722	8.1
20.4861	8.04
20.5	8.04
20.5139	8.04
20.5278	8.04
20.5417	7.91
20.5556	7.85
20.5695	7.79
20.5833	7.85
20.5972	7.79
20.6111	7.79
20.625	7.73
20.6389	7.66
20.6528	7.73
20.6667	7.73
20.6806	7.73
20.6945	7.73
20.7083	7.66
20.7222	7.66
20.7361	7.73
20.75	7.79
20.7639	7.79
20.7778	7.85
20.7917	7.91
20.8056	7.91
20.8195	7.98
20.8333	8.04
20.8472	8.04
20.8611	8.35
20.875	8.79
20.8889	9.54
20.9028	10.61
20.9167	11.67
20.9306	13.8
20.9445	19.37
20.9583	30.56
20.9722	34.87
20.9861	35.68
21	35.43
21.0139	35.43
21.0278	35.86
21.0417	36.49
21.0556	36.3
21.0695	36.18
21.0833	36.11
21.0972	35.55
21.1111	35.8
21.125	36.05
21.1389	35.93
21.1528	36.18
21.1667	35.86
21.1806	35.43
21.1945	34.99
21.2083	35.37
21.2222	36.24
21.2361	35.68
21.25	36.3
21.2639	36.05
21.2778	36.11
21.2917	35.93
21.3056	35.8
21.3195	36.61
21.3333	36.74
21.3472	36.61
21.3611	37.05
21.375	36.8
21.3889	36.11
21.4028	35.8
21.4167	35.74
21.4306	35.86
21.4445	35.99
21.4583	35.61
21.4722	35.37
21.4861	35.12
21.5	35.24
21.5139	35.74
21.5278	36.86
21.5417	37.17
21.5556	36.8
21.5695	37.11
21.5833	36.24
21.5972	34.62
21.6111	33.55
21.625	32.06
21.6389	30.18
21.6528	28.37
21.6667	27.18
21.6806	25.56
21.6945	23.87
21.7083	22.31
21.7222	21
21.7361	19.81
21.75	18.74
21.7639	17.74
21.7778	16.8
21.7917	15.99
21.8056	15.3
21.8195	14.61
21.8333	13.99
21.8472	13.49
21.8611	12.99
21.875	12.55
21.8889	12.17
21.9028	11.8
21.9167	11.48
21.9306	11.23
21.9445	10.98
21.9583	10.73
21.9722	10.54
21.9861	10.42
22	10.23
22.0139	10.11
22.0278	9.98
22.0417	9.79
22.0556	9.73
22.0695	9.67
22.0833	9.54
22.0972	9.48
22.1111	9.42
22.125	9.35
22.1389	9.29
22.1528	9.23
22.1667	9.23
22.1806	9.17
22.1945	9.1
22.2083	9.04
22.2222	9.04
22.2361	8.98
22.25	8.92
22.2639	8.98
22.2778	8.92
22.2917	8.85
22.3056	8.85
22.3195	8.85
22.3333	8.79
22.3472	8.79
22.3611	8.73
22.375	8.67
22.3889	8.67
22.4028	8.6
22.4167	8.54
22.4306	8.6
22.4445	8.48
22.4583	8.48
22.4722	8.41
22.4861	8.35
22.5	8.35
22.5139	8.29
22.5278	8.23
22.5417	8.23
22.5556	8.16
22.5695	8.1
22.5833	8.1
22.5972	7.98
22.6111	7.91
22.625	7.91
22.6389	7.73
22.6528	7.6
22.6667	7.48
22.6806	7.35
22.6945	7.22
22.7083	6.97
22.7222	6.72
22.7361	6.47
22.75	6.28
22.7639	6.16
22.7778	5.97
22.7917	5.72
22.8056	5.53
22.8195	5.41
22.8333	5.22
22.8472	5.22
22.8611	5.09
22.875	5.03
22.8889	5.09
22.9028	5.09
22.9167	5.09
22.9306	5.16
22.9445	5.22
22.9583	5.28
22.9722	5.34
22.9861	5.53
23	5.6
23.0139	5.72
23.0278	5.78
23.0417	5.85
23.0556	6.03
23.0695	6.16
23.0833	6.28
23.0972	6.41
23.1111	6.6
23.125	6.72
23.1389	6.85
23.1528	6.97
23.1667	7.04
23.1806	7.16
23.1945	7.22
23.2083	7.29
23.2222	7.41
23.2361	7.41
23.25	7.48
23.2639	7.54
23.2778	7.54
23.2917	7.66
23.3056	7.66
23.3195	7.73
23.3333	7.73
23.3472	7.66
23.3611	7.6
23.375	7.41
23.3889	7.41
23.4028	7.35
23.4167	7.16
23.4306	7.16
23.4445	7.04
23.4583	6.97
23.4722	6.85
23.4861	6.66
23.5	6.47
23.5139	6.35
23.5278	6.28
23.5417	6.1
23.5556	5.91
23.5695	5.78
23.5833	5.72
23.5972	5.66
23.6111	5.53
23.625	5.47
23.6389	5.53
23.6528	5.47
23.6667	5.41
23.6806	5.41
23.6945	5.47
23.7083	5.34
23.7222	5.28
23.7361	5.34
23.75	5.34
23.7639	5.28
23.7778	5.28
23.7917	5.34
23.8056	5.34
23.8195	5.34
23.8333	5.41
23.8472	5.47
23.8611	5.47
23.875	5.47
23.8889	5.53
23.9028	5.66
23.9167	5.66
23.9306	5.78
23.9445	5.91
23.9583	5.91
23.9722	6.03
23.9861	6.1
24	6.16
24.0139	6.28
24.0278	6.28
24.0417	6.35
24.0556	6.41
24.0695	6.47
24.0833	6.54
24.0972	6.6
24.1111	6.66
24.125	6.72
24.1389	6.79
24.1528	6.85
24.1667	6.91
24.1806	6.97
24.1945	6.91
24.2083	6.97
24.2222	6.97
24.2361	6.97
24.25	7.04
24.2639	7.04
24.2778	7.04
24.2917	7.04
24.3056	7.04
24.3195	7.04
24.3333	6.97
24.3472	6.91
24.3611	6.79
24.375	6.6
24.3889	6.47
24.4028	6.35
24.4167	6.22
24.4306	6.03
24.4445	5.91
24.4583	5.85
24.4722	5.72
24.4861	5.6
24.5	5.53
24.5139	5.53
24.5278	5.47
24.5417	5.34
24.5556	5.28
24.5695	5.34
24.5833	5.34
24.5972	5.28
24.6111	5.22
24.625	5.34
24.6389	5.41
24.6528	5.41
24.6667	5.53
24.6806	5.66
24.6945	5.66
24.7083	5.72
24.7222	5.91
24.7361	5.97
24.75	5.97
24.7639	6.1
24.7778	6.1
24.7917	6.1
24.8056	6.16
24.8195	6.28
24.8333	6.35
24.8472	6.35
24.8611	6.35
24.875	6.41
24.8889	6.47
24.9028	6.54
24.9167	6.6
24.9306	6.66
24.9445	6.72
24.9583	6.85
24.9722	6.91
24.9861	6.97
25	7.1
25.0139	7.1
25.0278	7.1
25.0417	7.22
25.0556	7.41
25.0695	7.79
25.0833	8.41
25.0972	9.17
25.1111	10.04
25.125	10.92
25.1389	11.92
25.1528	14.3
25.1667	22.5
25.1806	32.12
25.1945	35.55
25.2083	35.68
25.2222	36.05
25.2361	35.8
25.25	35.86
25.2639	36.43
25.2778	36.43
25.2917	36.36
25.3056	36.11
25.3195	35.55
25.3333	36.3
25.3472	35.86
25.3611	36.18
25.375	36.24
25.3889	36.55
25.4028	36.3
25.4167	35.99
25.4306	35.43
25.4445	35.74
25.4583	36.24
25.4722	36.36
25.4861	36.61
25.5	36.74
25.5139	36.11
25.5278	35.24
25.5417	35.8
25.5556	35.74
25.5695	35.61
25.5833	35.3
25.5972	36.49
25.6111	36.99
25.625	36.68
25.6389	36.49
25.6528	36.61
25.6667	36.11
25.6806	35.49
25.6945	35.55
25.7083	35.37
25.7222	35.24
25.7361	35.49
25.75	36.49
25.7639	36.68
25.7778	36.68
25.7917	36.24
25.8056	35.8
25.8195	35.24
25.8333	35.24
25.8472	35.49
25.8611	36.43
25.875	36.3
25.8889	35.99
25.9028	35.43
25.9167	34.93
25.9306	35.49
25.9445	35.74
25.9583	35.86
25.9722	35.55
25.9861	35.61
26	35.74
26.0139	36.99
26.0278	37.3
26.0417	36.3
26.0556	35.8
26.0695	35.12
26.0833	35.8
26.0972	35.55
26.1111	35.93
26.125	36.86
26.1389	35.43
26.1528	33.87
26.1667	33.06
26.1806	31.74
26.1945	30.06
26.2083	28.43
26.2222	26.62
26.2361	25.06
26.25	23.56
26.2639	22.25
26.2778	21
26.2917	19.87
26.3056	18.81
26.3195	17.81
26.3333	16.93
26.3472	15.99
26.3611	15.18
26.375	14.49
26.3889	13.74
26.4028	13.11
26.4167	12.49
26.4306	11.98
26.4445	11.48
26.4583	10.92
26.4722	10.48
26.4861	10.17
26.5	9.79
26.5139	9.42
26.5278	9.1
26.5417	8.92
26.5556	8.79
26.5695	8.54
26.5833	8.35
26.5972	8.23
26.6111	8.04
26.625	7.91
26.6389	7.85
26.6528	7.79
26.6667	7.73
26.6806	7.6
26.6945	7.54
26.7083	7.54
26.7222	7.48
26.7361	7.54
26.75	7.66
26.7639	7.66
26.7778	7.73
26.7917	7.79
26.8056	7.85
26.8195	7.85
26.8333	7.91
26.8472	7.85
26.8611	7.91
26.875	7.98
26.8889	7.98
26.9028	7.98
26.9167	8.04
26.9306	8.1
26.9445	8.1
26.9583	8.16
26.9722	8.16
26.9861	8.16
27	8.23
27.0139	8.16
27.0278	8.23
27.0417	8.29
27.0556	8.29
27.0695	8.29
27.0833	8.35
27.0972	8.35
27.1111	8.35
27.125	8.35
27.1389	8.41
27.1528	8.41
27.1667	8.41
27.1806	8.41
27.1945	8.41
27.2083	8.41
27.2222	8.48
27.2361	8.41
27.25	8.41
27.2639	8.48
27.2778	8.48
27.2917	8.48
27.3056	8.48
27.3195	8.41
27.3333	8.41
27.3472	8.35
27.3611	8.35
27.375	8.35
27.3889	8.23
27.4028	8.23
27.4167	8.16
27.4306	8.04
27.4445	8.04
27.4583	7.91
27.4722	7.79
27.4861	7.79
27.5	7.66
27.5139	7.6
27.5278	7.6
27.5417	7.6
27.5556	7.48
27.5695	7.48
27.5833	7.48
27.5972	7.41
27.6111	7.41
27.625	7.29
27.6389	7.22
27.6528	7.16
27.6667	7.1
27.6806	6.97
27.6945	6.85
27.7083	6.79
27.7222	6.79
27.7361	6.72
27.75	6.66
27.7639	6.72
27.7778	6.66
27.7917	6.6
27.8056	6.66
27.8195	6.72
27.8333	6.72
27.8472	6.66
27.8611	6.72
27.875	6.79
27.8889	6.79
27.9028	6.79
27.9167	6.85
27.9306	6.85
27.9445	6.91
27.9583	6.97
27.9722	6.97
27.9861	7.04
28	7.04
28.0139	7.1
28.0278	7.16
28.0417	7.16
28.0556	7.22
28.0695	7.29
28.0833	7.29
28.0972	7.35
28.1111	7.41
28.125	7.41
28.1389	7.48
28.1528	7.54
28.1667	7.54
28.1806	7.48
28.1945	7.54
28.2083	7.54
28.2222	7.54
28.2361	7.6
28.25	7.6
28.2639	7.6
28.2778	7.66
28.2917	7.6
28.3056	7.66
28.3195	7.6
28.3333	7.54
28.3472	7.48
28.3611	7.48
28.375	7.41
28.3889	7.29
28.4028	7.22
28.4167	7.04
28.4306	6.85
28.4445	6.66
28.4583	6.54
28.4722	6.35
28.4861	6.16
28.5	6.03
28.5139	5.85
28.5278	5.6
28.5417	5.41
28.5556	5.34
28.5695	5.22
28.5833	5.09
28.5972	4.97
28.6111	4.91
28.625	4.91
28.6389	4.84
28.6528	4.78
28.6667	4.72
28.6806	4.66
28.6945	4.66
28.7083	4.72
28.7222	4.72
[truncated: 6,128 more rows]

## Sheet: 8C_AN8
0.9583	35.85
0.9722	36.91
0.9861	37.47
1	36.79
1.0139	37.72
1.0278	36.72
1.0417	36.23
1.0556	35.98
1.0695	36.1
1.0833	36.41
1.0972	36.79
1.1111	36.48
1.125	35.85
1.1389	35.73
1.1528	36.91
1.1667	36.48
1.1806	37.22
1.1945	36.85
1.2083	37.47
1.2222	37.47
1.2361	36.6
1.25	36.79
1.2639	36.72
1.2778	35.85
1.2917	35.42
1.3056	35.85
1.3195	35.85
1.3333	36.16
1.3472	36.16
1.3611	35.85
1.375	35.79
1.3889	35.23
1.4028	35.23
1.4167	35.67
1.4306	35.42
1.4445	35.17
1.4583	34.73
1.4722	34.79
1.4861	35.48
1.5	35.35
1.5139	35.35
1.5278	35.29
1.5417	35.85
1.5556	35.35
1.5695	35.04
1.5833	34.85
1.5972	35.23
1.6111	35.23
1.625	36.04
1.6389	36.6
1.6528	35.98
1.6667	35.91
1.6806	35.79
1.6945	35.91
1.7083	35.29
1.7222	35.98
1.7361	36.29
1.75	36.72
1.7639	35.91
1.7778	36.48
1.7917	37.47
1.8056	36.79
1.8195	36.6
1.8333	36.16
1.8472	36.04
1.8611	35.67
1.875	35.6
1.8889	35.6
1.9028	36.29
1.9167	36.04
1.9306	35.67
1.9445	35.85
1.9583	36.41
1.9722	36.97
1.9861	37.72
2	37.97
2.0139	36.48
2.0278	36.6
2.0417	36.1
2.0556	35.79
2.0695	35.67
2.0833	35.04
2.0972	36.16
2.1111	36.6
2.125	36.16
2.1389	36.16
2.1528	36.1
2.1667	36.29
2.1806	36.85
2.1945	37.35
2.2083	37.72
2.2222	36.72
2.2361	36.85
2.25	36.16
2.2639	35.85
2.2778	36.35
2.2917	36.35
2.3056	36.1
2.3195	36.23
2.3333	36.23
2.3472	35.6
2.3611	35.17
2.375	34.61
2.3889	34.42
2.4028	35.23
2.4167	35.48
2.4306	35.79
2.4445	35.29
2.4583	35.04
2.4722	34.79
2.4861	35.04
2.5	34.92
2.5139	34.79
2.5278	35.79
2.5417	35.35
2.5556	35.67
2.5695	35.48
2.5833	35.73
2.5972	35.54
2.6111	35.67
2.625	35.48
2.6389	35.29
2.6528	35.17
2.6667	35.42
2.6806	34.67
2.6945	35.98
2.7083	35.79
2.7222	35.73
2.7361	36.41
2.75	36.54
2.7639	36.97
2.7778	36.72
2.7917	36.66
2.8056	36.16
2.8195	35.79
2.8333	35.67
2.8472	35.91
2.8611	36.16
2.875	36.72
2.8889	36.54
2.9028	35.98
2.9167	35.85
2.9306	35.73
2.9445	36.29
2.9583	36.54
2.9722	36.23
2.9861	36.35
3	36.85
3.0139	37.41
3.0278	37.53
3.0417	36.97
3.0556	36.85
3.0695	36.6
3.0833	36.23
3.0972	36.16
3.1111	35.98
3.125	36.35
3.1389	36.91
3.1528	36.85
3.1667	36.91
3.1806	36.91
3.1945	36.66
3.2083	36.48
3.2222	36.66
3.2361	37.35
3.25	37.41
3.2639	37.04
3.2778	36.91
3.2917	36.41
3.3056	36.41
3.3195	35.6
3.3333	35.79
3.3472	35.6
3.3611	35.23
3.375	35.04
3.3889	34.92
3.4028	34.98
3.4167	35.42
3.4306	34.67
3.4445	34.67
3.4583	34.98
3.4722	34.42
3.4861	34.79
3.5	35.6
3.5139	35.67
3.5278	35.35
3.5417	35.6
3.5556	35.42
3.5695	35.48
3.5833	36.29
3.5972	36.04
3.6111	35.98
3.625	35.67
3.6389	35.79
3.6528	35.79
3.6667	35.73
3.6806	35.42
3.6945	35.98
3.7083	35.73
3.7222	35.6
3.7361	35.91
3.75	36.48
3.7639	36.35
3.7778	36.29
3.7917	37.66
3.8056	37.28
3.8195	36.29
3.8333	35.73
3.8472	35.85
3.8611	36.04
3.875	36.6
3.8889	36.66
3.9028	36.79
3.9167	36.23
3.9306	35.98
3.9445	35.6
3.9583	36.66
3.9722	36.6
3.9861	36.35
4	37.04
4.0139	36.91
4.0278	36.35
4.0417	36.72
4.0556	36.97
4.0695	36.41
4.0833	36.1
4.0972	36.23
4.1111	36.16
4.125	36.23
4.1389	35.98
4.1528	36.54
4.1667	36.41
4.1806	36.1
4.1945	35.91
4.2083	36.85
4.2222	37.28
4.2361	37.53
4.25	36.97
4.2639	36.85
4.2778	36.41
4.2917	36.16
4.3056	36.6
4.3195	36.1
4.3333	36.35
4.3472	35.42
4.3611	34.85
4.375	34.42
4.3889	35.17
4.4028	35.04
4.4167	35.35
4.4306	34.67
4.4445	35.67
4.4583	35.35
4.4722	35.23
4.4861	35.1
4.5	35.91
4.5139	35.48
4.5278	35.04
4.5417	34.98
4.5556	34.98
4.5695	34.92
4.5833	35.04
4.5972	35.91
4.6111	35.42
4.625	35.42
4.6389	35.6
4.6528	35.85
4.6667	35.42
4.6806	35.54
4.6945	35.79
4.7083	36.16
4.7222	36.1
4.7361	35.98
4.75	36.66
4.7639	36.16
4.7778	36.23
4.7917	37.28
4.8056	37.47
4.8195	36.91
4.8333	36.04
4.8472	35.73
4.8611	36.29
4.875	36.41
4.8889	37.35
4.9028	37.04
4.9167	37.53
4.9306	37.22
4.9445	35.6
4.9583	35.35
4.9722	34.98
4.9861	35.54
5	35.98
5.0139	35.67
5.0278	35.35
5.0417	35.35
5.0556	35.67
5.0695	36.1
5.0833	35.98
5.0972	35.91
5.1111	35.85
5.125	36.48
5.1389	37.16
5.1528	36.54
5.1667	35.91
5.1806	35.54
5.1945	35.85
5.2083	36.23
5.2222	35.67
5.2361	36.41
5.25	36.66
5.2639	37.6
5.2778	38.03
5.2917	36.72
5.3056	36.35
5.3195	36.04
5.3333	35.98
5.3472	35.67
5.3611	35.04
5.375	36.29
5.3889	35.79
5.4028	35.54
5.4167	35.79
5.4306	35.35
5.4445	35.35
5.4583	35.73
5.4722	35.35
5.4861	35.73
5.5	35.35
5.5139	35.35
5.5278	35.1
5.5417	35.04
5.5556	35.42
5.5695	35.85
5.5833	35.67
5.5972	35.85
5.6111	35.73
5.625	35.73
5.6389	35.79
5.6528	35.48
5.6667	36.1
5.6806	36.16
5.6945	35.85
5.7083	36.29
5.7222	36.04
5.7361	36.29
5.75	36.48
5.7639	37.41
5.7778	37.1
5.7917	35.91
5.8056	34.98
5.8195	34.92
5.8333	36.91
5.8472	36.85
5.8611	36.85
5.875	37.1
5.8889	36.35
5.9028	35.54
5.9167	35.17
5.9306	34.92
5.9445	36.29
5.9583	36.29
5.9722	36.29
5.9861	35.23
6	35.04
6.0139	35.04
6.0278	35.23
6.0417	36.72
6.0556	36.85
6.0695	36.97
6.0833	36.04
6.0972	35.91
6.1111	35.85
6.125	36.35
6.1389	37.22
6.1528	37.22
6.1667	36.48
6.1806	36.54
6.1945	35.79
6.2083	35.42
6.2222	34.61
6.2361	35.23
6.25	35.54
6.2639	35.04
6.2778	35.23
6.2917	35.73
6.3056	35.67
6.3195	35.85
6.3333	35.1
6.3472	35.1
6.3611	35.29
6.375	35.23
6.3889	35.1
6.4028	34.79
6.4167	34.67
6.4306	35.6
6.4445	35.17
6.4583	34.73
6.4722	34.85
6.4861	34.73
6.5	35.1
6.5139	35.23
6.5278	35.23
6.5417	35.04
6.5556	35.17
6.5695	35.1
6.5833	36.04
6.5972	35.67
6.6111	35.73
6.625	35.1
6.6389	34.98
6.6528	34.85
6.6667	35.79
6.6806	35.35
6.6945	34.98
6.7083	34.92
6.7222	34.79
6.7361	35.91
6.75	35.35
6.7639	35.35
6.7778	36.1
6.7917	36.1
6.8056	35.67
6.8195	36.23
6.8333	35.42
6.8472	35.1
6.8611	35.17
6.875	35.91
6.8889	36.6
6.9028	35.73
6.9167	35.73
6.9306	35.67
6.9445	35.73
6.9583	35.98
6.9722	36.54
6.9861	37.72
7	36.54
7.0139	36.54
7.0278	36.16
7.0417	35.91
7.0556	35.54
7.0695	35.35
7.0833	35.35
7.0972	36.23
7.1111	36.35
7.125	35.6
7.1389	35.48
7.1528	35.29
7.1667	36.04
7.1806	35.79
7.1945	35.91
7.2083	36.1
7.2222	36.48
7.2361	36.54
7.25	37.66
7.2639	37.28
7.2778	35.73
7.2917	36.48
7.3056	35.91
7.3195	35.04
7.3333	35.1
7.3472	34.98
7.3611	34.61
7.375	34.98
7.3889	35.42
7.4028	34.48
7.4167	34.23
7.4306	34.29
7.4445	34.79
7.4583	34.92
7.4722	34.73
7.4861	34.61
7.5	34.36
7.5139	35.35
7.5278	35.35
7.5417	35.04
7.5556	34.73
7.5695	35.04
7.5833	34.79
7.5972	34.98
7.6111	35.04
7.625	34.48
7.6389	34.54
7.6528	34.73
7.6667	36.23
7.6806	35.79
7.6945	35.73
7.7083	35.29
7.7222	35.29
7.7361	35.04
7.75	35.1
7.7639	35.67
7.7778	36.6
7.7917	36.29
7.8056	35.98
7.8195	35.04
7.8333	34.61
7.8472	34.48
7.8611	35.29
7.875	34.98
7.8889	36.23
7.9028	35.79
7.9167	35.79
7.9306	36.91
7.9445	37.1
7.9583	37.22
7.9722	36.97
7.9861	36.79
8	36.6
8.0139	36.1
8.0278	35.6
8.0417	36.66
8.0556	36.48
8.0695	36.16
8.0833	36.54
8.0972	36.04
8.1111	35.29
8.125	35.17
8.1389	35.54
8.1528	35.98
8.1667	35.67
8.1806	35.1
8.1945	35.42
8.2083	36.04
8.2222	35.73
8.2361	35.67
8.25	37.04
8.2639	37.1
8.2778	36.97
8.2917	36.41
8.3056	35.85
8.3195	35.1
8.3333	34.67
8.3472	34.85
8.3611	34.42
8.375	35.35
8.3889	34.85
8.4028	34.73
8.4167	34.36
8.4306	35.23
8.4445	34.73
8.4583	34.42
8.4722	34.92
8.4861	34.98
8.5	35.04
8.5139	34.54
8.5278	34.11
8.5417	34.42
8.5556	35.35
8.5695	35.73
8.5833	35.42
8.5972	35.54
8.6111	35.42
8.625	35.35
8.6389	35.29
8.6528	35.04
8.6667	35.6
8.6806	35.67
8.6945	35.79
8.7083	35.54
8.7222	35.35
8.7361	35.42
8.75	35.91
8.7639	37.04
8.7778	36.16
8.7917	35.73
8.8056	35.17
8.8195	35.91
8.8333	35.85
8.8472	35.73
8.8611	36.04
8.875	36.35
8.8889	35.73
8.9028	34.98
8.9167	34.48
8.9306	35.1
8.9445	35.23
8.9583	35.42
8.9722	36.6
8.9861	37.16
9	35.91
9.0139	36.23
9.0278	35.85
9.0417	35.42
9.0556	35.23
9.0695	34.92
9.0833	35.29
9.0972	35.42
9.1111	35.67
9.125	37.04
9.1389	36.72
9.1528	36.1
9.1667	35.73
9.1806	35.29
9.1945	35.29
9.2083	35.29
9.2222	35.67
9.2361	35.35
9.25	35.85
9.2639	36.16
9.2778	36.48
9.2917	36.6
9.3056	36.04
9.3195	35.6
9.3333	35.17
9.3472	35.17
9.3611	35.23
9.375	36.29
9.3889	35.91
9.4028	34.92
9.4167	34.36
9.4306	34.36
9.4445	34.73
9.4583	34.48
9.4722	34.67
9.4861	35.48
9.5	35.17
9.5139	35.1
9.5278	34.85
9.5417	34.85
9.5556	34.79
9.5695	34.48
9.5833	34.54
9.5972	35.35
9.6111	35.35
9.625	35.23
9.6389	34.85
9.6528	35.35
9.6667	35.85
9.6806	35.73
9.6945	35.29
9.7083	35.6
9.7222	35.48
9.7361	36.23
9.75	35.79
9.7639	35.6
9.7778	36.16
9.7917	37.6
9.8056	37.04
9.8195	36.35
9.8333	35.17
9.8472	35.48
9.8611	35.42
9.875	35.85
9.8889	35.67
9.9028	35.54
9.9167	35.98
9.9306	36.54
9.9445	35.91
9.9583	35.6
9.9722	36.35
9.9861	36.85
10	36.97
10.0139	37.35
10.0278	36.72
10.0417	36.66
10.0556	35.98
10.0695	35.6
10.0833	36.1
10.0972	36.1
10.1111	35.35
10.125	35.23
10.1389	35.73
10.1528	35.6
10.1667	35.04
10.1806	35.17
10.1945	35.42
10.2083	36.6
10.2222	36.48
10.2361	37.22
10.25	37.78
10.2639	36.6
10.2778	36.48
10.2917	35.85
10.3056	35.48
10.3195	35.6
10.3333	35.42
10.3472	35.73
10.3611	36.29
10.375	35.73
10.3889	35.48
10.4028	35.17
10.4167	35.29
10.4306	34.85
10.4445	34.67
10.4583	34.73
10.4722	34.79
10.4861	34.29
10.5	34.98
10.5139	35.85
10.5278	34.79
10.5417	34.73
10.5556	34.73
10.5695	34.85
10.5833	34.85
10.5972	34.85
10.6111	35.17
10.625	34.61
10.6389	35.35
10.6528	35.79
10.6667	35.1
10.6806	35.6
10.6945	35.23
10.7083	35.04
10.7222	35.17
10.7361	35.79
10.75	35.85
10.7639	36.41
10.7778	37.47
10.7917	36.29
10.8056	35.35
10.8195	35.35
10.8333	35.67
10.8472	35.98
10.8611	36.16
10.875	35.35
10.8889	36.16
10.9028	35.73
10.9167	35.79
10.9306	35.79
10.9445	35.6
10.9583	35.42
10.9722	36.35
10.9861	36.66
11	36.6
11.0139	37.47
11.0278	36.35
11.0417	36.66
11.0556	36.41
11.0695	36.04
11.0833	35.35
11.0972	35.35
11.1111	34.98
11.125	35.79
11.1389	35.54
11.1528	35.29
11.1667	35.29
11.1806	35.73
11.1945	35.98
11.2083	35.79
11.2222	36.04
11.2361	35.79
11.25	35.29
11.2639	35.29
11.2778	35.42
11.2917	35.67
11.3056	36.35
11.3195	35.6
11.3333	34.92
11.3472	35.17
11.3611	34.73
11.375	34.36
11.3889	34.98
11.4028	35.23
11.4167	34.79
11.4306	35.23
11.4445	36.29
11.4583	37.35
11.4722	37.1
11.4861	37.04
11.5	36.85
11.5139	36.66
11.5278	36.6
11.5417	36.04
11.5556	35.85
11.5695	35.29
11.5833	34.61
11.5972	34.17
11.6111	34.42
11.625	33.86
11.6389	34.17
11.6528	34.85
11.6667	35.48
11.6806	35.91
11.6945	35.73
11.7083	34.98
11.7222	34.98
11.7361	35.54
11.75	35.91
11.7639	35.48
11.7778	36.04
11.7917	36.16
11.8056	37.41
11.8195	36.6
11.8333	37.97
11.8472	36.72
11.8611	36.04
11.875	35.42
11.8889	35.42
11.9028	35.1
11.9167	34.98
11.9306	35.17
11.9445	36.16
11.9583	35.6
11.9722	35.85
11.9861	35.6
12	36.16
12.0139	36.04
12.0278	35.67
12.0417	36.16
12.0556	36.85
12.0695	38.03
12.0833	37.72
12.0972	37.72
12.1111	36.79
12.125	36.29
12.1389	35.91
12.1528	36.35
12.1667	37.1
12.1806	36.04
12.1945	36.29
12.2083	35.6
12.2222	35.29
12.2361	35.35
12.25	36.41
12.2639	35.79
12.2778	35.54
12.2917	35.54
12.3056	35.85
12.3195	36.54
12.3333	35.98
12.3472	35.54
12.3611	35.42
12.375	35.29
12.3889	35.67
12.4028	35.42
12.4167	35.17
12.4306	36.66
12.4445	36.6
12.4583	36.29
12.4722	36.04
12.4861	35.6
12.5	36.1
12.5139	35.6
12.5278	35.48
12.5417	35.23
12.5556	35.79
12.5695	35.29
12.5833	35.04
12.5972	35.85
12.6111	35.98
12.625	35.67
12.6389	35.79
12.6528	35.6
12.6667	35.91
12.6806	35.6
12.6945	35.98
12.7083	35.67
12.7222	35.48
12.7361	35.23
12.75	36.6
12.7639	36.16
12.7778	35.91
12.7917	35.79
12.8056	36.72
12.8195	37.91
12.8333	36.97
12.8472	37.47
12.8611	36.41
12.875	35.73
12.8889	35.73
12.9028	35.73
12.9167	36.6
12.9306	36.72
12.9445	37.47
12.9583	36.66
12.9722	37.16
12.9861	38.03
13	37.35
13.0139	37.04
13.0278	36.6
13.0417	35.48
13.0556	35.48
13.0695	36.1
13.0833	35.29
13.0972	35.1
13.1111	35.23
13.125	35.98
13.1389	36.16
13.1528	35.42
13.1667	35.23
13.1806	35.42
13.1945	36.97
13.2083	36.91
13.2222	37.41
13.2361	37.16
13.25	37.16
13.2639	36.72
13.2778	36.04
13.2917	35.23
13.3056	35.67
13.3195	35.48
13.3333	35.17
13.3472	34.79
13.3611	35.79
13.375	35.17
13.3889	34.67
13.4028	36.04
13.4167	36.04
13.4306	35.91
13.4445	35.48
13.4583	34.92
13.4722	34.92
13.4861	34.85
13.5	35.04
13.5139	34.98
13.5278	34.73
13.5417	34.79
13.5556	34.29
13.5695	35.98
13.5833	35.67
13.5972	35.6
13.6111	35.79
13.625	35.1
13.6389	35.04
13.6528	35.79
13.6667	35.73
13.6806	35.73
13.6945	36.04
13.7083	35.98
13.7222	36.04
13.7361	35.48
13.75	36.54
13.7639	36.23
13.7778	36.23
13.7917	36.29
13.8056	36.91
13.8195	36.79
13.8333	36.6
13.8472	36.66
13.8611	35.91
13.875	35.48
13.8889	36.04
13.9028	36.29
13.9167	35.79
13.9306	35.48
13.9445	35.54
13.9583	35.98
13.9722	37.35
13.9861	37.41
14	38.16
14.0139	37.1
14.0278	36.85
14.0417	36.6
14.0556	35.6
14.0695	36.41
14.0833	35.79
14.0972	36.97
14.1111	36.23
14.125	35.73
14.1389	35.29
14.1528	36.72
14.1667	36.48
14.1806	35.98
14.1945	35.67
14.2083	35.67
14.2222	36.35
14.2361	37.72
14.25	36.85
14.2639	36.66
14.2778	35.73
14.2917	35.42
14.3056	35.91
14.3195	36.54
14.3333	36.66
14.3472	36.04
14.3611	36.29
14.375	35.67
14.3889	35.48
14.4028	35.17
14.4167	35.23
14.4306	35.1
14.4445	35.1
14.4583	34.98
14.4722	35.04
14.4861	34.92
14.5	35.54
14.5139	35.1
14.5278	34.98
14.5417	34.85
14.5556	35.23
14.5695	35.48
14.5833	35.98
14.5972	35.79
14.6111	35.73
14.625	35.48
14.6389	35.35
14.6528	36.04
14.6667	35.29
14.6806	35.04
14.6945	35.6
14.7083	35.67
14.7222	36.54
14.7361	36.04
14.75	36.04
14.7639	35.98
14.7778	37.28
14.7917	37.35
14.8056	36.85
14.8195	36.1
14.8333	35.67
14.8472	35.98
14.8611	35.04
14.875	35.29
14.8889	35.29
14.9028	35.73
14.9167	36.16
14.9306	35.79
14.9445	35.98
14.9583	37.04
14.9722	34.92
14.9861	36.6
15	36.1
15.0139	35.54
15.0278	36.35
15.0417	35.67
15.0556	35.23
15.0695	35.04
15.0833	36.29
15.0972	36.66
15.1111	36.04
15.125	36.04
15.1389	36.6
15.1528	37.91
15.1667	37.53
15.1806	36.48
15.1945	36.41
15.2083	35.67
15.2222	35.17
15.2361	35.6
15.25	37.04
15.2639	36.72
15.2778	36.72
15.2917	36.23
15.3056	35.35
15.3195	35.23
15.3333	35.79
15.3472	35.91
15.3611	35.48
15.375	35.1
15.3889	34.67
15.4028	34.29
15.4167	34.98
15.4306	35.1
15.4445	34.92
15.4583	35.1
15.4722	34.36
15.4861	35.42
15.5	35.6
15.5139	35.23
15.5278	34.92
15.5417	35.04
15.5556	35.6
15.5695	35.48
15.5833	35.23
15.5972	34.92
15.6111	36.04
15.625	36.41
15.6389	35.67
15.6528	35.23
15.6667	35.6
15.6806	35.23
15.6945	35.04
15.7083	36.23
15.7222	35.6
15.7361	35.35
15.75	35.48
15.7639	36.1
15.7778	36.48
15.7917	36.16
15.8056	36.35
15.8195	36.04
15.8333	36.04
15.8472	35.79
15.8611	35.98
15.875	35.91
15.8889	35.54
15.9028	36.16
15.9167	37.28
15.9306	38.22
15.9445	36.91
15.9583	36.16
15.9722	36.41
15.9861	35.6
16	35.23
16.0139	35.67
16.0278	35.6
16.0417	35.6
16.0556	36.91
16.0695	37.6
16.0833	36.41
16.0972	36.23
16.1111	35.6
16.125	34.98
16.1389	36.04
16.1528	35.6
16.1667	35.48
16.1806	34.92
16.1945	34.42
16.2083	35.6
16.2222	35.35
16.2361	35.23
16.25	35.54
16.2639	36.85
16.2778	35.6
16.2917	35.73
16.3056	35.04
16.3195	35.79
16.3333	35.23
16.3472	35.17
16.3611	34.67
16.375	34.48
16.3889	34.73
16.4028	35.17
16.4167	35.04
16.4306	34.92
16.4445	34.92
16.4583	34.36
16.4722	34.92
16.4861	34.92
16.5	35.04
16.5139	34.54
16.5278	34.42
16.5417	34.11
16.5556	34.54
16.5695	34.54
16.5833	34.73
16.5972	34.67
16.6111	35.23
16.625	34.85
16.6389	34.92
16.6528	35.04
16.6667	34.54
16.6806	34.85
16.6945	35.23
16.7083	35.79
16.7222	35.42
16.7361	35.35
16.75	35.67
16.7639	35.98
16.7778	36.85
16.7917	36.66
16.8056	35.98
16.8195	36.23
16.8333	36.85
16.8472	36.41
16.8611	36.23
16.875	35.54
16.8889	34.23
16.9028	35.85
16.9167	35.42
16.9306	35.1
16.9445	35.79
16.9583	35.35
16.9722	35.35
16.9861	36.54
17	36.41
17.0139	36.48
17.0278	37.04
17.0417	36.97
17.0556	37.04
17.0695	37.72
17.0833	38.03
17.0972	36.91
17.1111	36.72
17.125	36.6
17.1389	36.66
17.1528	35.98
17.1667	35.85
17.1806	35.91
17.1945	36.54
17.2083	35.67
17.2222	35.1
17.2361	34.36
17.25	34.67
17.2639	35.85
17.2778	35.98
17.2917	35.17
17.3056	34.85
17.3195	34.85
17.3333	35.1
17.3472	35.04
17.3611	35.1
17.375	34.79
17.3889	34.61
17.4028	34.85
17.4167	34.48
17.4306	35.04
17.4445	34.92
17.4583	34.42
17.4722	34.29
17.4861	34.54
17.5	34.42
17.5139	34.48
17.5278	34.98
17.5417	36.16
17.5556	35.85
17.5695	35.79
17.5833	35.23
17.5972	35.29
17.6111	35.04
17.625	35.42
17.6389	34.29
17.6528	35.29
17.6667	35.23
17.6806	34.85
17.6945	35.29
17.7083	35.17
17.7222	35.91
17.7361	35.48
17.75	35.42
17.7639	35.6
17.7778	35.79
17.7917	36.54
17.8056	36.48
17.8195	36.35
17.8333	35.85
17.8472	35.54
17.8611	34.98
17.875	35.67
17.8889	35.73
17.9028	35.29
17.9167	35.85
17.9306	35.73
17.9445	35.54
17.9583	35.1
17.9722	36.35
17.9861	36.79
18	36.23
18.0139	35.85
18.0278	35.79
18.0417	36.48
18.0556	36.79
18.0695	36.48
18.0833	35.42
18.0972	37.41
18.1111	37.53
18.125	36.97
18.1389	36.48
18.1528	36.41
18.1667	35.48
18.1806	35.6
18.1945	35.67
18.2083	35.6
18.2222	36.97
18.2361	36.41
18.25	36.1
18.2639	35.42
18.2778	34.79
18.2917	33.92
18.3056	35.17
18.3195	35.73
18.3333	35.48
18.3472	34.92
18.3611	34.85
18.375	34.54
18.3889	34.98
18.4028	34.67
18.4167	34.85
18.4306	34.98
18.4445	35.91
18.4583	35.73
18.4722	35.1
18.4861	35.17
18.5	34.98
18.5139	35.1
18.5278	35.73
18.5417	35.23
18.5556	34.79
18.5695	34.85
18.5833	34.73
18.5972	35.1
18.6111	35.04
18.625	35.98
18.6389	35.54
18.6528	35.54
18.6667	35.54
18.6806	35.6
18.6945	35.85
18.7083	34.85
18.7222	34.73
18.7361	35.35
18.75	36.1
18.7639	35.42
18.7778	35.23
18.7917	36.23
18.8056	37.22
18.8195	36.48
18.8333	36.54
18.8472	36.04
18.8611	35.79
18.875	36.16
18.8889	36.54
18.9028	36.97
18.9167	38.03
18.9306	36.72
18.9445	36.29
18.9583	35.6
18.9722	34.98
18.9861	34.98
19	35.35
19.0139	35.23
19.0278	35.1
19.0417	35.1
19.0556	35.1
19.0695	35.91
19.0833	35.91
19.0972	35.98
19.1111	35.73
19.125	36.16
19.1389	36.29
19.1528	36.16
19.1667	37.41
19.1806	36.66
19.1945	36.29
19.2083	35.73
19.2222	36.72
19.2361	36.29
19.25	36.1
19.2639	35.29
19.2778	35.04
19.2917	35.1
19.3056	35.85
19.3195	36.1
19.3333	35.48
19.3472	35.48
19.3611	35.1
19.375	34.98
19.3889	35.23
19.4028	34.79
19.4167	35.54
19.4306	35.1
19.4445	34.79
19.4583	34.79
19.4722	34.73
19.4861	35.23
19.5	35.48
19.5139	35.48
19.5278	35.35
19.5417	34.85
19.5556	35.23
19.5695	34.92
19.5833	35.23
19.5972	35.04
19.6111	34.85
19.625	35.04
19.6389	35.23
19.6528	35.67
19.6667	35.23
19.6806	34.79
19.6945	35.73
19.7083	35.54
19.7222	35.54
19.7361	35.35
19.75	36.16
19.7639	36.29
19.7778	36.48
19.7917	36.41
19.8056	36.6
19.8195	35.85
19.8333	36.1
19.8472	36.35
19.8611	35.6
19.875	35.29
19.8889	35.17
19.9028	35.54
19.9167	36.91
19.9306	37.1
19.9445	37.35
19.9583	35.98
19.9722	36.54
19.9861	35.91
20	35.23
20.0139	34.85
20.0278	34.61
20.0417	35.67
20.0556	35.54
20.0695	35.1
20.0833	35.35
20.0972	35.85
20.1111	36.16
20.125	35.73
20.1389	35.23
20.1528	36.16
20.1667	35.85
20.1806	35.29
20.1945	35.29
20.2083	35.54
20.2222	35.42
20.2361	35.79
20.25	36.79
20.2639	35.73
20.2778	34.98
20.2917	35.54
20.3056	35.17
20.3195	35.04
20.3333	35.73
20.3472	35.67
20.3611	35.1
20.375	35.04
20.3889	34.92
20.4028	34.73
20.4167	34.54
20.4306	34.79
20.4445	34.48
20.4583	34.54
20.4722	35.23
20.4861	35.04
20.5	34.73
20.5139	35.23
20.5278	35.42
20.5417	35.17
20.5556	34.98
20.5695	34.73
20.5833	35.04
20.5972	35.79
20.6111	35.35
20.625	34.98
20.6389	34.73
20.6528	34.67
20.6667	35.67
20.6806	35.35
20.6945	35.17
20.7083	35.48
20.7222	35.48
20.7361	36.23
20.75	35.6
20.7639	35.98
20.7778	36.16
20.7917	35.91
20.8056	35.91
20.8195	35.98
20.8333	35.73
20.8472	35.6
20.8611	35.17
20.875	36.1
20.8889	35.48
20.9028	35.91
20.9167	35.6
20.9306	35.91
20.9445	36.23
20.9583	36.16
20.9722	36.35
20.9861	36.79
21	37.66
21.0139	36.79
21.0278	36.48
21.0417	35.98
21.0556	35.48
21.0695	35.54
21.0833	36.04
21.0972	37.04
21.1111	36.85
21.125	36.35
21.1389	35.73
21.1528	35.79
21.1667	35.6
21.1806	34.85
21.1945	34.48
21.2083	34.61
21.2222	35.67
21.2361	35.1
21.25	34.73
21.2639	34.67
21.2778	35.1
21.2917	35.6
21.3056	35.42
21.3195	35.1
21.3333	35.1
21.3472	34.61
21.3611	35.85
21.375	35.79
21.3889	35.67
21.4028	35.04
21.4167	34.92
21.4306	34.23
21.4445	34.17
21.4583	34.67
21.4722	35.6
21.4861	35.1
21.5	34.98
21.5139	34.98
21.5278	34.98
21.5417	34.98
21.5556	35.35
21.5695	35.42
21.5833	35.1
21.5972	35.79
21.6111	35.73
21.625	35.48
21.6389	35.35
21.6528	35.04
21.6667	35.48
21.6806	35.85
21.6945	35.04
21.7083	35.17
21.7222	35.04
21.7361	35.85
21.75	35.73
21.7639	36.35
21.7778	36.35
21.7917	35.98
21.8056	35.48
21.8195	35.91
21.8333	35.98
21.8472	35.67
21.8611	35.48
21.875	35.48
21.8889	35.85
21.9028	35.67
21.9167	35.29
21.9306	35.17
21.9445	36.23
21.9583	35.85
21.9722	35.73
21.9861	35.67
22	36.29
22.0139	35.91
22.0278	35.73
22.0417	35.6
22.0556	35.85
22.0695	35.73
22.0833	36.04
22.0972	35.54
22.1111	35.85
22.125	36.72
22.1389	37.22
22.1528	37.1
22.1667	36.85
22.1806	36.35
22.1945	36.1
22.2083	36.41
22.2222	36.66
22.2361	36.29
22.25	35.67
22.2639	34.85
22.2778	34.73
22.2917	35.54
22.3056	35.67
22.3195	35.23
22.3333	34.67
22.3472	34.67
22.3611	35.48
22.375	34.67
22.3889	34.36
22.4028	34.42
22.4167	34.67
22.4306	34.67
22.4445	34.29
22.4583	34.23
22.4722	34.67
22.4861	34.42
22.5	34.67
22.5139	34.29
22.5278	35.29
22.5417	35.04
22.5556	34.79
22.5695	34.85
22.5833	34.98
22.5972	35.23
22.6111	34.98
22.625	34.92
22.6389	35.67
22.6528	35.54
22.6667	35.17
22.6806	34.92
22.6945	35.54
22.7083	35.1
22.7222	35.23
22.7361	35.35
22.75	35.67
22.7639	35.73
22.7778	36.54
22.7917	35.29
22.8056	35.04
22.8195	35.85
22.8333	34.98
22.8472	34.67
22.8611	33.92
22.875	34.11
22.8889	35.29
22.9028	33.61
22.9167	32.42
22.9306	30.86
22.9445	29.8
22.9583	28.8
22.9722	27.87
22.9861	26.56
23	25.12
23.0139	23.68
23.0278	22.24
23.0417	20.99
23.0556	19.93
23.0695	18.92
23.0833	18.05
23.0972	17.3
23.1111	16.54
23.125	15.92
23.1389	15.29
23.1528	14.79
23.1667	14.29
23.1806	13.85
23.1945	13.41
23.2083	13.03
23.2222	12.66
23.2361	12.34
23.25	12.09
23.2639	11.78
23.2778	11.53
23.2917	11.34
23.3056	11.15
23.3195	10.96
23.3333	10.77
23.3472	10.52
23.3611	10.27
23.375	10.02
23.3889	9.83
23.4028	9.64
23.4167	9.39
23.4306	9.21
23.4445	9.02
23.4583	8.83
23.4722	8.58
23.4861	8.33
23.5	8.14
23.5139	7.95
23.5278	7.76
23.5417	7.51
23.5556	7.32
23.5695	7.2
23.5833	7.32
23.5972	7.57
23.6111	8.26
23.625	9.33
23.6389	10.96
23.6528	14.16
23.6667	25.37
23.6806	32.67
23.6945	35.54
23.7083	35.48
23.7222	34.98
23.7361	35.17
23.75	35.1
23.7639	35.35
23.7778	35.98
23.7917	35.42
23.8056	36.29
23.8195	36.66
23.8333	36.16
23.8472	36.23
23.8611	35.54
23.875	35.1
23.8889	35.1
23.9028	35.04
23.9167	35.6
23.9306	35.04
23.9445	35.23
23.9583	35.17
23.9722	35.29
23.9861	35.1
24	35.29
24.0139	36.1
24.0278	35.6
24.0417	35.17
24.0556	34.98
24.0695	34.85
24.0833	35.73
24.0972	35.29
24.1111	35.29
24.125	35.35
24.1389	34.92
24.1528	35.91
24.1667	35.35
24.1806	35.17
24.1945	35.48
24.2083	35.35
24.2222	35.48
24.2361	35.29
24.25	35.67
24.2639	35.73
24.2778	35.98
24.2917	35.6
24.3056	35.73
24.3195	36.41
24.3333	36.48
24.3472	36.97
24.3611	36.66
24.375	36.41
24.3889	35.91
24.4028	36.04
24.4167	35.17
24.4306	35.23
24.4445	35.23
24.4583	35.23
24.4722	35.98
24.4861	35.79
24.5	36.1
24.5139	35.48
24.5278	35.48
24.5417	34.73
24.5556	34.92
24.5695	34.67
24.5833	35.85
24.5972	35.79
24.6111	34.85
24.625	35.42
24.6389	35.67
24.6528	35.04
24.6667	35.17
24.6806	35.23
24.6945	34.85
24.7083	36.16
24.7222	35.42
24.7361	35.23
24.75	35.35
24.7639	35.23
24.7778	35.1
24.7917	35.6
24.8056	34.92
24.8195	35.04
24.8333	35.48
24.8472	35.29
24.8611	35.79
24.875	35.98
24.8889	35.42
24.9028	35.04
24.9167	35.04
24.9306	35.6
24.9445	35.17
24.9583	35.79
24.9722	36.1
24.9861	36.35
25	36.48
25.0139	35.79
25.0278	35.6
25.0417	35.54
25.0556	35.42
25.0695	35.91
25.0833	36.16
25.0972	35.79
25.1111	35.35
25.125	35.48
25.1389	36.41
25.1528	37.16
25.1667	36.29
25.1806	35.73
25.1945	35.48
25.2083	35.85
25.2222	36.35
25.2361	35.48
25.25	36.35
25.2639	35.48
25.2778	35.29
25.2917	34.61
25.3056	34.61
25.3195	34.73
25.3333	35.35
25.3472	35.17
25.3611	34.85
25.375	34.61
25.3889	34.54
25.4028	34.42
25.4167	34.29
25.4306	33.8
25.4445	35.23
25.4583	34.85
25.4722	34.98
25.4861	35.1
25.5	35.42
25.5139	35.73
25.5278	34.92
25.5417	35.54
25.5556	35.04
25.5695	35.6
25.5833	35.1
25.5972	34.85
25.6111	34.79
25.625	35.29
25.6389	35.42
25.6528	34.67
25.6667	34.29
25.6806	34.67
25.6945	34.92
25.7083	36.1
25.7222	35.73
25.7361	35.48
25.75	35.85
25.7639	35.98
25.7778	36.04
25.7917	35.23
25.8056	34.85
25.8195	35.73
25.8333	35.73
25.8472	35.48
25.8611	35.1
25.875	34.48
25.8889	34.61
25.9028	35.67
25.9167	36.1
25.9306	35.6
25.9445	35.48
25.9583	36.23
25.9722	37.1
25.9861	36.29
26	35.85
26.0139	35.73
26.0278	35.6
26.0417	35.54
26.0556	35.6
26.0695	36.35
26.0833	35.85
26.0972	36.6
26.1111	37.22
26.125	36.54
26.1389	36.48
26.1528	35.91
26.1667	35.23
26.1806	34.48
26.1945	33.48
26.2083	32.3
26.2222	31.05
26.2361	30.55
26.25	30.3
26.2639	29.12
26.2778	28.12
26.2917	26.93
26.3056	26.06
26.3195	24.87
26.3333	23.74
26.3472	22.55
26.3611	21.49
26.375	20.43
26.3889	19.49
26.4028	18.55
26.4167	17.67
26.4306	16.86
26.4445	16.17
26.4583	15.42
26.4722	14.79
26.4861	14.16
26.5	13.66
26.5139	13.16
26.5278	12.66
26.5417	12.22
26.5556	11.84
26.5695	11.46
26.5833	11.15
26.5972	10.84
26.6111	10.52
26.625	10.27
26.6389	10.02
26.6528	9.83
26.6667	9.71
26.6806	9.52
26.6945	9.33
26.7083	9.21
26.7222	9.14
26.7361	9.02
26.75	9.02
26.7639	9.02
26.7778	8.95
26.7917	8.95
26.8056	9.02
26.8195	8.95
26.8333	8.95
26.8472	8.95
26.8611	8.89
26.875	8.89
26.8889	8.89
26.9028	8.89
26.9167	8.89
26.9306	8.89
26.9445	8.89
26.9583	8.89
26.9722	8.95
26.9861	8.95
27	8.95
27.0139	8.95
27.0278	8.95
27.0417	8.95
27.0556	8.95
27.0695	8.95
27.0833	8.95
27.0972	9.02
27.1111	9.02
27.125	9.02
27.1389	9.02
27.1528	9.02
27.1667	9.02
27.1806	9.02
27.1945	9.02
27.2083	9.02
27.2222	9.02
27.2361	9.02
27.25	9.02
27.2639	9.02
27.2778	9.02
27.2917	9.02
27.3056	9.02
27.3195	9.02
27.3333	9.02
27.3472	9.02
27.3611	8.95
27.375	8.95
27.3889	8.89
27.4028	8.83
27.4167	8.83
27.4306	8.7
27.4445	8.64
27.4583	8.64
27.4722	8.51
27.4861	8.45
27.5	8.39
27.5139	8.33
27.5278	8.26
27.5417	8.2
27.5556	8.2
27.5695	8.14
27.5833	8.07
27.5972	8.07
27.6111	8.01
27.625	8.01
27.6389	7.89
27.6528	7.82
27.6667	7.76
27.6806	7.7
27.6945	7.57
27.7083	7.45
27.7222	7.38
27.7361	7.38
27.75	7.32
27.7639	7.26
27.7778	7.26
27.7917	7.2
27.8056	7.2
27.8195	7.2
27.8333	7.2
27.8472	7.2
27.8611	7.2
27.875	7.2
27.8889	7.2
27.9028	7.2
27.9167	7.2
27.9306	7.26
27.9445	7.26
27.9583	7.32
27.9722	7.32
27.9861	7.38
28	7.38
28.0139	7.45
28.0278	7.45
28.0417	7.51
28.0556	7.51
28.0695	7.57
28.0833	7.64
28.0972	7.64
28.1111	7.7
28.125	7.7
28.1389	7.76
28.1528	7.82
28.1667	7.82
28.1806	7.82
28.1945	7.82
28.2083	7.89
28.2222	7.89
28.2361	7.89
28.25	7.89
28.2639	7.95
28.2778	7.95
28.2917	7.95
28.3056	7.95
28.3195	8.01
28.3333	7.95
28.3472	7.95
28.3611	7.89
28.375	7.89
28.3889	7.76
28.4028	7.7
28.4167	7.64
28.4306	7.51
28.4445	7.38
28.4583	7.51
28.4722	7.95
28.4861	8.64
28.5	9.64
28.5139	11.34
28.5278	13.97
28.5417	19.61
28.5556	30.24
28.5695	33.92
28.5833	35.91
28.5972	35.67
28.6111	35.29
28.625	36.1
28.6389	36.1
28.6528	35.67
28.6667	35.35
28.6806	35.54
28.6945	35.29
28.7083	35.23
28.7222	35.67
[truncated: 6,128 more rows]

## Sheet: 8C_AN9
0.9583	37.35
0.9722	36.35
0.9861	35.91
1	36.04
1.0139	37.1
1.0278	37.04
1.0417	36.54
1.0556	36.41
1.0695	36.23
1.0833	36.91
1.0972	37.04
1.1111	37.28
1.125	36.79
1.1389	36.66
1.1528	36.41
1.1667	36.35
1.1806	36.16
1.1945	37.1
1.2083	36.91
1.2222	35.54
1.2361	35.29
1.25	34.73
1.2639	34.48
1.2778	34.85
1.2917	36.35
1.3056	35.91
1.3195	35.67
1.3333	35.67
1.3472	35.42
1.3611	36.23
1.375	35.91
1.3889	36.48
1.4028	36.23
1.4167	35.79
1.4306	36.35
1.4445	35.85
1.4583	36.16
1.4722	36.04
1.4861	35.85
1.5	35.73
1.5139	36.48
1.5278	36.29
1.5417	36.48
1.5556	36.41
1.5695	35.98
1.5833	36.54
1.5972	36.29
1.6111	35.79
1.625	35.91
1.6389	36.1
1.6528	35.98
1.6667	36.04
1.6806	36.29
1.6945	36.16
1.7083	36.54
1.7222	35.91
1.7361	36.66
1.75	36.79
1.7639	36.79
1.7778	36.41
1.7917	36.66
1.8056	36.66
1.8195	37.78
1.8333	37.35
1.8472	37.1
1.8611	36.35
1.875	36.72
1.8889	37.04
1.9028	37.1
1.9167	37.04
1.9306	37.04
1.9445	36.1
1.9583	36.35
1.9722	36.48
1.9861	36.54
2	36.35
2.0139	36.23
2.0278	36.85
2.0417	36.85
2.0556	36.48
2.0695	38.34
2.0833	37.16
2.0972	37.04
2.1111	36.85
2.125	36.72
2.1389	36.85
2.1528	36.72
2.1667	36.23
2.1806	35.98
2.1945	36.04
2.2083	35.73
2.2222	35.91
2.2361	35.67
2.25	35.67
2.2639	35.98
2.2778	36.04
2.2917	35.85
2.3056	35.91
2.3195	35.98
2.3333	35.98
2.3472	35.23
2.3611	36.23
2.375	36.35
2.3889	35.73
2.4028	35.48
2.4167	35.42
2.4306	35.67
2.4445	35.85
2.4583	35.54
2.4722	35.29
2.4861	35.91
2.5	35.54
2.5139	35.6
2.5278	35.98
2.5417	36.1
2.5556	35.85
2.5695	35.6
2.5833	36.04
2.5972	35.73
2.6111	35.91
2.625	36.48
2.6389	36.48
2.6528	36.1
2.6667	35.98
2.6806	36.1
2.6945	36.91
2.7083	36.85
2.7222	36.41
2.7361	36.23
2.75	36.48
2.7639	36.85
2.7778	37.04
2.7917	36.54
2.8056	36.66
2.8195	37.35
2.8333	37.53
2.8472	37.28
2.8611	36.91
2.875	36.6
2.8889	37.04
2.9028	36.23
2.9167	35.67
2.9306	36.35
2.9445	36.29
2.9583	37.72
2.9722	37.16
2.9861	36.66
3	36.54
3.0139	36.41
3.0278	37.35
3.0417	37.97
3.0556	37.66
3.0695	37.35
3.0833	36.91
3.0972	36.16
3.1111	36.16
3.125	35.79
3.1389	35.79
3.1528	36.16
3.1667	36.54
3.1806	36.41
3.1945	35.91
3.2083	35.23
3.2222	34.98
3.2361	36.41
3.25	36.1
3.2639	36.04
3.2778	35.85
3.2917	36.04
3.3056	35.73
3.3195	36.35
3.3333	36.35
3.3472	35.6
3.3611	35.91
3.375	35.67
3.3889	36.41
3.4028	35.85
3.4167	35.85
3.4306	35.73
3.4445	35.79
3.4583	35.91
3.4722	35.67
3.4861	34.98
3.5	35.54
3.5139	35.79
3.5278	35.91
3.5417	35.67
3.5556	35.29
3.5695	36.16
3.5833	35.85
3.5972	36.04
3.6111	36.6
3.625	35.79
3.6389	35.79
3.6528	35.98
3.6667	36.6
3.6806	36.54
3.6945	36.16
3.7083	36.85
3.7222	36.35
3.7361	36.66
3.75	36.79
3.7639	36.79
3.7778	37.78
3.7917	37.66
3.8056	37.1
3.8195	36.48
3.8333	36.97
3.8472	36.66
3.8611	36.1
3.875	36.54
3.8889	36.29
3.9028	36.91
3.9167	36.66
3.9306	36.48
3.9445	37.41
3.9583	37.78
3.9722	37.78
3.9861	37.91
4	37.16
4.0139	36.72
4.0278	36.54
4.0417	36.97
4.0556	36.91
4.0695	37.04
4.0833	37.04
4.0972	37.22
4.1111	36.97
4.125	36.29
4.1389	35.91
4.1528	36.04
4.1667	36.04
4.1806	36.04
4.1945	36.41
4.2083	36.29
4.2222	36.1
4.2361	36.1
4.25	36.6
4.2639	36.54
4.2778	36.23
4.2917	35.73
4.3056	35.91
4.3195	35.35
4.3333	35.79
4.3472	35.6
4.3611	35.73
4.375	35.79
4.3889	35.85
4.4028	35.54
4.4167	35.48
4.4306	35.54
4.4445	36.29
4.4583	35.98
4.4722	36.04
4.4861	35.85
4.5	35.91
4.5139	36.29
4.5278	36.23
4.5417	35.91
4.5556	35.79
4.5695	35.54
4.5833	35.35
4.5972	35.1
4.6111	35.54
4.625	36.1
4.6389	35.54
4.6528	35.17
4.6667	36.35
4.6806	35.54
4.6945	35.67
4.7083	36.29
4.7222	36.48
4.7361	36.16
4.75	36.04
4.7639	36.6
4.7778	36.85
4.7917	36.72
4.8056	37.78
4.8195	37.72
4.8333	37.22
4.8472	37.35
4.8611	36.91
4.875	36.29
4.8889	35.98
4.9028	37.35
4.9167	36.48
4.9306	37.53
4.9445	37.35
4.9583	37.6
4.9722	37.53
4.9861	37.78
5	37.72
5.0139	36.85
5.0278	35.91
5.0417	36.35
5.0556	36.16
5.0695	36.66
5.0833	36.72
5.0972	36.91
5.1111	37.85
5.125	37.78
5.1389	37.35
5.1528	36.66
5.1667	36.23
5.1806	36.1
5.1945	35.79
5.2083	36.72
5.2222	36.85
5.2361	36.54
5.25	36.35
5.2639	36.04
5.2778	35.29
5.2917	36.1
5.3056	35.73
5.3195	35.67
5.3333	36.23
5.3472	36.04
5.3611	35.85
5.375	35.79
5.3889	35.73
5.4028	35.29
5.4167	35.35
5.4306	35.1
5.4445	36.35
5.4583	36.23
5.4722	35.54
5.4861	35.42
5.5	35.54
5.5139	35.17
5.5278	35.42
5.5417	35.1
5.5556	35.04
5.5695	35.6
5.5833	35.29
5.5972	35.6
5.6111	35.23
5.625	35.42
5.6389	35.73
5.6528	36.23
5.6667	35.73
5.6806	35.73
5.6945	35.79
5.7083	35.91
5.7222	36.85
5.7361	36.41
5.75	36.35
5.7639	36.66
5.7778	36.16
5.7917	37.66
5.8056	36.66
5.8195	36.41
5.8333	37.16
5.8472	37.1
5.8611	37.35
5.875	37.16
5.8889	36.79
5.9028	36.91
5.9167	36.54
5.9306	37.16
5.9445	36.41
5.9583	36.23
5.9722	37.35
5.9861	37.47
6	37.66
6.0139	37.16
6.0278	36.66
6.0417	36.16
6.0556	36.1
6.0695	36.35
6.0833	36.23
6.0972	37.28
6.1111	36.91
6.125	36.72
6.1389	36.66
6.1528	36.23
6.1667	36.04
6.1806	35.79
6.1945	36.97
6.2083	36.97
6.2222	37.53
6.2361	36.91
6.25	36.6
6.2639	36.23
6.2778	35.85
6.2917	35.6
6.3056	35.48
6.3195	35.73
6.3333	36.16
6.3472	35.98
6.3611	35.35
6.375	35.1
6.3889	35.04
6.4028	35.48
6.4167	35.17
6.4306	34.98
6.4445	35.54
6.4583	35.29
6.4722	35.54
6.4861	35.6
6.5	35.91
6.5139	36.04
6.5278	35.23
6.5417	35.04
6.5556	35.23
6.5695	35.29
6.5833	35.17
6.5972	35.17
6.6111	35.1
6.625	35.48
6.6389	35.23
6.6528	34.73
6.6667	35.67
6.6806	35.54
6.6945	35.35
6.7083	35.6
6.7222	35.85
6.7361	35.91
6.75	36.66
6.7639	36.97
6.7778	36.85
6.7917	36.85
6.8056	36.29
6.8195	36.23
6.8333	36.48
6.8472	36.1
6.8611	36.04
6.875	36.41
6.8889	35.98
6.9028	35.91
6.9167	37.1
6.9306	37.35
6.9445	36.91
6.9583	37.66
6.9722	37.22
6.9861	37.53
7	36.85
7.0139	37.16
7.0278	36.54
7.0417	35.85
7.0556	36.29
7.0695	36.1
7.0833	36.66
7.0972	36.54
7.1111	36.79
7.125	37.41
7.1389	37.6
7.1528	37.66
7.1667	35.98
7.1806	35.17
7.1945	34.85
7.2083	34.79
7.2222	36.16
7.2361	35.6
7.25	35.98
7.2639	35.79
7.2778	35.67
7.2917	36.54
7.3056	35.6
7.3195	36.23
7.3333	36.16
7.3472	35.6
7.3611	35.42
7.375	36.16
7.3889	35.67
7.4028	35.85
7.4167	35.79
7.4306	34.92
7.4445	35.17
7.4583	35.67
7.4722	35.98
7.4861	35.35
7.5	34.98
7.5139	35.91
7.5278	35.73
7.5417	36.16
7.5556	36.35
7.5695	35.91
7.5833	35.6
7.5972	36.35
7.6111	35.85
7.625	36.35
7.6389	36.1
7.6528	36.1
7.6667	35.73
7.6806	36.04
7.6945	35.85
7.7083	36.23
7.7222	35.98
7.7361	35.35
7.75	36.41
7.7639	36.72
7.7778	36.23
7.7917	36.79
7.8056	37.97
7.8195	36.72
7.8333	37.41
7.8472	36.54
7.8611	35.98
7.875	36.85
7.8889	36.54
7.9028	36.35
7.9167	36.41
7.9306	36.6
7.9445	36.97
7.9583	36.91
7.9722	37.78
7.9861	37.04
8	37.16
8.0139	36.72
8.0278	36.35
8.0417	35.98
8.0556	35.98
8.0695	35.29
8.0833	36.29
8.0972	36.29
8.1111	36.54
8.125	36.72
8.1389	37.28
8.1528	37.04
8.1667	36.35
8.1806	36.16
8.1945	36.16
8.2083	35.91
8.2222	36.48
8.2361	36.04
8.25	35.67
8.2639	35.29
8.2778	36.04
8.2917	35.6
8.3056	35.91
8.3195	35.79
8.3333	35.98
8.3472	36.16
8.3611	35.91
8.375	35.42
8.3889	35.23
8.4028	35.23
8.4167	35.23
8.4306	35.85
8.4445	35.85
8.4583	35.6
8.4722	35.6
8.4861	35.48
8.5	35.73
8.5139	35.79
8.5278	35.29
8.5417	35.1
8.5556	34.85
8.5695	36.23
8.5833	35.91
8.5972	35.54
8.6111	35.73
8.625	35.91
8.6389	35.42
8.6528	35.67
8.6667	35.85
8.6806	35.91
8.6945	36.04
8.7083	35.85
8.7222	35.98
8.7361	35.54
8.75	36.54
8.7639	36.16
8.7778	35.98
8.7917	37.28
8.8056	36.85
8.8195	37.78
8.8333	37.04
8.8472	37.1
8.8611	37.28
8.875	36.6
8.8889	36.54
8.9028	37.04
8.9167	37.53
8.9306	37.1
8.9445	36.48
8.9583	37.04
8.9722	36.85
8.9861	36.85
9	36.04
9.0139	35.79
9.0278	36.29
9.0417	35.98
9.0556	35.35
9.0695	36.79
9.0833	36.72
9.0972	36.35
9.1111	36.97
9.125	38.03
9.1389	37.16
9.1528	37.04
9.1667	36.79
9.1806	36.04
9.1945	35.42
9.2083	36.48
9.2222	35.98
9.2361	36.35
9.25	36.04
9.2639	35.67
9.2778	35.29
9.2917	35.54
9.3056	36.04
9.3195	35.67
9.3333	35.1
9.3472	34.98
9.3611	34.98
9.375	35.48
9.3889	35.48
9.4028	36.16
9.4167	35.98
9.4306	34.98
9.4445	34.79
9.4583	35.23
9.4722	34.92
9.4861	35.98
9.5	35.73
9.5139	35.29
9.5278	35.67
9.5417	35.54
9.5556	35.79
9.5695	35.48
9.5833	36.04
9.5972	35.6
9.6111	35.79
9.625	34.98
9.6389	35.04
9.6528	35.1
9.6667	35.17
9.6806	36.16
9.6945	35.67
9.7083	34.79
9.7222	35.79
9.7361	35.79
9.75	36.16
9.7639	37.1
9.7778	37.22
9.7917	36.54
9.8056	36.41
9.8195	36.16
9.8333	36.48
9.8472	37.22
9.8611	37.16
9.875	36.85
9.8889	36.66
9.9028	36.48
9.9167	36.48
9.9306	37.91
9.9445	37.35
9.9583	37.53
9.9722	37.85
9.9861	37.66
10	37.28
10.0139	37.1
10.0278	36.16
10.0417	35.98
10.0556	35.67
10.0695	35.6
10.0833	36.29
10.0972	36.54
10.1111	36.91
10.125	36.66
10.1389	36.29
10.1528	36.04
10.1667	35.91
10.1806	36.1
10.1945	35.79
10.2083	35.73
10.2222	36.6
10.2361	36.23
10.25	37.1
10.2639	36.66
10.2778	36.23
10.2917	35.42
10.3056	34.98
10.3195	35.48
10.3333	36.04
10.3472	35.54
10.3611	35.04
10.375	34.92
10.3889	34.54
10.4028	35.48
10.4167	35.48
10.4306	34.92
10.4445	35.6
10.4583	35.54
10.4722	35.42
10.4861	35.42
10.5	35.29
10.5139	35.6
10.5278	36.23
10.5417	35.85
10.5556	35.91
10.5695	35.73
10.5833	36.1
10.5972	35.79
10.6111	35.17
10.625	34.92
10.6389	34.67
10.6528	34.73
10.6667	35.67
10.6806	34.92
10.6945	35.48
10.7083	35.35
10.7222	35.42
10.7361	35.54
10.75	35.91
10.7639	36.23
10.7778	36.48
10.7917	36.1
10.8056	36.97
10.8195	37.16
10.8333	36.91
10.8472	36.79
10.8611	36.41
10.875	36.48
10.8889	36.79
10.9028	36.72
10.9167	36.6
10.9306	37.53
10.9445	37.22
10.9583	37.04
10.9722	37.04
10.9861	37.41
11	37.22
11.0139	36.97
11.0278	36.23
11.0417	35.98
11.0556	35.42
11.0695	35.98
11.0833	35.54
11.0972	35.73
11.1111	36.48
11.125	36.23
11.1389	36.16
11.1528	36.91
11.1667	37.53
11.1806	37.22
11.1945	36.85
11.2083	36.23
11.2222	35.79
11.2361	35.73
11.25	35.79
11.2639	35.79
11.2778	36.1
11.2917	36.29
11.3056	36.41
11.3195	35.73
11.3333	35.29
11.3472	34.98
11.3611	35.79
11.375	36.23
11.3889	35.73
11.4028	35.35
11.4167	34.98
11.4306	35.29
11.4445	36.66
11.4583	37.47
11.4722	36.97
11.4861	37.16
11.5	36.66
11.5139	36.66
11.5278	36.23
11.5417	36.16
11.5556	35.23
11.5695	34.73
11.5833	35.04
11.5972	34.67
11.6111	34.79
11.625	34.42
11.6389	35.54
11.6528	36.1
11.6667	36.04
11.6806	35.6
11.6945	35.98
11.7083	36.16
11.7222	36.23
11.7361	36.41
11.75	36.6
11.7639	36.79
11.7778	36.91
11.7917	36.16
11.8056	35.67
11.8195	37.1
11.8333	36.72
11.8472	36.97
11.8611	38.03
11.875	37.22
11.8889	37.28
11.9028	37.04
11.9167	37.47
11.9306	37.22
11.9445	37.22
11.9583	37.47
11.9722	37.66
11.9861	37.47
12	36.97
12.0139	36.6
12.0278	35.91
12.0417	36.72
12.0556	36.54
12.0695	37.28
12.0833	37.53
12.0972	37.22
12.1111	37.16
12.125	36.16
12.1389	36.1
12.1528	36.04
12.1667	36.66
12.1806	36.72
12.1945	37.16
12.2083	36.6
12.2222	36.48
12.2361	35.85
12.25	35.48
12.2639	35.23
12.2778	35.17
12.2917	35.23
12.3056	35.85
12.3195	35.23
12.3333	34.98
12.3472	35.48
12.3611	35.48
12.375	35.67
12.3889	35.42
12.4028	35.48
12.4167	35.85
12.4306	36.72
12.4445	36.6
12.4583	36.66
12.4722	36.16
12.4861	35.79
12.5	35.35
12.5139	35.23
12.5278	35.73
12.5417	35.23
12.5556	35.98
12.5695	36.72
12.5833	35.98
12.5972	35.35
12.6111	36.85
12.625	36.85
12.6389	37.1
12.6528	37.28
12.6667	37.1
12.6806	36.6
12.6945	36.72
12.7083	35.91
12.7222	35.17
12.7361	35.48
12.75	35.67
12.7639	36.1
12.7778	36.35
12.7917	36.97
12.8056	36.91
12.8195	36.41
12.8333	35.85
12.8472	35.98
12.8611	36.29
12.875	36.48
12.8889	36.48
12.9028	37.04
12.9167	37.22
12.9306	36.91
12.9445	36.72
12.9583	37.78
12.9722	37.1
12.9861	37.6
13	38.03
13.0139	37.53
13.0278	37.04
13.0417	36.23
13.0556	35.67
13.0695	36.97
13.0833	36.23
13.0972	36.29
13.1111	36.97
13.125	37.85
13.1389	36.66
13.1528	37.22
13.1667	36.29
13.1806	35.67
13.1945	35.6
13.2083	35.17
13.2222	34.98
13.2361	35.6
13.25	35.73
13.2639	35.73
13.2778	35.48
13.2917	35.98
13.3056	35.85
13.3195	35.67
13.3333	35.48
13.3472	36.41
13.3611	36.1
13.375	35.73
13.3889	35.35
13.4028	35.48
13.4167	35.6
13.4306	35.85
13.4445	35.67
13.4583	35.85
13.4722	35.79
13.4861	35.42
13.5	34.98
13.5139	35.35
13.5278	35.42
13.5417	36.23
13.5556	35.98
13.5695	35.73
13.5833	35.23
13.5972	35.35
13.6111	35.67
13.625	36.16
13.6389	36.04
13.6528	35.54
13.6667	35.6
13.6806	35.91
13.6945	35.54
13.7083	35.6
13.7222	35.98
13.7361	36.23
13.75	36.29
13.7639	36.85
13.7778	36.91
13.7917	35.98
13.8056	36.66
13.8195	36.72
13.8333	37.16
13.8472	37.47
13.8611	36.91
13.875	37.35
13.8889	37.04
13.9028	36.79
13.9167	37.04
13.9306	37.47
13.9445	37.47
13.9583	37.22
13.9722	37.66
13.9861	37.66
14	37.6
14.0139	37.22
14.0278	37.47
14.0417	36.97
14.0556	35.98
14.0695	37.04
14.0833	36.54
14.0972	36.79
14.1111	36.79
14.125	35.67
14.1389	35.04
14.1528	34.92
14.1667	34.73
14.1806	36.04
14.1945	36.48
14.2083	35.73
14.2222	35.79
14.2361	35.23
14.25	34.92
14.2639	34.92
14.2778	35.54
14.2917	36.29
14.3056	35.73
14.3195	35.17
14.3333	34.92
14.3472	35.98
14.3611	35.23
14.375	34.92
14.3889	35.48
14.4028	35.29
14.4167	35.1
14.4306	35.6
14.4445	36.41
14.4583	35.98
14.4722	35.67
14.4861	35.79
14.5	35.1
14.5139	35.29
14.5278	35.29
14.5417	35.79
14.5556	35.91
14.5695	35.17
14.5833	35.29
14.5972	35.6
14.6111	36.85
14.625	37.35
14.6389	36.72
14.6528	36.66
14.6667	36.16
14.6806	35.6
14.6945	35.6
14.7083	36.1
14.7222	36.54
14.7361	36.16
14.75	35.73
14.7639	35.6
14.7778	37.28
14.7917	37.72
14.8056	37.66
14.8195	37.28
14.8333	36.97
14.8472	36.35
14.8611	36.1
14.875	36.23
14.8889	36.91
14.9028	36.29
14.9167	36.6
14.9306	37.22
14.9445	37.6
14.9583	37.78
14.9722	37.47
14.9861	37.16
15	36.91
15.0139	36.72
15.0278	36.04
15.0417	36.1
15.0556	36.1
15.0695	36.35
15.0833	37.41
15.0972	37.91
15.1111	37.28
15.125	36.85
15.1389	36.72
15.1528	36.85
15.1667	36.1
15.1806	35.73
15.1945	35.29
15.2083	35.1
15.2222	35.1
15.2361	35.23
15.25	36.23
15.2639	35.73
15.2778	35.1
15.2917	34.92
15.3056	36.1
15.3195	35.6
15.3333	35.29
15.3472	35.48
15.3611	35.23
15.375	35.17
15.3889	35.1
15.4028	35.85
15.4167	35.85
15.4306	35.79
15.4445	35.29
15.4583	35.35
15.4722	34.73
15.4861	35.98
15.5	35.6
15.5139	35.29
15.5278	35.29
15.5417	35.35
15.5556	35.42
15.5695	35.79
15.5833	36.29
15.5972	35.67
15.6111	35.35
15.625	35.17
15.6389	35.42
15.6528	35.1
15.6667	35.17
15.6806	35.35
15.6945	35.79
15.7083	35.73
15.7222	35.6
15.7361	36.41
15.75	36.35
15.7639	35.91
15.7778	36.04
15.7917	36.79
15.8056	36.72
15.8195	36.35
15.8333	35.98
15.8472	35.67
15.8611	35.98
15.875	35.85
15.8889	35.98
15.9028	36.85
15.9167	37.41
15.9306	37.35
15.9445	37.47
15.9583	37.78
15.9722	37.04
15.9861	37.28
16	37.16
16.0139	37.16
16.0278	36.91
16.0417	36.72
16.0556	35.91
16.0695	34.98
16.0833	35.91
16.0972	35.54
16.1111	36.41
16.125	36.54
16.1389	36.85
16.1528	37.66
16.1667	37.53
16.1806	37.1
16.1945	36.91
16.2083	36.97
16.2222	35.98
16.2361	35.6
16.25	35.23
16.2639	36.35
16.2778	36.72
16.2917	36.35
16.3056	35.48
16.3195	35.17
16.3333	35.79
16.3472	35.29
16.3611	34.98
16.375	34.98
16.3889	34.98
16.4028	34.92
16.4167	35.17
16.4306	34.67
16.4445	34.85
16.4583	35.54
16.4722	35.1
16.4861	34.73
16.5	34.67
16.5139	35.98
16.5278	35.67
16.5417	35.29
16.5556	35.04
16.5695	35.04
16.5833	34.85
16.5972	35.91
16.6111	35.6
16.625	35.54
16.6389	35.67
16.6528	35.35
16.6667	35.35
16.6806	35.67
16.6945	36.16
16.7083	35.91
16.7222	35.67
16.7361	35.73
16.75	35.54
16.7639	36.54
16.7778	37.1
16.7917	36.48
16.8056	36.41
16.8195	36.04
16.8333	35.79
16.8472	36.35
16.8611	36.16
16.875	35.98
16.8889	36.79
16.9028	37.16
16.9167	37.41
16.9306	37.72
16.9445	37.28
16.9583	37.6
16.9722	37.53
16.9861	36.54
17	36.79
17.0139	35.91
17.0278	35.6
17.0417	35.98
17.0556	35.85
17.0695	36.04
17.0833	36.16
17.0972	36.79
17.1111	37.35
17.125	36.72
17.1389	36.79
17.1528	35.79
17.1667	35.17
17.1806	34.92
17.1945	35.91
17.2083	35.29
17.2222	34.92
17.2361	35.17
17.25	35.73
17.2639	35.29
17.2778	34.98
17.2917	34.73
17.3056	36.54
17.3195	36.48
17.3333	35.98
17.3472	35.42
17.3611	35.17
17.375	34.85
17.3889	35.04
17.4028	36.23
17.4167	35.85
17.4306	35.6
17.4445	35.54
17.4583	35.1
17.4722	34.61
17.4861	35.42
17.5	35.17
17.5139	35.1
17.5278	35.23
17.5417	35.1
17.5556	34.92
17.5695	34.61
17.5833	35.29
17.5972	35.54
17.6111	34.92
17.625	34.92
17.6389	35.23
17.6528	35.35
17.6667	35.04
17.6806	35.98
17.6945	35.85
17.7083	35.6
17.7222	35.67
17.7361	35.67
17.75	35.48
17.7639	36.16
17.7778	35.54
17.7917	36.1
17.8056	36.41
17.8195	37.22
17.8333	37.1
17.8472	35.98
17.8611	36.29
17.875	35.73
17.8889	35.54
17.9028	36.1
17.9167	35.73
17.9306	36.72
17.9445	36.91
17.9583	37.41
17.9722	37.35
17.9861	36.97
18	37.1
18.0139	36.97
18.0278	36.23
18.0417	35.73
18.0556	36.6
18.0695	36.23
18.0833	36.66
18.0972	36.6
18.1111	35.48
18.125	35.67
18.1389	35.48
18.1528	35.54
18.1667	35.6
18.1806	36.29
18.1945	36.41
18.2083	36.66
18.2222	36.54
18.2361	36.48
18.25	36.23
18.2639	36.23
18.2778	35.42
18.2917	34.98
18.3056	34.36
18.3195	34.23
18.3333	34.29
18.3472	34.29
18.3611	34.17
18.375	34.85
18.3889	34.23
18.4028	33.92
18.4167	34.85
18.4306	34.79
18.4445	34.29
18.4583	34.73
18.4722	35.54
18.4861	35.17
18.5	34.61
18.5139	34.92
18.5278	35.04
18.5417	34.85
18.5556	34.98
18.5695	34.79
18.5833	34.79
18.5972	35.35
18.6111	35.35
18.625	35.35
18.6389	35.79
18.6528	35.1
18.6667	34.98
18.6806	35.79
18.6945	35.6
18.7083	35.17
18.7222	35.04
18.7361	36.66
18.75	36.16
18.7639	36.23
18.7778	35.85
18.7917	36.41
18.8056	36.79
18.8195	37.53
18.8333	36.91
18.8472	36.23
18.8611	35.85
18.875	36.35
18.8889	35.98
18.9028	35.79
18.9167	35.73
18.9306	36.79
18.9445	37.66
18.9583	37.66
18.9722	36.91
18.9861	37.72
19	37.6
19.0139	37.53
19.0278	37.53
19.0417	37.04
19.0556	36.91
19.0695	36.1
19.0833	36.41
19.0972	35.79
19.1111	36.29
19.125	36.41
19.1389	37.66
19.1528	37.28
19.1667	36.41
19.1806	36.91
19.1945	36.1
19.2083	35.48
19.2222	35.29
19.2361	35.29
19.25	35.98
19.2639	35.73
19.2778	35.23
19.2917	34.92
19.3056	34.67
19.3195	35.23
19.3333	34.79
19.3472	34.67
19.3611	34.79
19.375	35.1
19.3889	35.73
19.4028	35.67
19.4167	35.42
19.4306	35.23
19.4445	34.79
19.4583	34.61
19.4722	35.29
19.4861	34.92
19.5	35.91
19.5139	35.54
19.5278	35.23
19.5417	35.17
19.5556	34.79
19.5695	35.98
19.5833	35.67
19.5972	35.17
19.6111	34.85
19.625	34.67
19.6389	35.85
19.6528	35.23
19.6667	35.73
19.6806	35.6
19.6945	35.54
19.7083	35.42
19.7222	36.16
19.7361	35.67
19.75	35.35
19.7639	35.91
19.7778	35.6
19.7917	37.1
19.8056	37.04
19.8195	36.54
19.8333	36.79
19.8472	36.29
19.8611	35.91
19.875	35.23
19.8889	35.85
19.9028	35.17
19.9167	35.6
19.9306	36.41
19.9445	36.72
19.9583	37.04
19.9722	36.6
19.9861	36.54
20	35.85
20.0139	36.29
20.0278	36.29
20.0417	37.97
20.0556	37.16
20.0695	36.29
20.0833	35.91
20.0972	37.47
20.1111	37.22
20.125	36.6
20.1389	36.6
20.1528	35.85
20.1667	35.67
20.1806	34.98
20.1945	35.04
20.2083	35.04
20.2222	35.29
20.2361	34.79
20.25	35.67
20.2639	35.6
20.2778	36.16
20.2917	35.73
20.3056	35.04
20.3195	34.42
20.3333	35.35
20.3472	35.1
20.3611	35.35
20.375	35.35
20.3889	34.85
20.4028	34.85
20.4167	34.73
20.4306	35.04
20.4445	35.17
20.4583	35.54
20.4722	35.17
20.4861	34.92
20.5	35.54
20.5139	35.1
20.5278	35.1
20.5417	35.04
20.5556	35.6
20.5695	35.67
20.5833	35.48
20.5972	35.54
20.6111	35.42
20.625	35.29
20.6389	35.35
20.6528	34.67
20.6667	36.04
20.6806	36.1
20.6945	35.67
20.7083	35.67
20.7222	36.79
20.7361	36.66
20.75	35.98
20.7639	35.6
20.7778	35.73
20.7917	36.23
20.8056	35.85
20.8195	35.85
20.8333	35.48
20.8472	36.6
20.8611	36.66
20.875	37.28
20.8889	37.22
20.9028	37.41
20.9167	37.47
20.9306	37.04
20.9445	36.66
20.9583	36.1
20.9722	36.04
20.9861	35.73
21	36.54
21.0139	36.41
21.0278	37.41
21.0417	36.97
21.0556	36.66
21.0695	37.6
21.0833	37.22
21.0972	37.28
21.1111	36.66
21.125	36.29
21.1389	35.98
21.1528	36.66
21.1667	37.28
21.1806	37.41
21.1945	36.41
21.2083	35.79
21.2222	35.35
21.2361	35.35
21.25	35.17
21.2639	34.73
21.2778	35.6
21.2917	36.54
21.3056	36.04
21.3195	35.23
21.3333	34.79
21.3472	35.48
21.3611	36.16
21.375	35.85
21.3889	35.29
21.4028	34.92
21.4167	35.1
21.4306	34.73
21.4445	35.04
21.4583	34.79
21.4722	34.98
21.4861	34.92
21.5	35.79
21.5139	35.42
21.5278	35.23
21.5417	34.73
21.5556	35.04
21.5695	35.91
21.5833	35.48
21.5972	35.23
21.6111	35.04
21.625	34.92
21.6389	35.54
21.6528	35.29
21.6667	35.04
21.6806	35.79
21.6945	36.1
21.7083	35.6
21.7222	35.35
21.7361	34.98
21.75	36.72
21.7639	36.54
21.7778	36.79
21.7917	37.35
21.8056	37.04
21.8195	36.66
21.8333	35.98
21.8472	36.04
21.8611	35.85
21.875	35.6
21.8889	35.54
21.9028	36.35
21.9167	37.91
21.9306	37.04
21.9445	37.16
21.9583	37.41
21.9722	37.6
21.9861	37.53
22	37.41
22.0139	36.6
22.0278	35.85
22.0417	35.91
22.0556	36.41
22.0695	36.16
22.0833	35.73
22.0972	37.16
22.1111	37.28
22.125	36.85
22.1389	37.04
22.1528	36.16
22.1667	35.98
22.1806	35.35
22.1945	35.35
22.2083	34.92
22.2222	35.6
22.2361	36.54
22.25	35.73
22.2639	35.29
22.2778	35.29
22.2917	35.79
22.3056	35.98
22.3195	35.23
22.3333	34.79
22.3472	34.85
22.3611	36.04
22.375	35.54
22.3889	35.35
22.4028	35.42
22.4167	35.73
22.4306	35.1
22.4445	35.1
22.4583	36.23
22.4722	35.67
22.4861	35.48
22.5	35.73
22.5139	35.48
22.5278	35.42
22.5417	35.48
22.5556	36.04
22.5695	35.79
22.5833	35.48
22.5972	35.67
22.6111	35.23
22.625	35.1
22.6389	35.48
22.6528	36.1
22.6667	35.73
22.6806	35.54
22.6945	35.79
22.7083	36.04
22.7222	36.54
22.7361	35.98
22.75	35.6
22.7639	35.42
22.7778	35.73
22.7917	35.6
22.8056	36.23
22.8195	36.79
22.8333	37.47
22.8472	36.72
22.8611	36.66
22.875	35.79
22.8889	35.35
22.9028	36.04
22.9167	36.54
22.9306	35.91
22.9445	36.72
22.9583	37.1
22.9722	37.72
22.9861	37.41
23	36.91
23.0139	36.29
23.0278	35.73
23.0417	35.29
23.0556	35.73
23.0695	35.6
23.0833	36.16
23.0972	36.97
23.1111	37.28
23.125	36.91
23.1389	36.54
23.1528	35.73
23.1667	35.29
23.1806	34.79
23.1945	35.35
23.2083	35.73
23.2222	36.29
23.2361	35.42
23.25	35.23
23.2639	35.35
23.2778	35.04
23.2917	35.42
23.3056	35.1
23.3195	34.98
23.3333	35.29
23.3472	35.35
23.3611	35.17
23.375	34.85
23.3889	35.1
23.4028	35.54
23.4167	35.17
23.4306	35.04
23.4445	34.85
23.4583	36.41
23.4722	36.16
23.4861	35.54
23.5	35.29
23.5139	35.23
23.5278	35.29
23.5417	35.54
23.5556	35.54
23.5695	35.35
23.5833	35.23
23.5972	35.54
23.6111	35.35
23.625	36.29
23.6389	37.22
23.6528	36.48
23.6667	35.85
23.6806	35.23
23.6945	35.04
23.7083	35.04
23.7222	34.85
23.7361	35.85
23.75	35.67
23.7639	35.54
23.7778	35.6
23.7917	35.04
23.8056	35.1
23.8195	35.35
23.8333	35.48
23.8472	36.29
23.8611	37.22
23.875	38.16
23.8889	37.53
23.9028	37.22
23.9167	36.48
23.9306	35.98
23.9445	35.79
23.9583	35.85
23.9722	35.98
23.9861	36.66
24	36.41
24.0139	35.73
24.0278	36.66
24.0417	37.04
24.0556	36.41
24.0695	36.79
24.0833	37.22
24.0972	36.35
24.1111	36.35
24.125	35.85
24.1389	35.42
24.1528	35.23
24.1667	35.29
24.1806	35.98
24.1945	36.23
24.2083	37.1
24.2222	36.91
24.2361	36.1
24.25	35.35
24.2639	35.1
24.2778	34.85
24.2917	35.29
24.3056	34.85
24.3195	34.42
24.3333	35.35
24.3472	35.17
24.3611	34.98
24.375	34.54
24.3889	34.23
24.4028	34.67
24.4167	34.42
24.4306	34.23
24.4445	35.23
24.4583	35.04
24.4722	34.85
24.4861	34.92
24.5	34.79
24.5139	34.92
24.5278	34.85
24.5417	34.92
24.5556	35.54
24.5695	36.6
24.5833	35.73
24.5972	35.42
24.6111	34.85
24.625	35.04
24.6389	34.92
24.6528	34.42
24.6667	34.54
24.6806	35.17
24.6945	35.17
24.7083	35.04
24.7222	35.79
24.7361	35.73
24.75	36.29
24.7639	35.85
24.7778	35.98
24.7917	35.1
24.8056	34.79
24.8195	35.98
24.8333	35.91
24.8472	35.67
24.8611	35.48
24.875	35.91
24.8889	36.97
24.9028	37.6
24.9167	37.22
24.9306	36.29
24.9445	36.35
24.9583	36.97
24.9722	36.91
24.9861	36.16
25	35.85
25.0139	35.91
25.0278	35.79
25.0417	35.98
25.0556	35.91
25.0695	36.85
25.0833	37.72
25.0972	37.66
25.1111	37.28
25.125	36.72
25.1389	36.54
25.1528	35.91
25.1667	35.35
25.1806	35.67
25.1945	36.6
25.2083	36.35
25.2222	35.42
25.2361	34.79
25.25	34.61
25.2639	34.98
25.2778	35.54
25.2917	35.1
25.3056	34.79
25.3195	34.42
25.3333	34.42
25.3472	35.98
25.3611	35.85
25.375	35.23
25.3889	35.04
25.4028	34.67
25.4167	34.92
25.4306	34.36
25.4445	34.04
25.4583	35.1
25.4722	35.04
25.4861	34.67
25.5	34.48
25.5139	34.79
25.5278	34.42
25.5417	35.1
25.5556	35.85
25.5695	35.17
25.5833	35.23
25.5972	35.1
25.6111	35.42
25.625	34.98
25.6389	35.98
25.6528	35.73
25.6667	35.35
25.6806	35.79
25.6945	36.41
25.7083	36.04
25.7222	35.73
25.7361	35.35
25.75	35.29
25.7639	35.67
25.7778	35.6
25.7917	36.29
25.8056	36.85
25.8195	36.85
25.8333	35.85
25.8472	35.85
25.8611	36.16
25.875	35.98
25.8889	36.35
25.9028	37.16
25.9167	37.35
25.9306	37.6
25.9445	36.91
25.9583	37.28
25.9722	36.97
25.9861	36.48
26	36.35
26.0139	35.79
26.0278	35.23
26.0417	35.1
26.0556	35.54
26.0695	36.04
26.0833	35.85
26.0972	36.91
26.1111	37.85
26.125	37.35
26.1389	37.16
26.1528	37.47
26.1667	36.91
26.1806	36.23
26.1945	35.6
26.2083	35.04
26.2222	34.92
26.2361	35.35
26.25	35.85
26.2639	35.48
26.2778	35.17
26.2917	35.23
26.3056	34.79
26.3195	35.98
26.3333	35.6
26.3472	35.1
26.3611	34.73
26.375	35.29
26.3889	34.92
26.4028	34.92
26.4167	35.29
26.4306	35.17
26.4445	34.92
26.4583	35.35
26.4722	35.91
26.4861	35.48
26.5	35.42
26.5139	35.48
26.5278	35.04
26.5417	34.98
26.5556	34.85
26.5695	35.42
26.5833	34.85
26.5972	35.98
26.6111	36.54
26.625	36.48
26.6389	35.98
26.6528	35.48
26.6667	34.98
26.6806	35.17
26.6945	36.35
26.7083	37.1
26.7222	36.48
26.7361	36.35
26.75	36.97
26.7639	38.16
26.7778	37.28
26.7917	36.29
26.8056	36.48
26.8195	36.04
26.8333	35.73
26.8472	36.16
26.8611	35.98
26.875	35.85
26.8889	35.73
26.9028	35.6
26.9167	36.66
26.9306	36.35
26.9445	36.91
26.9583	37.85
26.9722	37.47
26.9861	36.54
27	35.85
27.0139	35.29
27.0278	35.67
27.0417	36.79
27.0556	36.79
27.0695	37.53
27.0833	37.47
27.0972	37.35
27.1111	36.97
27.125	36.35
27.1389	35.98
27.1528	35.91
27.1667	35.85
27.1806	36.16
27.1945	36.35
27.2083	36.97
27.2222	37.28
27.2361	36.6
27.25	36.97
27.2639	36.85
27.2778	36.29
27.2917	35.6
27.3056	35.1
27.3195	34.85
27.3333	34.98
27.3472	34.85
27.3611	35.48
27.375	35.35
27.3889	35.1
27.4028	34.48
27.4167	34.04
27.4306	34.29
27.4445	35.04
27.4583	35.29
27.4722	35.23
27.4861	34.98
27.5	35.29
27.5139	34.98
27.5278	35.73
27.5417	35.29
27.5556	35.54
27.5695	35.29
27.5833	35.42
27.5972	35.23
27.6111	36.16
27.625	35.91
27.6389	35.54
27.6528	35.35
27.6667	35.48
27.6806	35.79
27.6945	35.23
27.7083	36.23
27.7222	36.1
27.7361	36.1
27.75	36.04
27.7639	37.16
27.7778	36.48
27.7917	36.16
27.8056	35.91
27.8195	36.04
27.8333	36.85
27.8472	37.04
27.8611	37.72
27.875	37.85
27.8889	37.04
27.9028	36.72
27.9167	35.91
27.9306	36.6
27.9445	36.1
27.9583	36.54
27.9722	36.66
27.9861	37.22
28	37.28
28.0139	36.97
28.0278	36.48
28.0417	36.6
28.0556	37.53
28.0695	37.72
28.0833	36.91
28.0972	36.54
28.1111	35.85
28.125	36.16
28.1389	35.73
28.1528	35.6
28.1667	36.04
28.1806	35.79
28.1945	35.35
28.2083	35.42
28.2222	35.98
28.2361	37.28
28.25	36.41
28.2639	36.29
28.2778	36.23
28.2917	35.67
28.3056	35.04
28.3195	35.04
28.3333	35.04
28.3472	35.17
28.3611	34.92
28.375	34.54
28.3889	35.42
28.4028	36.16
28.4167	35.29
28.4306	35.17
28.4445	35.1
28.4583	34.79
28.4722	34.98
28.4861	34.54
28.5	34.36
28.5139	35.85
28.5278	36.23
28.5417	35.6
28.5556	35.1
28.5695	34.85
28.5833	34.85
28.5972	35.04
28.6111	34.48
28.625	35.54
28.6389	35.04
28.6528	34.92
28.6667	34.85
28.6806	35.42
28.6945	35.17
28.7083	35.42
28.7222	35.6
[truncated: 5,755 more rows]

[truncated: 21 more sheets: 8C_AN10, 8C_AN11, 8C_AN12, 8C_AN14, 8C_AN15, 15C_AN16, 15C_AN18, 15C_AN19, 15C_AN20, 15C_AN21, 15C_AN24, 15C_AN29, 15C_AN30, 22C_AN32, 22C_AN33, 22C_AN34, 22C_AN35, 22C_AN36, 22C_AN37, 22C_AN38 …]
